# Supplementary material
Source: HighWire-hosted journal article supplement (https://bmjopen.bmj.com/content/13/3/e064870)
Supplement: inline-supplementary-material-3 [file inline-supplementary-material-3.pdf]

## SUPPLEMENTARY RESULTS

**Article title:** Sequential Organ Failure Assessment (SOFA) score for predicting mortality in patients with sepsis in Vietnamese intensive care units: A multicentre, cross-sectional study

### TABLE OF CONTENT

**Table S1.** Hospital and intensive care unit characteristics according to hospital survivability of patients with sepsis

**Table S2.** Baseline characteristics according to hospital survivability of patients with sepsis

**Table S3.** Clinical and laboratory characteristics and severity of illness according to hospital survivability of patients with sepsis

**Table S4.** Sites of infection and microbiology according to hospital survivability of patients with sepsis

**Table S5.** Completion of sepsis bundle elements according to the hospital survivability of patients with sepsis

**Table S6.** Completion of the sepsis bundle of care and the initial administration of antibiotics according to the hospital survivability of patients with sepsis

**Table S7.** Life-sustaining treatments during ICU stay and outcomes according to hospital survivability of patients with sepsis

**Table S8.** Hospital and intensive care unit characteristics according to intensive care unit survivability of patients with sepsis

**Table S9.** Baseline characteristics according to intensive care unit survivability of patients with sepsis

**Table S10.** Clinical and laboratory characteristics and severity of illness according to intensive care unit survivability of patients with sepsis

**Table S11.** Sites of infection and microbiology according to intensive care unit survivability of patients with sepsis

**Table S12.** Completion of sepsis bundle elements according to intensive care unit survivability of patients with sepsis

**Table S13.** Completion of the sepsis bundle of care and the initial administration of antibiotics according to intensive care unit survivability of patients with sepsis

**Table S14.** Life-sustaining treatments during ICU stay and outcomes according to intensive care unit survivability of patients with sepsis

**Table S15.** Factors associated with hospital mortality in patients with sepsis: univariable regression analyses

**Table S16.** Factors associated with hospital mortality in patients with sepsis: multivariable logistic regression analyses (backward elimination)

**Table S17.** Factors associated with intensive care unit mortality in patients with sepsis: univariable regression analyses

**Table S18.** Factors associated with intensive care unit mortality in patients with sepsis: multivariable logistic regression analyses (backward elimination)

**Table S19.** Breakdown of missing data

## **TABLES**

**Table S1.** Hospital and intensive care unit characteristics according to hospital survivability of patients with sepsis

| Variable                        | All cases<br>n=252 | Survived<br>n=151 | Died<br>n=101 | p <sup>a</sup> |
|---------------------------------|--------------------|-------------------|---------------|----------------|
| Participating hospital, no. (%) |                    |                   |               | NA             |
| 115 People's                    | 25 (9.9)           | 6 (4.0)           | 19 (18.8)     |                |
| Bach Mai                        | 26 (10.3)          | 14 (9.3)          | 12 (11.9)     |                |
| Bai Chay                        | 14 (5.6)           | 10 (6.6)          | 4 (4.0)       |                |
| Can Tho                         | 7 (2.8)            | 1 (0.7)           | 6 (5.9)       |                |
| Cho Ray                         | 41 (16.3)          | 19 (12.6)         | 22 (21.8)     |                |
| Da Nang                         | 12 (4.8)           | 6 (4.0)           | 6 (5.9)       |                |
| Dong Da                         | 9 (3.6)            | 6 (4.0)           | 3 (3.0)       |                |
| Hanoi Medical University        | 12 (4.8)           | 6 (4.0)           | 6 (5.9)       |                |
| Hue                             | 39 (15.5)          | 26 (17.2)         | 13 (12.9)     |                |

|                                       |            |            |           |        |
|---------------------------------------|------------|------------|-----------|--------|
| Saint Paul                            | 9 (3.6)    | 9 (6.0)    | 0 (0.0)   |        |
| Thai Nguyen                           | 2 (0.8)    | 1 (0.7)    | 1 (1.0)   |        |
| Thanh Nhan                            | 1 (0.4)    | 0 (0.0)    | 1 (1.0)   |        |
| Vietnam–Czechoslovakia Friendship     | 48 (19.0)  | 40 (26.5)  | 8 (7.9)   |        |
| Vinmec Times City International       | 7 (2.8)    | 7 (4.6)    | 0 (0.0)   |        |
| <b>Hospital characteristics</b>       |            |            |           |        |
| Type of hospital, no. (%)             |            |            |           | NA     |
| Rural                                 | 0 (0.0)    | 0 (0.0)    | 0 (0.0)   |        |
| Urban                                 | 252 (100)  | 151 (100)  | 101 (100) |        |
| University affiliation, no. (%)       |            |            |           | <0.001 |
| No                                    | 153 (60.7) | 105 (69.5) | 48 (47.5) |        |
| Yes                                   | 99 (39.3)  | 46 (30.5)  | 53 (52.5) |        |
| <b>ICU characteristics</b>            |            |            |           |        |
| Nature of ICU, no. (%)                |            |            |           | NA     |
| Open                                  | 0 (0.0)    | 0 (0.0)    | 0 (0.0)   |        |
| Closed                                | 252 (100)  | 151 (100)  | 101 (100) |        |
| Type of ICU, no. (%)                  |            |            |           | 0.589  |
| Medical                               | 110 (43.7) | 68 (45.0)  | 42 (41.6) |        |
| Surgical                              | 0 (0.0)    | 0 (0.0)    | 0 (0.0)   |        |
| Mixed                                 | 142 (56.3) | 83 (55.0)  | 59 (58.4) |        |
| Nurse to patient ratio, no. (%)       |            |            |           | 0.079  |
| 1 or more nurses : 1 patient          | 7 (2.8)    | 7 (4.6)    | 0 (0.0)   |        |
| 1 nurse : 2 patients                  | 187 (74.2) | 111 (73.5) | 76 (75.2) |        |
| 1 nurse : 3 patients                  | 0 (0.0)    | 0 (0.0)    | 0 (0.0)   |        |
| 1 nurse : 4 or more patients          | 58 (23.0)  | 33 (21.9)  | 25 (24.8) |        |
| Intensivist to patient ratio, no. (%) |            |            |           | 0.446  |
| 1 intensivist : 5 or fewer patients   | 165 (65.5) | 96 (63.6)  | 69 (68.3) |        |
| 1 intensivist : 6 to 8 patients       | 75 (29.8)  | 49 (32.5)  | 26 (25.7) |        |
| 1 intensivist : 9 to 11 patients      | 0 (0.0)    | 0 (0.0)    | 0 (0.0)   |        |
| 1 intensivist : 12 or more patients   | 12 (4.8)   | 6 (4.0)    | 6 (5.9)   |        |
| Training programme in ICU, no. (%)    |            |            |           | 0.010  |
| No                                    | 50 (19.8)  | 22 (14.6)  | 28 (27.7) |        |
| Yes                                   | 202 (80.2) | 129 (85.4) | 73 (72.3) |        |

<sup>a</sup>Comparison between the patients who survived and died using the Chi-squared test; \*Fisher's exact test; \*\*Mann–Whitney U test.

Abbreviations: ICU, intensive care unit; NA, not available; no., number.

**Table S2.** Baseline characteristics according to hospital survivability of patients with sepsis

| Variable                 | All cases<br>n=252 | Survived<br>n=151 | Died<br>n=101 | p <sup>a</sup> |
|--------------------------|--------------------|-------------------|---------------|----------------|
| Age (year), median (IQR) | 65 (52-            | 65 (53-76)        | 65 (52-78)    | 0.810**        |

|                              |            |            |           |         |
|------------------------------|------------|------------|-----------|---------|
|                              | 76.75)     |            |           |         |
| Age (year), no. (%)          |            |            |           | 0.865*  |
| < 20                         | 3 (1.2)    | 2 (1.3)    | 1 (1.0)   |         |
| 20 - 39                      | 19 (7.5)   | 10 (6.6)   | 9 (8.9)   |         |
| 40 - 59                      | 74 (29.4)  | 43 (28.5)  | 31 (30.7) |         |
| ≥ 60                         | 156 (61.9) | 96 (63.6)  | 60 (59.4) |         |
| Sex (male), no. (%)          | 162 (64.3) | 93 (61.6)  | 69 (68.3) | 0.275   |
| Collection batch, no. (%)    |            |            |           | 0.007   |
| Collection 1 (Jan)           | 80 (31.7)  | 58 (38.4)  | 22 (21.8) |         |
| Collection 2 (April)         | 62 (24.6)  | 27 (17.9)  | 35 (34.7) |         |
| Collection 3 (July)          | 54 (21.4)  | 32 (21.2)  | 22 (21.8) |         |
| Collection 4 (Oct)           | 56 (22.2)  | 34 (22.5)  | 22 (21.8) |         |
| Admission type, no. (%)      |            |            |           | 0.195*  |
| Medical                      | 236 (93.7) | 138 (91.4) | 98 (97.0) |         |
| Elective surgical            | 2 (0.8)    | 2 (1.3)    | 0 (0.0)   |         |
| Unscheduled surgical         | 14 (5.6)   | 11 (7.3)   | 3 (3.0)   |         |
| Admission source, no. (%)    |            |            |           | 0.505*  |
| Emergency department         | 138 (54.8) | 87 (57.6)  | 51 (50.5) |         |
| Operating room               | 4 (1.6)    | 3 (2.0)    | 1 (1.0)   |         |
| General wards                | 56 (22.2)  | 33 (21.9)  | 23 (22.8) |         |
| Other ICUs or HDU            | 16 (6.3)   | 10 (6.6)   | 6 (5.9)   |         |
| Inter-hospital transfer      | 37 (14.7)  | 18 (11.9)  | 19 (18.8) |         |
| Others                       | 1 (0.4)    | 0 (0.0)    | 1 (1.0)   |         |
| Comorbidities, no. (%)       |            |            |           |         |
| Cardiovascular disease       | 78 (31.0)  | 41 (27.2)  | 37 (36.6) | 0.111   |
| Chronic lung disease         | 30 (11.9)  | 18 (11.9)  | 12 (1.9)  | 0.992   |
| Chronic neurological disease | 36 (14.3)  | 28 (18.5)  | 8 (7.9)   | 0.018   |
| Chronic kidney disease       | 23 (9.1)   | 14 (9.3)   | 9 (8.9)   | 0.922   |
| Peptic ulcer disease         | 9 (3.6)    | 5 (3.3)    | 4 (4.0)   | >0.999* |
| Chronic liver disease        | 27 (10.7)  | 14 (9.3)   | 13 (12.9) | 0.365   |
| Diabetes mellitus            | 67 (26.6)  | 40 (26.5)  | 27 (26.7) | 0.966   |
| HIV infection                | 0 (0.0)    | 0 (0.0)    | 0 (0.0)   | NA      |
| Connective tissue disease    | 3 (1.2)    | 2 (1.3)    | 1 (1.0)   | >0.999* |
| Immunosuppression            | 10 (4.0)   | 7 (4.6)    | 3 (3.0)   | 0.744*  |
| Haematological malignancies  | 5 (2.0)    | 3 (2.0)    | 2 (2.0)   | >0.999* |
| Solid malignant tumours      | 12 (4.8)   | 6 (4.0)    | 6 (5.9)   | 0.551*  |

<sup>a</sup>Comparison between the patients who survived and died using the Chi-squared test; \*Fisher's exact test; \*\*Mann-Whitney U test.

**Abbreviations:** **HIV**, human immunodeficiency virus; **ICU**, intensive care unit; **IQR**, interquartile range; **NA**, not available; **no.**, number.

**Table S3.** Clinical and laboratory characteristics and severity of illness according to hospital survivability of patients with sepsis

| Variable                                            | All cases          | Survived        | Died            | p <sup>a</sup>       |
|-----------------------------------------------------|--------------------|-----------------|-----------------|----------------------|
| <b>Vital signs</b> (on admission into ICU)          |                    |                 |                 |                      |
| GCS, median (IQR)                                   | 13 (9-15)          | 14 (10-15)      | 10 (8-14)       | <0.001 <sup>**</sup> |
| HR (beats per min), median (IQR)                    | 110 (95.25-125.75) | 110 (92-125)    | 110 (100-129.5) | 0.083 <sup>**</sup>  |
| Temperature (°C), mean (SD)                         | 37.79 (1.01)       | 37.80 (1.08)    | 37.77 (0.91)    | 0.871 <sup>**</sup>  |
| MBP (mmHg), mean(SD)                                | 75.82 (22.08)      | 79.75 (22.88)   | 69.93 (19.51)   | 0.002 <sup>**</sup>  |
| SBP (mmHg), mean (SD)                               | 106.45 (29.96)     | 111.39 (29.44)  | 99.07 (29.35)   | 0.004 <sup>**</sup>  |
| RR (breaths per min), median (IQR)                  | 25 (22-30)         | 25 (22-30)      | 25 (20-30)      | 0.693 <sup>**</sup>  |
| <b>Blood investigations</b>                         |                    |                 |                 |                      |
| Total WBC (x10 <sup>9</sup> /L), mean (SD)          | 15.73 (9.20)       | 15.63 (8.67)    | 15.88 (9.98)    | 0.914 <sup>**</sup>  |
| PLT (x10 <sup>9</sup> /L), mean (SD)                | 185.98 (137.85)    | 200.71 (129.67) | 163.95 (147.15) | 0.002 <sup>**</sup>  |
| Hb (g/dL), mean (SD)                                | 11.14 (2.59)       | 11.36 (2.68)    | 10.82 (2.44)    | 0.088 <sup>**</sup>  |
| Hct (%), mean (SD)                                  | 34.31 (7.75)       | 35.08 (7.92)    | 33.17 (7.38)    | 0.031 <sup>**</sup>  |
| K <sup>+</sup> (mmol/L), mean (SD)                  | 3.89 (0.79)        | 3.90 (0.80)     | 3.87 (0.77)     | 0.865 <sup>**</sup>  |
| Na <sup>+</sup> (mmol/L), mean (SD)                 | 136.05 (8.24)      | 135.62 (8.81)   | 136.69 (7.80)   | 0.068 <sup>**</sup>  |
| Creatinine (μmol/L), mean (SD)                      | 187.85 (151.92)    | 186.15 (171.60) | 190.38 (117.27) | 0.030 <sup>**</sup>  |
| Bilirubin (μmol/l), mean (SD)                       | 32.80 (61.49)      | 31.74 (72.67)   | 34.35 (40.09)   | 0.007 <sup>**</sup>  |
| pH, mean (SD)                                       | 7.37 (0.50)        | 7.41 (0.64)     | 7.32 (0.14)     | 0.004 <sup>**</sup>  |
| PaO <sub>2</sub> (mmHg), mean (SD)                  | 116.17 (74.28)     | 110.23 (56.25)  | 124.73 (94.07)  | 0.665 <sup>**</sup>  |
| FiO <sub>2</sub> , mean (SD)                        | 0.50 (0.22)        | 0.44 (0.18)     | 0.58 (0.24)     | <0.001 <sup>**</sup> |
| PaO <sub>2</sub> /FiO <sub>2</sub> ratio, mean (SD) | 262.48 (149.58)    | 281.52 (149.39) | 235.26 (146.32) | 0.003 <sup>**</sup>  |
| <b>Severity of illness scores</b>                   |                    |                 |                 |                      |
| qSOFA, median (IQR)                                 | 2 (1-2)            | 2 (1-2)         | 2 (2-3)         | 0.001 <sup>**</sup>  |
| qSOFA, no. (%)                                      |                    |                 |                 | 0.055                |
| 0 - 1                                               | 69 (27.4)          | 48 (31.8)       | 21 (20.8)       |                      |
| 2 - 3                                               | 183 (72.6)         | 103 (68.2)      | 80 (79.2)       |                      |
| SIRS, median (IQR)                                  | 3 (2-4)            | 3 (2-4)         | 3 (2-4)         | 0.937 <sup>**</sup>  |
| SOFA, median (IQR)                                  | 7 (4.75-10)        | 6 (4-9)         | 9 (6-12)        | <0.001 <sup>**</sup> |
| SOFA, no. (%)                                       |                    |                 |                 | <0.001               |
| 0 - 1                                               | 0 (0.0)            | 0 (0.0)         | 0 (0.0)         |                      |

|                         |            |            |            |                      |
|-------------------------|------------|------------|------------|----------------------|
| 2 - 3                   | 46 (18.4)  | 33 (22.1)  | 13 (12.9)  |                      |
| 4 - 5                   | 36 (14.4)  | 28 (18.8)  | 8 (7.9)    |                      |
| 6 - 7                   | 58 (23.2)  | 43 (28.9)  | 15 (14.9)  |                      |
| 8 - 9                   | 32 (12.8)  | 16 (10.7)  | 16 (15.8)  |                      |
| 10 - 11                 | 38 (15.2)  | 20 (13.4)  | 18 (17.8)  |                      |
| 12 - 14                 | 29 (11.6)  | 8 (5.4)    | 21 (20.8)  |                      |
| > 14                    | 11 (4.4)   | 1 (0.7)    | 10 (9.9)   |                      |
| SOFA, no. (%)           |            |            |            | <0.001               |
| < 8                     | 140 (56.0) | 113 (68.1) | 27 (32.1)  |                      |
| ≥ 8 <sup>b</sup>        | 110 (44.0) | 53 (31.9)  | 57 (67.9)  |                      |
| APACHE II, median (IQR) | 18 (13-24) | 15 (12-21) | 22 (16-27) | <0.001 <sup>**</sup> |
| APACHE II, no. (%)      |            |            |            | <0.001               |
| 0 - 4                   | 3 (1.2)    | 3 (2.0)    | 0 (0.0)    |                      |
| 5 - 9                   | 22 (8.7)   | 16 (10.6)  | 6 (5.9)    |                      |
| 10 - 14                 | 61 (24.2)  | 50 (33.1)  | 11 (10.9)  |                      |
| 15 - 19                 | 52 (20.6)  | 33 (21.9)  | 19 (18.8)  |                      |
| 20 - 24                 | 58 (23.0)  | 27 (17.9)  | 31 (30.7)  |                      |
| 25 - 29                 | 28 (11.1)  | 9 (6.0)    | 19 (18.8)  |                      |
| 30 - 34                 | 19 (7.5)   | 10 (6.6)   | 9 (8.9)    |                      |
| > 34                    | 9 (3.6)    | 3 (2.0)    | 6 (5.9)    |                      |
| APACHE II, no. (%)      |            |            |            | <0.001               |
| < 21                    | 148 (58.7) | 115 (68.5) | 33 (39.3)  |                      |
| ≥ 21 <sup>b</sup>       | 104 (41.3) | 53 (31.5)  | 51 (60.7)  |                      |
| Septic Shock            | 74 (29.4)  | 35 (23.2)  | 39 (38.6)  | 0.008                |

<sup>a</sup>Comparison between the patients who survived and died using the Chi-squared test; <sup>\*</sup>Fisher's exact test;

<sup>\*\*</sup>Mann-Whitney U test.

<sup>b</sup> The cut-off value of the SOFA or APACHE II score, which was determined by receiver operator characteristic curve analysis, for predicting death in the hospital.

**Abbreviations:** **APACHE II:** Acute Physiology and Chronic Health Evaluation II Score; **FiO<sub>2</sub>:** fraction of inspired oxygen; **GCS:** Glasgow Coma Scale; **Hb:** haemoglobin; **HR:** heart rate; **ICU:** intensive care unit; **IQR:** interquartile range; **MBP:** mean blood pressure; **no.:** number; **PaO<sub>2</sub>:** partial pressure of oxygen in the arterial blood; **PLT:** platelet count; **RR:** respiratory rate; **SD:** standard deviation; **SOFA:** Sequential Organ Failure Assessment Score; **WBC:** white blood cell.

**Table S4.** Sites of infection and microbiology according to hospital survivability of patients with sepsis

| Variable                 | All cases<br>n=252 | Survived<br>n=151 | Died<br>n=101 | p <sup>a</sup>     |
|--------------------------|--------------------|-------------------|---------------|--------------------|
| <b>Site of Infection</b> |                    |                   |               |                    |
| Respiratory, no. (%)     | 143 (56.7)         | 82 (54.3)         | 61 (60.4)     | 0.339              |
| Urinary tract, no. (%)   | 37 (14.7)          | 30 (19.9)         | 7 (6.9)       | 0.004              |
| Abdominal, no. (%)       | 61 (24.2)          | 34 (22.5)         | 27 (26.7)     | 0.444              |
| Neurological, no. (%)    | 12 (4.8)           | 8 (5.3)           | 4 (4.0)       | 0.767 <sup>*</sup> |

|                                     |            |           |           |         |
|-------------------------------------|------------|-----------|-----------|---------|
| Bones or joints, no. (%)            | 2 (0.8)    | 2 (1.3)   | 0 (0.0)   | 0.518*  |
| Skin or cutaneous sites, no. (%)    | 19 (7.5)   | 7 (4.6)   | 12 (11.9) | 0.033   |
| Intravascular catheter, no. (%)     | 1 (0.4)    | 1 (0.7)   | 0 (0.0)   | >0.999* |
| Infective endocarditis, no. (%)     | 1 (0.4)    | 0 (0.0)   | 1 (1.0)   | 0.401*  |
| Primary bacteraemia, no. (%)        | 7 (2.8)    | 5 (3.3)   | 2 (2.0)   | 0.705*  |
| Systemic, no. (%)                   | 6 (2.4)    | 4 (2.6)   | 2 (2.0)   | >0.999* |
| <b>Microbiology</b>                 |            |           |           |         |
| No pathogens detected, no. (%)      | 67 (26.6)  | 47 (31.1) | 20 (19.8) | 0.046   |
| Gram negative bacteria, no. (%)     | 156 (61.9) | 88 (58.3) | 68 (67.3) | 0.147   |
| <i>Klebsiella pneumonia</i>         | 27 (10.7)  | 16 (10.6) | 11 (10.9) | 0.941   |
| <i>Acinetobacter baumannii</i>      | 45 (17.9)  | 21 (13.9) | 24 (23.8) | 0.045   |
| <i>Escherichia coli</i>             | 44 (17.5)  | 26 (17.2) | 18 (17.8) | 0.902   |
| <i>Pseudomonas aeruginosa</i>       | 24 (9.5)   | 17 (11.3) | 7 (6.9)   | 0.251   |
| <i>Stenotrophomonas maltophilia</i> | 2 (0.8)    | 0 (0.0)   | 2 (2.0)   | 0.160*  |
| <i>Proteus species</i>              | 47 (18.7)  | 25 (16.6) | 22 (21.8) | 0.297   |
| <i>Enterobacter cloacae</i>         | 3 (1.2)    | 3 (2.0)   | 0 (0.0)   | 0.277*  |
| <i>Bulkholderia pseudomallei</i>    | 1 (0.4)    | 0 (0.0)   | 1 (1.0)   | 0.221*  |
| <i>Others</i>                       | 0 (0.0)    | 0 (0.0)   | 0 (0.0)   | NA      |
| Gram positive bacteria, no. (%)     | 34 (13.5)  | 22 (14.6) | 12 (11.9) | 0.540   |
| <i>Enterococcus</i>                 | 5 (2.0)    | 5 (3.3)   | 0 (0.0)   | 0.085*  |
| <i>MSSA</i>                         | 5 (2.0)    | 3 (2.0)   | 2 (2.0)   | >0.999* |
| <i>MRSA</i>                         | 10 (4.0)   | 6 (4.0)   | 4 (4.0)   | >0.999* |
| <i>Other Streptococcus species</i>  | 12 (4.8)   | 6 (4.0)   | 6 (5.9)   | 0.551*  |
| <i>Streptococcus pneumonia</i>      | 2 (0.8)    | 2 (1.3)   | 0 (0.0)   | 0.518*  |
| Fungi, no. (%)                      | 7 (2.8)    | 4 (2.6)   | 3 (3.0)   | >0.999  |
| <i>Candida species</i>              | 7 (2.8)    | 4 (2.6)   | 3 (3.0)   | >0.999* |
| <i>Aspergillus species</i>          | 0 (0.0)    | 0 (0.0)   | 0 (0.0)   | NA      |
| <i>Others</i>                       | 0 (0.0)    | 0 (0.0)   | 0 (0.0)   | NA      |
| Viruses, no. (%)                    | 2 (0.8)    | 0 (0.0)   | 2 (2.0)   | 0.160*  |
| <i>Influenza</i>                    | 1 (0.4)    | 0 (0.0)   | 1 (1.0)   | 0.401*  |
| <i>Dengue</i>                       | 1 (0.4)    | 0 (0.0)   | 1 (1.0)   | 0.401*  |
| <i>Others</i>                       | 0 (0.0)    | 0 (0.0)   | 0 (0.0)   | NA      |
| Other pathogens, no. (%)            |            |           |           |         |
| <i>Anaerobes</i>                    | 0 (0.0)    | 0 (0.0)   | 0 (0.0)   | NA      |
| <i>Mycobacterium tuberculosis</i>   | 4 (1.6)    | 3 (2.0)   | 1 (1.0)   | 0.651*  |
| <i>Malaria</i>                      | 0 (0.0)    | 0 (0.0)   | 0 (0.0)   | NA      |

\*Comparison between the patients who survived and died using the Chi-squared test; \*Fisher's exact test; \*\*Mann-Whitney U test.

**Abbreviations:** **MRSA:** methicillin-resistant *Staphylococcus aureus*; **MSSA:** methicillin-susceptible *Staphylococcus aureus*; **NA,** not available; **no.,** number.

**Table S5.** Completion of sepsis bundle elements according to the hospital survivability of patients with sepsis

| Variable                                                       | All cases<br>n=252 | Survived<br>n=151 | Died<br>n=101 | p <sup>a</sup>      |
|----------------------------------------------------------------|--------------------|-------------------|---------------|---------------------|
| <b>Timing of antibiotics administration</b>                    |                    |                   |               |                     |
| Performed within 24 hours, no. (%)                             | n=225              | n=141             | n=84          | 0.348               |
| 0-60 minutes                                                   | 173 (76.9)         | 109 (77.3)        | 64 (76.2)     |                     |
| 61-120 minutes                                                 | 21 (9.3)           | 13 (9.2)          | 8 (9.5)       |                     |
| 121-180 minutes                                                | 14 (6.2)           | 11 (7.8)          | 3 (3.6)       |                     |
| >180 minutes                                                   | 17 (7.6)           | 8 (5.7)           | 9 (10.7)      |                     |
| Not performed within 24 hours, no. (%)                         | 0 (0.0)            | 0 (0.0)           | 0 (0.0)       | NA                  |
| Timing of antibiotics administration, median (IQR), minutes    | 30 (11-60)         | 35 (13.5-60)      | 30 (10-60)    | 0.794 <sup>**</sup> |
| <b>Timing of obtaining blood cultures</b>                      |                    |                   |               |                     |
| Performed within 24 hours, no. (%)                             | n=197              | n=114             | n=83          | 0.838               |
| 0-60 minutes                                                   | 135 (68.5)         | 77 (67.5)         | 58 (69.9)     |                     |
| 61-120 minutes                                                 | 14 (7.1)           | 7 (6.1)           | 7 (8.4)       |                     |
| 121-180 minutes                                                | 10 (5.1)           | 6 (5.3)           | 4 (4.8)       |                     |
| >180 minutes                                                   | 38 (19.3)          | 24 (21.1)         | 14 (16.9)     |                     |
| Not performed within 24 hours, no. (%)                         | 0 (0.0)            | 0 (0.0)           | 0 (0.0)       | NA                  |
| Timing of obtaining blood cultures, median (IQR), minutes      | 30.0 (15-114.5)    | 30 (14-130.5)     | 30 (15-90)    | 0.493 <sup>**</sup> |
| <b>Timing of obtaining lactate measurement</b>                 |                    |                   |               |                     |
| Performed within 24 hours, no. (%)                             | n=198              | n=121             | n=77          | 0.790 <sup>*</sup>  |
| 0-60 minutes                                                   | 141 (71.2)         | 85 (70.2)         | 56 (72.7)     |                     |
| 61-120 minutes                                                 | 10 (5.1)           | 6 (5.0)           | 4 (5.2)       |                     |
| 121-180 minutes                                                | 6 (3.0)            | 5 (4.1)           | 1 (1.3)       |                     |
| >180 minutes                                                   | 41 (20.7)          | 25 (20.7)         | 16 (20.8)     |                     |
| Not performed within 24 hours, no. (%)                         | 0 (0.0)            | 0 (0.0)           | 0 (0.0)       | NA                  |
| Timing of obtaining lactate measurement, median (IQR), minutes | 30 (10-92)         | 30 (10-139.5)     | 30 (10-75.5)  | 0.583 <sup>**</sup> |

<sup>a</sup>Comparison between the patients who survived and died using the Chi-squared test; \*Fisher's exact test;<sup>\*\*</sup>Mann-Whitney U test.Abbreviations: **IQR:** interquartile range; **NA,** not available; **no.:** number.



**Table S6.** Completion of the sepsis bundle of care and the initial administration of antibiotics according to the hospital survivability of patients with sepsis

| Variable                                                                               | All cases<br>n=252 | Survived<br>n=151 | Died<br>n=101 | p <sup>a</sup> |
|----------------------------------------------------------------------------------------|--------------------|-------------------|---------------|----------------|
| Completion of the sepsis bundle within 1 hour, no. (%), n=241                          | 87 (36.1)          | 53 (36.3)         | 34 (35.8)     | 0.936          |
| Completion of the initial administration of antibiotics within 1 hour, no. (%), n=241  | 173 (71.8)         | 109 (74.7)        | 64 (63.4)     | 0.219          |
| Permutations of the completed elements within 1 hour, no. (%)                          | n=241              | n=146             | n=95          | 0.196          |
| No elements completed                                                                  | 20 (8.3)           | 12 (8.2)          | 8 (8.4)       |                |
| Antibiotics only                                                                       | 44 (18.3)          | 30 (20.5)         | 14 (14.7)     |                |
| Blood cultures only                                                                    | 13 (5.4)           | 9 (6.2)           | 4 (4.2)       |                |
| Lactate only                                                                           | 23 (9.5)           | 11 (7.5)          | 12 (12.6)     |                |
| Antibiotics + Lactate                                                                  | 17 (7.1)           | 14 (9.6)          | 3 (3.2)       |                |
| Antibiotics + Blood cultures                                                           | 25 (10.4)          | 12 (8.2)          | 13 (13.7)     |                |
| Blood cultures + Lactate                                                               | 12 (5.0)           | 5 (3.4)           | 7 (7.4)       |                |
| Antibiotics + Blood cultures + Lactate                                                 | 87 (36.1)          | 53 (36.3)         | 34 (35.8)     |                |
| Completion of the sepsis bundle within 3 hours, no. (%), n=241                         | 108 (44.8)         | 66 (45.2)         | 42 (44.2)     | 0.879          |
| Completion of the initial administration of antibiotics within 3 hours, no. (%), n=241 | 205 (85.1)         | 131 (89.7)        | 74 (77.9)     | 0.012          |
| Permutation of the completed elements of 3-hour sepsis bundle, no. (%)                 | n=241              | n=146             | n=95          | 0.028          |
| No elements completed                                                                  | 8 (3.3)            | 3 (2.1)           | 5 (5.3)       |                |
| Antibiotics only                                                                       | 37 (15.4)          | 28 (19.2)         | 9 (9.5)       |                |
| Blood cultures only                                                                    | 5 (2.1)            | 2 (1.4)           | 3 (3.2)       |                |
| Lactate only                                                                           | 16 (6.6)           | 8 (5.5)           | 8 (8.4)       |                |
| Antibiotics + Lactate                                                                  | 24 (10.0)          | 19 (13.0)         | 5 (5.3)       |                |
| Antibiotics + Blood cultures                                                           | 36 (14.9)          | 18 (12.3)         | 18 (18.9)     |                |
| Blood cultures + Lactate                                                               | 7 (2.9)            | 2 (1.4)           | 5 (5.3)       |                |
| Antibiotics + Blood cultures + Lactate                                                 | 108 (44.8)         | 66 (45.2)         | 42 (44.2)     |                |

<sup>a</sup>Comparison between the patients who survived and died using the Chi-squared test; \*Fisher's exact test; \*\*Mann-Whitney U test.

Abbreviations: **no.**: number.

**Table S7.** Life-sustaining treatments during ICU stay and outcomes according to hospital survivability of patients with sepsis

| Variable                                                    | All cases<br>n=252     | Survived<br>n=151      | Died<br>n=101           | P        |
|-------------------------------------------------------------|------------------------|------------------------|-------------------------|----------|
| <b>Life-sustaining treatments during ICU stay</b>           |                        |                        |                         |          |
| Respiratory support, no. (%) and median (IQR), days         |                        |                        |                         |          |
| Mechanical ventilation                                      | 173/251<br>(68.9)      | 82/150<br>(54.7)       | 91/101<br>(90.1)        | <0.001   |
| Duration of mechanical ventilation                          | 8 (4-15)               | 9 (4-15)               | 7(3-14)                 | 0.153**  |
| Non-invasive ventilation                                    | 20/251 (8.0)           | 13/150 (8.7)           | 7/101 (6.9)             | 0.618    |
| Duration of non-invasive ventilation                        | 2 (2-3.75)             | 2 (1-2)                | 5 (2-7)                 | 0.004**  |
| High-flow nasal oxygen                                      | 38/251<br>(15.1)       | 29/150<br>(19.3)       | 9/101 (8.9)             | 0.024    |
| Duration of high-flow nasal oxygen                          | 2 (1-3)                | 2 (1-3)                | 2 (1-3)                 | >0.999** |
| Additional ICU support, no. (%)                             |                        |                        |                         |          |
| Vasopressors/inotropes                                      | 163 (64.7)             | 82 (54.3)              | 81 (80.2)               | <0.001   |
| Renal replacement therapy                                   | 101/251<br>(40.2)      | 43/150<br>(28.7)       | 58/101<br>(57.4)        | <0.001   |
| Red blood cell transfusion                                  | 93/251<br>(37.1)       | 48/150<br>(32.0)       | 45/101<br>(44.6)        | 0.043    |
| Platelet transfusion                                        | 50/251<br>(19.9)       | 20/150<br>(13.3)       | 30/101<br>(29.7)        | 0.001    |
| Fresh frozen plasma transfusion                             | 58/251<br>(23.1)       | 28/150<br>(18.7)       | 30/101<br>(29.7)        | 0.042    |
| Surgical source control                                     | 25/251<br>(10.0)       | 19/150<br>(12.7)       | 6/101 (5.9)             | 0.081*   |
| Non-surgical source control                                 | 78/251<br>(31.1)       | 54/150<br>(36.0)       | 24/101<br>(23.8)        | 0.040    |
| Length of of surgical source control, median (IQR), minutes | 295.0<br>(190.0-637.5) | 290.0<br>(105.0-630.0) | 430.0<br>(270.0-1587.5) | 0.241**  |
| Length of of surgical source control, n (%)                 | n=24                   | n=19                   | n=5                     | 0.208*   |
| <12 hours                                                   | 23 (95.8)              | 19 (100)               | 4 (80.0)                |          |
| 12-24 hours                                                 | 1 (4.2)                | 0 (0.0)                | 1 (20.0)                |          |
| >24 hours                                                   | 0 (0.0)                | 0 (0.0)                | 0 (0.0)                 |          |
| <b>Outcomes</b>                                             |                        |                        |                         |          |
| Patient status, no. (%)                                     |                        |                        |                         | <0.001*  |

|                                                                                              |            |               |           |         |
|----------------------------------------------------------------------------------------------|------------|---------------|-----------|---------|
| Alive upon current hospital discharge                                                        | 150 (59.5) | 150 (99.3)    | 0 (0.0)   |         |
| Alive upon discharge from current ICU stay, but died in current hospital stay                | 17 (6.7)   | 0 (0.0)       | 17 (16.8) |         |
| Alive upon discharge from current ICU stay, but still in current hospital stay after 90 days | 1 (0.4)    | 1 (0.7)       | 0 (0.0)   |         |
| Still in current ICU stay after 90 days                                                      | 0 (0.0)    | 0 (0.0)       | 0 (0.0)   |         |
| Died in current ICU stay                                                                     | 84 (33.3)  | 0 (0.0)       | 84 (83.2) |         |
| Length of stay, median days (IQR)                                                            |            |               |           |         |
| Hospital                                                                                     | 16 (10-25) | 17 (11-24.25) | 13 (7-26) | 0.027** |
| ICU                                                                                          | 10 (6-18)  | 10.5 (6-17)   | 10 (5-21) | 0.740** |

<sup>a</sup>Comparison between the patients who survived and died using the Chi-squared test; \*Fisher's exact test;

\*\*Mann–Whitney U test.

Abbreviations: **ICU**: intensive care unit; **IQR**: interquartile range; **no.**: number.

**Table S8.** Hospital and intensive care unit characteristics according to intensive care unit survivability of patients with sepsis

| Variable                             | All cases<br>n=252 | Survived<br>n=168 | Died<br>n=84 | p <sup>a</sup> |
|--------------------------------------|--------------------|-------------------|--------------|----------------|
| Participating hospital, no. (%)      |                    |                   |              | NA             |
| 115 People's                         | 25 (9.9)           | 7 (4.2)           | 18 (21.4)    |                |
| Bach Mai                             | 26 (10.3)          | 16 (9.5)          | 10 (11.9)    |                |
| Bai Chay                             | 14 (5.6)           | 10 (6.0)          | 4 (4.8)      |                |
| Can Tho                              | 7 (2.8)            | 4 (2.4)           | 3 (3.6)      |                |
| Cho Ray                              | 41 (16.3)          | 22 (13.1)         | 19 (22.6)    |                |
| Da Nang                              | 12 (4.8)           | 6 (3.6)           | 6 (7.1)      |                |
| Dong Da                              | 9 (3.6)            | 6 (3.6)           | 3 (3.6)      |                |
| Hanoi Medical University             | 12 (4.8)           | 6 (3.6)           | 6 (7.1)      |                |
| Hue                                  | 39 (15.5)          | 31 (18.5)         | 8 (9.5)      |                |
| Saint Paul                           | 9 (3.6)            | 9 (5.4)           | 0 (0.0)      |                |
| Thai Nguyen                          | 2 (0.8)            | 1 (0.6)           | 1 (1.2)      |                |
| Thanh Nhan                           | 1 (0.4)            | 1 (0.6)           | 0 (0.0)      |                |
| Vietnam–Czechoslovakia<br>Friendship | 48 (19.0)          | 42 (25.0)         | 6 (7.1)      |                |
| Vinmec Times City International      | 7 (2.8)            | 7 (4.2)           | 0 (0.0)      |                |
| <b>Hospital characteristics</b>      |                    |                   |              |                |
| Type of hospital, no. (%)            |                    |                   |              | NA             |

|                                       |            |            |           |       |
|---------------------------------------|------------|------------|-----------|-------|
| Rural                                 | 0 (0.0)    | 0 (0.0)    | 0 (0.0)   |       |
| Urban                                 | 252 (100)  | 168 (100)  | 84 (100)  |       |
| University affiliation, no. (%)       |            |            |           | 0.003 |
| No                                    | 153 (60.7) | 113 (67.3) | 40 (47.6) |       |
| Yes                                   | 99 (39.3)  | 55 (32.7)  | 44 (52.4) |       |
| <b>ICU characteristics</b>            |            |            |           |       |
| Nature of ICU, no. (%)                |            |            |           | NA    |
| Open                                  | 0 (0.0)    | 0 (0.0)    | 0 (0.0)   |       |
| Closed                                | 252 (100)  | 168 (100)  | 84 (100)  |       |
| Type of ICU, no. (%)                  |            |            |           | 0.857 |
| Medical                               | 110 (43.7) | 74 (44.0)  | 36 (42.9) |       |
| Surgical                              | 0 (0.0)    | 0 (0.0)    | 0 (0.0)   |       |
| Mixed                                 | 142 (56.3) | 94 (56.0)  | 48 (57.1) |       |
| Nurse to patient ratio, no. (%)       |            |            |           | 0.124 |
| 1 or more nurses : 1 patient          | 7 (2.8)    | 7 (4.2)    | 0 (0.0)   |       |
| 1 nurse : 2 patients                  | 187 (74.2) | 120 (71.4) | 67 (79.8) |       |
| 1 nurse : 3 patients                  | 0 (0.0)    | 0 (0.0)    | 0 (0.0)   |       |
| 1 nurse : 4 or more patients          | 58 (23.0)  | 41 (24.4)  | 17 (20.2) |       |
| Intensivist to patient ratio, no. (%) |            |            |           | 0.077 |
| 1 intensivist : 5 or fewer patients   | 165 (65.5) | 105 (62.5) | 60 (71.4) |       |
| 1 intensivist : 6 to 8 patients       | 75 (29.8)  | 57 (33.9)  | 18 (21.4) |       |
| 1 intensivist : 9 to 11 patients      | 0 (0.0)    | 0 (0.0)    | 0 (0.0)   |       |
| 1 intensivist : 12 to 14 patients     | 12 (4.8)   | 6 (3.6)    | 6 (7.1)   |       |
| Training programme in ICU, no. (%)    |            |            |           | 0.014 |
| No                                    | 50 (19.8)  | 26 (15.5)  | 24 (28.6) |       |
| Yes                                   | 202 (80.2) | 142 (84.5) | 60 (71.4) |       |

<sup>a</sup>Comparison between the patients who survived and died using the Chi-squared test; \*Fisher's exact test; \*\*Mann-Whitney U test.

Abbreviations: ICU, intensive care unit; NA, not available; no., number.

**Table S9.** Baseline characteristics according to intensive care unit survivability of patients with sepsis

| Variable                 | All cases<br>n=252 | Survived<br>n=168 | Died<br>n=84 | p <sup>a</sup>      |
|--------------------------|--------------------|-------------------|--------------|---------------------|
| Age (year), median (IQR) | 65 (52-76.75)      | 65 (52-76)        | 65 (52-77)   | 0.971 <sup>**</sup> |
| Age (year), no. (%)      |                    |                   |              | 0.844 <sup>*</sup>  |
| < 20                     | 3 (1.2)            | 2 (1.2)           | 1 (1.2)      |                     |
| 20 - 39                  | 19 (7.5)           | 11 (6.5)          | 8 (9.5)      |                     |
| 40 - 59                  | 74 (29.4)          | 49 (29.2)         | 25 (29.8)    |                     |
| ≥ 60                     | 156 (61.9)         | 106 (63.1)        | 50 (59.5)    |                     |
| Sex (male), no. (%)      | 162 (64.3)         | 104 (61.9)        | 58 (69.0)    | 0.265               |

|                              |            |            |           |         |
|------------------------------|------------|------------|-----------|---------|
| Collection batch, no. (%)    |            |            |           | 0.034   |
| Collection 1 (Jan)           | 80 (31.7)  | 61 (36.3)  | 19 (22.6) |         |
| Collection 2 (April)         | 62 (24.6)  | 33 (19.6)  | 29 (34.5) |         |
| Collection 3 (July)          | 54 (21.4)  | 35 (20.8)  | 19 (22.6) |         |
| Collection 4 (Oct)           | 56 (22.2)  | 39 (23.2)  | 17 (20.2) |         |
| Admission type, no. (%)      |            |            |           | 0.393*  |
| Medical                      | 236 (93.7) | 155 (92.3) | 81 (96.4) |         |
| Elective surgical            | 2 (0.8)    | 2 (1.2)    | 0 (0.0)   |         |
| Unscheduled surgical         | 14 (5.6)   | 11 (6.5)   | 3 (3.6)   |         |
| Admission source, no. (%)    |            |            |           | 0.351*  |
| Emergency department         | 138 (54.8) | 94 (56.0)  | 44 (52.4) |         |
| Operating room               | 4 (1.6)    | 3 (1.8)    | 1 (1.2)   |         |
| General wards                | 56 (22.2)  | 39 (23.2)  | 17 (20.2) |         |
| Other ICUs or HDU            | 16 (6.3)   | 12 (7.1)   | 4 (4.8)   |         |
| Inter-hospital transfer      | 37 (14.7)  | 20 (11.9)  | 17 (20.2) |         |
| Others                       | 1 (0.4)    | 0 (0.0)    | 1 (1.2)   |         |
| Comorbidities, no. (%)       |            |            |           |         |
| Cardiovascular disease       | 78 (31.0)  | 47 (28.0)  | 31 (36.9) | 0.148   |
| Chronic lung disease         | 30 (11.9)  | 21 (12.5)  | 9 (10.7)  | 0.680   |
| Chronic neurological disease | 36 (14.3)  | 28 (16.7)  | 8 (9.5)   | 0.127   |
| Chronic kidney disease       | 23 (9.1)   | 16 (9.5)   | 7 (8.3)   | 0.757   |
| Peptic ulcer disease         | 9 (3.6)    | 6 (3.6)    | 3 (3.6)   | >0.999* |
| Chronic liver disease        | 27 (10.7)  | 17 (10.1)  | 10 (11.9) | 0.670   |
| Diabetes mellitus            | 67 (26.6)  | 44 (26.2)  | 23 (27.4) | 0.840   |
| HIV infection                | 0 (0.0)    | 0 (0.0)    | 0 (0.0)   | NA      |
| Connective tissue disease    | 3 (1.2)    | 2 (1.2)    | 1 (1.2)   | >0.999* |
| Immunosuppression            | 10 (4.0)   | 7 (4.2)    | 3 (3.6)   | >0.999* |
| Haematological malignancies  | 5 (2.0)    | 3 (1.8)    | 2 (2.4)   | >0.999* |
| Solid malignant tumours      | 12 (4.8)   | 6 (3.6)    | 6 (7.1)   | 0.222   |

<sup>a</sup>Comparison between the patients who survived and died using the Chi-squared test; \*Fisher's exact test; \*\*Mann–Whitney U test.

Abbreviations: **HIV**, human immunodeficiency virus; **ICU**, intensive care unit; **IQR**, interquartile range; **NA**, not available; **no.**, number.

**Table S10.** Clinical and laboratory characteristics and severity of illness according to intensive care unit survivability of patients with sepsis

| Variable                                   | All cases<br>n=252 | Survived<br>n=168 | Died<br>n=84    | p <sup>a</sup> |
|--------------------------------------------|--------------------|-------------------|-----------------|----------------|
| <b>Vital signs</b> (on admission into ICU) |                    |                   |                 |                |
| GCS, median (IQR)                          | 13 (9-15)          | 14 (10-15)        | 10 (8-14)       | <0.001**       |
| HR (beats per min), median (IQR)           | 110 (95.25-125.75) | 109 (92-121)      | 111.5 (100-130) | 0.008**        |

|                                                     |                    |                    |                    |          |
|-----------------------------------------------------|--------------------|--------------------|--------------------|----------|
| Temperature (°C), mean (SD)                         | 37.79 (1.01)       | 37.82 (1.07)       | 37.72 (0.88)       | 0.485**  |
| MBP (mmHg), mean (SD)                               | 75.82<br>(22.08)   | 78.95<br>(22.80)   | 69.54<br>(19.21)   | 0.001**  |
| SBP (mmHg), mean (SD)                               | 106.45<br>(29.96)  | 110.64<br>(29.48)  | 98.08<br>(29.33)   | 0.002**  |
| RR (breaths per min), median (IQR)                  | 25 (22-30)         | 25 (22-30)         | 25 (20.25-30)      | >0.999** |
| <b>Blood investigations</b>                         |                    |                    |                    |          |
| Total WBC (x10 <sup>9</sup> /L), mean (SD)          | 15.73 (9.20)       | 15.70 (8.64)       | 15.79<br>(10.28)   | 0.941**  |
| PLT (x10 <sup>9</sup> /L), mean (SD)                | 185.98<br>(137.85) | 203.72<br>(131.99) | 150.49<br>(143.17) | 0.004**  |
| Hb (g/dL), mean (SD)                                | 11.14 (2.59)       | 11.33 (2.62)       | 10.77 (2.50)       | 0.104**  |
| Hct (%), mean (SD)                                  | 34.31 (7.75)       | 34.85 (7.76)       | 33.24 (7.67)       | 0.122**  |
| K <sup>+</sup> (mmol/L), mean (SD)                  | 3.89 (0.79)        | 3.89 (0.80)        | 3.87 (0.77)        | 0.838**  |
| Na <sup>+</sup> (mmol/L), mean (SD)                 | 136.05<br>(8.24)   | 135.21<br>(8.72)   | 137.74<br>(6.92)   | 0.021**  |
| Creatinine (μmol/L), mean (SD)                      | 187.85<br>(151.92) | 188.47<br>(169.24) | 186.60<br>(110.29) | 0.927**  |
| Bilirubin (μmol/l), mean (SD)                       | 32.80<br>(61.49)   | 31.40<br>(69.33)   | 35.52<br>(42.65)   | 0.629**  |
| pH, mean (SD)                                       | 7.37 (0.50)        | 7.40 (0.61)        | 7.32 (0.13)        | 0.249**  |
| PaO <sub>2</sub> (mmHg), mean (SD)                  | 116.17<br>(74.28)  | 111.80<br>(64.31)  | 124.49<br>(90.14)  | 0.206**  |
| FiO <sub>2</sub> , mean (SD)                        | 0.50 (0.22)        | 0.45 (0.20)        | 0.57 (0.24)        | <0.001** |
| PaO <sub>2</sub> /FiO <sub>2</sub> ratio, mean (SD) | 262.48<br>(149.58) | 273.45<br>(149.45) | 241.73<br>(148.49) | 0.116**  |
| <b>Severity of illness scores</b>                   |                    |                    |                    |          |
| qSOFA, median (IQR)                                 | 2 (1-2)            | 2 (1-2)            | 2 (2-3)            | 0.001**  |
| qSOFA, no. (%)                                      |                    |                    |                    | 0.036    |
| 0 - 1                                               | 69 (27.4)          | 53 (31.5)          | 16 (19.0)          |          |
| 2 - 3                                               | 183 (72.6)         | 115 (68.5)         | 68 (81.0)          |          |
| SIRS, median (IQR)                                  | 3 (2-4)            | 3 (3-3.75)         | 3 (2-4)            | 0.792**  |
| SOFA, median (IQR)                                  | 7 (4.75-10)        | 6 (4-9)            | 10 (7-12.75)       | <0.001** |
| SOFA, no. (%)                                       |                    |                    |                    | <0.001   |
| 0 - 1                                               | 0 (0.0)            | 0 (0.0)            | 0 (0.0)            |          |
| 2 - 3                                               | 46 (18.4)          | 38 (22.9)          | 8 (9.5)            |          |
| 4 - 5                                               | 36 (14.4)          | 29 (17.5)          | 7 (8.3)            |          |
| 6 - 7                                               | 58 (23.2)          | 46 (27.7)          | 12 (14.3)          |          |
| 8 - 9                                               | 32 (12.8)          | 20 (12.0)          | 12 (14.3)          |          |
| 10 - 11                                             | 38 (15.2)          | 21 (12.7)          | 17 (20.2)          |          |
| 12 - 14                                             | 29 (11.6)          | 9 (5.4)            | 20 (23.8)          |          |

|                         |            |            |               |                      |
|-------------------------|------------|------------|---------------|----------------------|
| > 14                    | 11 (4.4)   | 3 (1.8)    | 8 (9.5)       |                      |
| SOFA, no. (%)           |            |            |               | <0.001               |
| < 10                    | 172 (68.8) | 120 (80.5) | 52 (51.5)     |                      |
| ≥ 10 <sup>b</sup>       | 78 (31.2)  | 29 (19.5)  | 49 (48.5)     |                      |
| APACHE II, median (IQR) | 18 (13-24) | 16 (12-22) | 22 (16.25-27) | <0.001 <sup>**</sup> |
| APACHE II, no. (%)      |            |            |               | <0.001               |
| 0 - 4                   | 3 (1.2)    | 3 (1.8)    | 0 (0.0)       |                      |
| 5 - 9                   | 22 (8.7)   | 17 (10.1)  | 5 (6.0)       |                      |
| 10 - 14                 | 61 (24.2)  | 52 (31.0)  | 9 (10.7)      |                      |
| 15 - 19                 | 52 (20.6)  | 36 (21.4)  | 16 (19.0)     |                      |
| 20 - 24                 | 58 (23.0)  | 32 (19.0)  | 26 (31.0)     |                      |
| 25 - 29                 | 28 (11.1)  | 11 (6.5)   | 17 (20.2)     |                      |
| 30 - 34                 | 19 (7.5)   | 13 (7.7)   | 6 (7.1)       |                      |
| > 34                    | 9 (3.6)    | 4 (2.4)    | 5 (6.0)       |                      |
| APACHE II, no. (%)      |            |            |               | <0.001               |
| < 19                    | 129 (51.2) | 97 (64.2)  | 32 (31.7)     |                      |
| ≥ 19 <sup>b</sup>       | 123 (48.8) | 54 (35.8)  | 69 (68.3)     |                      |
| Septic Shock            | 74 (29.4)  | 43 (25.6)  | 31 (36.9)     | 0.063                |

<sup>a</sup>Comparison between the patients who survived and died using the Chi-squared test; <sup>\*</sup>Fisher's exact test;

<sup>\*\*</sup>Mann-Whitney U test.

<sup>b</sup>The cut-off value of the SOFA or APACHE II score, which was determined by receiver operator characteristic curve analysis, for predicting death in the intensive care unit.

**Abbreviations:** **APACHE II:** Acute Physiology and Chronic Health Evaluation II Score; **FiO<sub>2</sub>:** fraction of inspired oxygen; **GCS:** Glasgow Coma Scale; **Hb:** haemoglobin; **HR:** heart rate; **ICU:** intensive care unit; **IQR:** interquartile range; **MBP:** mean blood pressure; **no.:** number; **PaO<sub>2</sub>:** partial pressure of oxygen in the arterial blood; **PLT:** platelet count; **RR:** respiratory rate; **SD:** standard deviation; **SOFA:** Sequential Organ Failure Assessment Score; **WBC:** white blood cell.

**Table S11.** Sites of infection and microbiology according to intensive care unit survivability of patients with sepsis

| Variable                         | All cases<br>n=252 | Survived<br>n=168 | Died<br>n=84 | p <sup>a</sup>      |
|----------------------------------|--------------------|-------------------|--------------|---------------------|
| <b>Site of Infection</b>         |                    |                   |              |                     |
| Respiratory, no. (%)             | 143 (56.7)         | 93 (55.4)         | 50 (59.5)    | 0.529               |
| Urinary tract, no. (%)           | 37 (14.7)          | 31 (18.5)         | 6 (7.1)      | 0.017               |
| Abdominal, no. (%)               | 61 (24.2)          | 37 (22.0)         | 24 (28.6)    | 0.253               |
| Neurological, no. (%)            | 12 (4.8)           | 9 (5.4)           | 3 (3.6)      | 0.756 <sup>*</sup>  |
| Bones or joints, no. (%)         | 2 (0.8)            | 2 (1.2)           | 0 (0.0)      | 0.554 <sup>*</sup>  |
| Skin or cutaneous sites, no. (%) | 19 (7.5)           | 9 (5.4)           | 10 (11.9)    | 0.063               |
| Intravascular catheter, no. (%)  | 1 (0.4)            | 1 (0.6)           | 0 (0.0)      | >0.999 <sup>*</sup> |
| Infective endocarditis, no. (%)  | 1 (0.4)            | 0 (0.0)           | 1 (1.2)      | 0.333 <sup>*</sup>  |
| Primary bacteraemia, no. (%)     | 7 (2.8)            | 6 (3.6)           | 1 (1.2)      | 0.430 <sup>*</sup>  |

|                                     |            |            |           |         |
|-------------------------------------|------------|------------|-----------|---------|
| Systemic, no. (%)                   | 6 (2.4)    | 4 (2.4)    | 2 (2.4)   | >0.999* |
| <b>Microbiology</b>                 |            |            |           |         |
| No pathogens detected, no. (%)      | 67 (26.6)  | 50 (29.8)  | 17 (20.2) | 0.107   |
| Gram negative bacteria, no. (%)     | 156 (61.9) | 101 (60.1) | 55 (65.5) | 0.409   |
| <i>Klebsiella pneumonia</i>         | 27 (10.7)  | 17 (10.1)  | 10 (11.9) | 0.666   |
| <i>Acinetobacter baumannii</i>      | 45 (17.9)  | 24 (14.3)  | 21 (25.0) | 0.036   |
| <i>Escherichia coli</i>             | 44 (17.5)  | 31 (18.5)  | 13 (15.5) | 0.557   |
| <i>Pseudomonas aeruginosa</i>       | 24 (9.5)   | 18 (10.7)  | 6 (7.1)   | 0.363   |
| <i>Stenotrophomonas maltophilia</i> | 2 (0.8)    | 1 (0.6)    | 1 (1.2)   | >0.999* |
| <i>Proteus species</i>              | 47 (18.7)  | 30 (17.9)  | 17 (20.2) | 0.647   |
| <i>Enterobacter cloacae</i>         | 3 (1.2)    | 3 (1.8)    | 0 (0.0)   | 0.553*  |
| <i>Bulkholderia pseudomallei</i>    | 1 (0.4)    | 1 (0.6)    | 0 (0.0)   | >0.999  |
| <i>Other</i>                        | 0 (0.0)    | 0 (0.0)    | 0 (0.0)   | NA      |
| Gram positive bacteria, no. (%)     | 34 (13.5)  | 23 (13.7)  | 11 (13.1) | 0.896   |
| <i>Enterococcus</i>                 | 5 (2.0)    | 5 (3.0)    | 0 (0.0)   | 0.173*  |
| <i>MSSA</i>                         | 5 (2.0)    | 3 (1.8)    | 2 (2.4)   | >0.999* |
| <i>MRSA</i>                         | 10 (4.0)   | 7 (4.2)    | 3 (3.6)   | >0.999* |
| <i>Other Streptococcus species</i>  | 12 (4.8)   | 6 (3.6)    | 6 (7.1)   | 0.222*  |
| <i>Streptococcus pneumonia</i>      | 2 (0.8)    | 2 (1.2)    | 0 (0.0)   | 0.554*  |
| Fungi, no. (%)                      | 7 (2.8)    | 4 (2.4)    | 3 (3.6)   | 0.689*  |
| <i>Candida species</i>              | 7 (2.8)    | 4 (2.4)    | 3 (3.6)   | 0.689*  |
| <i>Aspergillus species</i>          | 0 (0.0)    | 0 (0.0)    | 0 (0.0)   | NA      |
| <i>Others</i>                       | 0 (0.0)    | 0 (0.0)    | 0 (0.0)   | NA      |
| Viruses, no. (%)                    | 2 (0.8)    | 0 (0.0)    | 2 (2.4)   | 0.110*  |
| <i>Influenza</i>                    | 1 (0.4)    | 0 (0.0)    | 1 (1.2)   | 0.333*  |
| <i>Others</i>                       | 0 (0.0)    | 0 (0.0)    | 0 (0.0)   | NA      |
| <i>Dengue</i>                       | 1 (0.4)    | 0          | 1 (1.2)   | 0.333*  |
| Other pathogens, no. (%)            |            |            |           |         |
| <i>Anaerobes</i>                    | 0 (0.0)    | 0 (0.0)    | 0 (0.0)   | NA      |
| <i>Mycobacterium tuberculosis</i>   | 4 (1.6)    | 3 (1.8)    | 1 (1.2)   | >0.999* |
| <i>Malaria</i>                      | 0 (0.0)    | 0 (0.0)    | 0 (0.0)   | NA      |

\*Comparison between the patients who survived and died using the Chi-squared test; \*Fisher's exact test; \*\*Mann-Whitney U test.

Abbreviations: **MRSA**: methicillin-resistant *Staphylococcus aureus*; **MSSA**: methicillin-susceptible *Staphylococcus aureus*; **NA**, not available; **no.**, number.

**Table S12.** Completion of sepsis bundle elements according to intensive care unit survivability of patients with sepsis

| Variable                                    | All cases<br>n=252 | Survived<br>n=168 | Died<br>n=84 | p <sup>a</sup> |
|---------------------------------------------|--------------------|-------------------|--------------|----------------|
| <b>Timing of antibiotics administration</b> |                    |                   |              |                |
| Performed within 24 hours, no. (%)          |                    |                   |              | 0.686          |



|                                                                |                 |               |               |         |
|----------------------------------------------------------------|-----------------|---------------|---------------|---------|
| 0-60 minutes                                                   | 173 (76.9)      | 120 (77.4)    | 53 (75.7)     |         |
| 61-120 minutes                                                 | 21 (9.3)        | 14 (9.0)      | 7 (10.0)      |         |
| 121-180 minutes                                                | 14 (6.2)        | 11 (7.1)      | 3 (4.3)       |         |
| >180 minutes                                                   | 17 (7.6)        | 10 (6.5)      | 7 (10.0)      |         |
| Not performed within 24 hours, no. (%)                         | 0 (0.0)         | 0 (0.0)       | 0 (0.0)       | NA      |
| Timing of antibiotics administration, median (IQR), minutes    | 30 (11-60)      | 35 (15-60)    | 30 (10-61.25) | 0.590** |
| <b>Timing of obtaining blood cultures</b>                      |                 |               |               |         |
| Performed within 24 hours, no. (%)                             | n=197           | n=128         | n=69          | 0.545*  |
| 0-60 minutes                                                   | 135 (68.5)      | 87 (68.0)     | 48 (69.6)     |         |
| 61-120 minutes                                                 | 14 (7.1)        | 7 (5.5)       | 7 (10.1)      |         |
| 121-180 minutes                                                | 10 (5.1)        | 7 (5.5)       | 3 (4.3)       |         |
| >180 minutes                                                   | 38 (19.3)       | 27 (21.1)     | 11 (15.9)     |         |
| Not performed within 24 hours, no. (%)                         | 0 (0.0)         | 0 (0.0)       | 0 (0.0)       | NA      |
| Timing of obtaining blood cultures, median (IQR), minutes      | 30.0 (15-114.5) | 30 (15-133.5) | 30 (10-90)    | 0.371** |
| <b>Timing of obtaining lactate measurement</b>                 |                 |               |               |         |
| Performed within 24 hours, no. (%)                             | n=198           | n=135         | n=63          | 0.827*  |
| 0-60 minutes                                                   | 141 (71.2)      | 95 (70.4)     | 46 (73.0)     |         |
| 61-120 minutes                                                 | 10 (5.1)        | 6 (4.4)       | 4 (6.3)       |         |
| 121-180 minutes                                                | 6 (3.0)         | 5 (3.7)       | 1 (1.6)       |         |
| >180 minutes                                                   | 41 (20.7)       | 29 (21.5)     | 12 (19.0)     |         |
| Not performed within 24 hours, no. (%)                         | 0 (0.0)         | 0 (0.0)       | 0 (0.0)       | NA      |
| Timing of obtaining lactate measurement, median (IQR), minutes | 30 (10-92)      | 30 (11-159)   | 30 (10-75)    | 0.381** |

<sup>a</sup>Comparison between the patients who survived and died using the Chi-squared test; \*Fisher's exact test;

\*\*Mann-Whitney U test.

Abbreviations: **IQR**: interquartile range; **NA**, not available; **no.**: number.

**Table S13.** Completion of the sepsis bundle of care and the initial administration of antibiotics according to intensive care unit survivability of patients with sepsis

| Variable                                                                              | All cases<br>n=252 | Survived<br>n=168 | Died<br>n=84 | p <sup>a</sup> |
|---------------------------------------------------------------------------------------|--------------------|-------------------|--------------|----------------|
| Completion of the sepsis bundle within 1 hour, no. (%), n=241                         | 87 (36.1)          | 59 (36.6)         | 28 (35.0)    | 0.802          |
| Completion of the initial administration of antibiotics within 1 hour, no. (%), n=241 | 173 (71.8)         | 120 (74.5)        | 53 (66.3)    | 0.178          |

|                                                                                        |            |            |           |        |
|----------------------------------------------------------------------------------------|------------|------------|-----------|--------|
| Permutations of the completed elements within 1 hour, no. (%)                          | n=241      | n=161      | n=80      | 0.311  |
| No elements completed                                                                  | 20 (8.3)   | 13 (8.1)   | 7 (8.8)   |        |
| Antibiotics only                                                                       | 44 (18.3)  | 32 (19.9)  | 12 (15.0) |        |
| Blood cultures only                                                                    | 13 (5.4)   | 9 (5.6)    | 4 (5.0)   |        |
| Lactate only                                                                           | 23 (9.5)   | 12 (7.5)   | 11 (13.8) |        |
| Antibiotics + Lactate                                                                  | 17 (7.1)   | 15 (9.3)   | 2 (2.5)   |        |
| Antibiotics + Blood cultures                                                           | 25 (10.4)  | 14 (8.7)   | 11 (13.8) |        |
| Blood cultures + Lactate                                                               | 12 (5.0)   | 7 (4.3)    | 5 (6.3)   |        |
| Antibiotics + Blood cultures + Lactate                                                 | 87 (36.1)  | 59 (36.6)  | 28 (35.0) |        |
| Completion of the sepsis bundle within 3 hours, no. (%), n=241                         | 108 (44.8) | 73 (45.3)  | 35 (43.8) | 0.815  |
| Completion of the initial administration of antibiotics within 3 hours, no. (%), n=241 | 205 (85.1) | 143 (88.8) | 62 (77.5) | 0.020  |
| Permutation of the completed elements of 3-hour sepsis bundle, no. (%)                 | n=241      | n=161      | n=80      | 0.089* |
| No elements completed                                                                  | 8 (3.3)    | 4 (2.5)    | 4 (5.0)   |        |
| Antibiotics only                                                                       | 37 (15.4)  | 29 (18.0)  | 8 (10.0)  |        |
| Blood cultures only                                                                    | 5 (2.1)    | 2 (1.2)    | 3 (3.8)   |        |
| Lactate only                                                                           | 16 (6.6)   | 9 (5.6)    | 7 (8.8)   |        |
| Antibiotics + Lactate                                                                  | 24 (10.0)  | 20 (12.4)  | 4 (5.0)   |        |
| Antibiotics + Blood cultures                                                           | 36 (14.9)  | 21 (13.0)  | 15 (18.8) |        |
| Blood cultures + Lactate                                                               | 7 (2.9)    | 3 (1.9)    | 4 (5.0)   |        |
| Antibiotics + Blood cultures + Lactate                                                 | 108 (44.8) | 73 (45.3)  | 35 (43.8) |        |

\*Comparison between the patients who survived and died using the Chi-squared test; \*Fisher's exact test; \*\*Mann-Whitney U test.

Abbreviations: **no.**: number.

**Table S14.** Life-sustaining treatments during ICU stay and outcomes according to intensive care unit survivability of patients with sepsis

| Variable                                            | All cases<br>n=252 | Survived<br>n=168 | Died<br>n=84 | p <sup>a</sup> |
|-----------------------------------------------------|--------------------|-------------------|--------------|----------------|
| <b>Life-sustaining treatments during ICU stay</b>   |                    |                   |              |                |
| Respiratory support, no. (%) and median (IQR), days |                    |                   |              |                |
| Mechanical ventilation                              | 173/251<br>(68.9)  | 97/167<br>(58.1)  | 76/84 (90.5) | <0.001         |
| Duration of mechanical                              | 8 (4-15)           | 9 (4-15)          | 7 (3-15)     | 0.502**        |

|                                                                                              |                |               |                |         |
|----------------------------------------------------------------------------------------------|----------------|---------------|----------------|---------|
| ventilation                                                                                  |                |               |                |         |
| Non-invasive ventilation                                                                     | 20/251 (8.0)   | 14 (8.4)      | 6 (7.1)        | 0.732   |
| Duration of non-invasive ventilation                                                         | 2 (2-3.75)     | 2 (1-2)       | 5 (3.5-11.25)  | 0.002** |
| High-flow nasal oxygen                                                                       | 38/251 (15.1)  | 33/167 (19.8) | 5/84 (6.0)     | 0.004   |
| Duration of high-flow nasal oxygen                                                           | 2 (1-3)        | 2 (1-3)       | 3 (2.25-11.25) | 0.146   |
| Additional ICU support, no. (%)                                                              |                |               |                |         |
| Vasopressors/inotropes                                                                       | 163 (64.7)     | 96 (57.1)     | 67 (79.8)      | <0.001  |
| Renal replacement therapy                                                                    | 101/251 (40.2) | 48/167 (28.7) | 43/84 (63.1)   | <0.001  |
| Red blood cell transfusion                                                                   | 93/251 (37.1)  | 55/167 (32.9) | 38/84 (45.2)   | 0.057   |
| Platelet transfusion                                                                         | 50/251 (19.9)  | 23/167 (13.8) | 27/84 (32.1)   | 0.001   |
| Fresh frozen plasma transfusion                                                              | 58/251 (23.1)  | 32/167 (19.2) | 26/84 (31.0)   | 0.037   |
| Surgical source control                                                                      | 25/251 (10.0)  | 19/167 (11.4) | 6/84 (7.1)     | 0.290   |
| Non-surgical source control                                                                  | 78/251 (31.1)  | 59/167 (35.3) | 19/84 (22.6)   | 0.040   |
| Length of of surgical source control, median (IQR), minutes                                  | 290 (105-630)  | 290 (105-630) | 430 (270-1587) | 0.241** |
| Length of of surgical source control, n (%)                                                  | n=24           | n=19          | n=5            | 0.208   |
| <12 hours                                                                                    | 23 (95.8)      | 19 (100)      | 4 (80.0)       |         |
| 12-24 hours                                                                                  | 1 (4.2)        | 0 (0.0)       | 1 (20.0)       |         |
| >24 hours                                                                                    | 0 (0.0)        | 0 (0.0)       | 0 (0.0)        |         |
| <b>Outcomes</b>                                                                              |                |               |                |         |
| Patient status, no. (%)                                                                      |                |               |                | <0.001* |
| Alive upon current hospital discharge                                                        | 150 (59.5)     | 150 (89.3)    | 0 (0.0)        |         |
| Alive upon discharge from current ICU stay, but died in current hospital stay                | 17 (6.7)       | 17 (10.1)     | 0 (0.0)        |         |
| Alive upon discharge from current ICU stay, but still in current hospital stay after 90 days | 1 (0.4)        | 1 (0.6)       | 0 (0.0)        |         |
| Still in current ICU stay after 90 days                                                      | 0 (0.0)        | 0 (0.0)       | 0 (0.0)        |         |
| Died in current ICU stay, no.                                                                | 84 (33.3)      | 0 (0.0)       | 84 (100)       |         |

|                                   |            |            |             |         |
|-----------------------------------|------------|------------|-------------|---------|
| (%)                               |            |            |             |         |
| Mortality, no. (%)                |            |            |             |         |
| Hospital                          | 101 (40.1) | 17 (10.1)  | 84 (100)    | <0.001  |
| Length of stay, median days (IQR) |            |            |             |         |
| Hospital                          | 16 (10-25) | 17 (11-26) | 13 (6-22)   | 0.002** |
| ICU                               | 10 (6-18)  | 10 (6-17)  | 10 (5-20.5) | 0.688** |

<sup>a</sup>Comparison between the patients who survived and died using the Chi-squared test; \*Fisher's exact test;

\*\*Mann–Whitney U test.

Abbreviations: ICU: intensive care unit; IQR: interquartile range; no.: number.

**Table S15.** Factors associated with hospital mortality in patients with sepsis: univariable regression analyses

| Factors                           | Number of patients | OR          | 95.0% CI for OR |        | P      |
|-----------------------------------|--------------------|-------------|-----------------|--------|--------|
|                                   |                    |             | Lower           | Upper  |        |
| Participating hospital            |                    |             |                 |        |        |
| 115 People's                      | 25                 | Ref.        |                 |        | 0.004  |
| Bach Mai                          | 26                 | 0.271       | 0.082           | 0.898  | 0.033  |
| Bai Chay                          | 14                 | 0.126       | 0.029           | 0.554  | 0.006  |
| Can Tho                           | 7                  | 1.895       | 0.189           | 19.039 | 0.587  |
| Cho Ray                           | 41                 | 0.366       | 0.121           | 1.103  | 0.074  |
| Da Nang                           | 12                 | 0.316       | 0.074           | 1.356  | 0.121  |
| Dong Da                           | 9                  | 0.158       | 0.030           | 0.832  | 0.030  |
| Hanoi Medical University          | 12                 | 0.316       | 0.074           | 1.356  | 0.121  |
| Hue                               | 39                 | 0.158       | 0.051           | 0.491  | 0.001  |
| Saint Paul                        | 9                  | 0.000       | 0.000           | NA     | 0.999  |
| Thai Nguyen                       | 2                  | 0.316       | 0.017           | 5.854  | 0.439  |
| Thanh Nhan                        | 1                  | 510149957.2 | 0.000           | NA     | >0.999 |
| Vietnam–Czechoslovakia Friendship | 48                 | 0.063       | 0.019           | 0.208  | <0.001 |
| Vinmec Times City International   | 7                  | 0.000       | 0.000           | NA     | 0.999  |
| <b>Hospital characteristics</b>   |                    |             |                 |        |        |
| University affiliation            |                    |             |                 |        |        |
| No                                | 153                | Ref.        |                 |        | NA     |
| Yes                               | 99                 | 2.520       | 1.495           | 4.248  | 0.001  |
| <b>ICU characteristics</b>        |                    |             |                 |        |        |
| Type of ICU                       |                    |             |                 |        |        |
| Medical                           | 110                | Ref.        |                 |        | NA     |
| Mixed                             | 142                | 1.151       | 0.692           | 1.915  | 0.589  |
| Nurse to patient ratio            |                    |             |                 |        |        |
| 1 nurse : 4 or more patients      | 58                 | Ref.        |                 |        | 0.946  |
| 1 or more nurses : 1 patient      | 7                  | 0.000       | 0.000           | -      | 0.999  |

|                                     |     |            |       |        |        |
|-------------------------------------|-----|------------|-------|--------|--------|
| 1 nurse : 2 patients                | 187 | 0.904      | 0.498 | 1.640  | 0.739  |
| Intensivist to patient ratio        |     |            |       |        |        |
| 1 intensivist : 5 or fewer patients | 165 | Ref.       |       |        | 0.449  |
| 1 intensivist : 6 to 8 patients     | 75  | 0.738      | 0.419 | 1.302  | 0.294  |
| 1 intensivist : 12 or more patients | 12  | 1.391      | 0.430 | 4.497  | 0.581  |
| Training programme in ICU           |     |            |       |        |        |
| No                                  | 50  | Ref.       |       |        | NA     |
| Yes                                 | 202 | 0.445      | 0.237 | 0.833  | 0.011  |
| <b>Baseline characteristics</b>     |     |            |       |        |        |
| Age (year)                          | 252 | 1.001      | 0.986 | 1.016  | 0.921  |
| Age (year) group                    |     |            |       |        |        |
| < 20                                | 3   | Ref.       |       |        | 0.863  |
| 20 - 39                             | 19  | 1.800      | 0.139 | 23.374 | 0.653  |
| 40 - 59                             | 74  | 1.442      | 0.125 | 16.617 | 0.769  |
| ≥ 60                                | 156 | 1.250      | 0.111 | 14.086 | 0.857  |
| Sex (male)                          | 162 | 1.345      | 0.790 | 2.290  | 0.275  |
| Collection batch                    |     |            |       |        |        |
| Collection 1 (Jan)                  | 80  | Ref.       |       |        | 0.008  |
| Collection 2 (April)                | 62  | 3.418      | 1.694 | 6.896  | 0.001  |
| Collection 3 (July)                 | 54  | 1.812      | 0.872 | 3.768  | 0.111  |
| Collection 4 (Oct)                  | 56  | 1.706      | 0.825 | 3.529  | 0.150  |
| Admission type                      |     |            |       |        |        |
| Medical                             | 236 | Ref.       |       |        | 0.355  |
| Elective surgical                   | 2   | 0.000      | 0.000 | NA     | 0.999  |
| Unscheduled surgical                | 14  | 0.384      | 0.104 | 1.413  | 0.150  |
| Admission source                    |     |            |       |        |        |
| Emergency department                | 138 | Ref.       |       |        | 0.714  |
| Operating room                      | 4   | 0.569      | 0.058 | 5.612  | 0.629  |
| General wards                       | 56  | 1.189      | 0.630 | 2.243  | 0.593  |
| Other ICUs or HDU                   | 16  | 1.024      | 0.351 | 2.983  | 0.966  |
| Inter-hospital transfer             | 37  | 1.801      | 0.866 | 3.742  | 0.115  |
| Others                              | 1   | 2755810063 | 0.000 | NA     | >0.999 |
| Comorbidities                       |     |            |       |        |        |
| Cardiovascular disease              | 78  | 1.551      | 0.903 | 2.664  | 0.112  |
| Chronic lung disease                | 30  | 0.996      | 0.458 | 2.169  | 0.992  |
| Chronic neurological disease        | 36  | 0.378      | 0.165 | 0.867  | 0.022  |
| Chronic kidney disease              | 23  | 0.957      | 0.398 | 2.304  | 0.922  |
| Peptic ulcer disease                | 9   | 1.204      | 0.315 | 4.597  | 0.786  |
| Chronic liver disease               | 27  | 1.446      | 0.649 | 3.220  | 0.367  |
| Diabetes mellitus                   | 67  | 1.012      | 0.573 | 1.790  | 0.966  |

|                                          |     |        |       |         |        |
|------------------------------------------|-----|--------|-------|---------|--------|
| Connective tissue disease                | 3   | 0.745  | 0.067 | 8.326   | 0.811  |
| Immunosuppression                        | 10  | 0.630  | 0.159 | 2.495   | 0.510  |
| Haematological malignancies              | 5   | 0.997  | 0.164 | 6.073   | 0.997  |
| Solid malignant tumours                  | 12  | 1.526  | 0.478 | 4.873   | 0.475  |
| <b>Vital signs</b>                       |     |        |       |         |        |
| GCS                                      | 251 | 0.849  | 0.786 | 0.918   | <0.001 |
| HR (beats per min)                       | 252 | 1.010  | 0.997 | 1.022   | 0.140  |
| Temperature (°C)                         | 252 | 0.975  | 0.760 | 1.252   | 0.845  |
| MBP (mmHg)                               | 252 | 0.978  | 0.965 | 0.991   | 0.001  |
| SBP (mmHg)                               | 252 | 0.986  | 0.977 | 0.995   | 0.002  |
| RR (breaths per min)                     | 252 | 0.987  | 0.944 | 1.031   | 0.555  |
| <b>Blood investigations</b>              |     |        |       |         |        |
| Total WBC ( $\times 10^9/L$ )            | 252 | 1.003  | 0.976 | 1.031   | 0.833  |
| PLT ( $\times 10^9/L$ )                  | 252 | 0.998  | 0.996 | 1.000   | 0.040  |
| Hb (g/dL)                                | 251 | 0.922  | 0.835 | 1.018   | 0.109  |
| Hct (%)                                  | 252 | 0.968  | 0.936 | 1.001   | 0.057  |
| K <sup>+</sup> (mmol/L)                  | 252 | 0.961  | 0.697 | 1.324   | 0.805  |
| Na <sup>+</sup> (mmol/L)                 | 252 | 1.016  | 0.985 | 1.048   | 0.313  |
| Creatinine ( $\mu\text{mol/L}$ )         | 252 | 1.000  | 0.999 | 1.002   | 0.828  |
| Bilirubin ( $\mu\text{mol/l}$ )          | 232 | 1.001  | 0.996 | 1.005   | 0.752  |
| pH                                       | 248 | 0.045  | 0.005 | 0.389   | 0.005  |
| PaO <sub>2</sub> (mmHg)                  | 244 | 1.003  | 0.999 | 1.006   | 0.142  |
| FiO <sub>2</sub>                         | 245 | 26.892 | 7.081 | 102.133 | <0.001 |
| PaO <sub>2</sub> /FiO <sub>2</sub> ratio | 243 | 0.998  | 0.996 | 1.000   | 0.020  |
| <b>Severity of illness scores</b>        |     |        |       |         |        |
| qSOFA                                    | 252 | 1.697  | 1.203 | 2.393   | 0.003  |
| qSOFA                                    |     |        |       |         |        |
| 0 - 1                                    | 69  | Ref.   |       |         | NA     |
| 2 - 3                                    | 183 | 1.775  | 0.984 | 3.203   | 0.057  |
| SIRS                                     | 252 | 1.004  | 0.776 | 1.300   | 0.974  |
| SOFA                                     | 250 | 1.219  | 1.130 | 1.315   | <0.001 |
| SOFA                                     |     |        |       |         |        |
| 2 - 3                                    | 46  | Ref.   |       |         | <0.001 |
| 4 - 5                                    | 36  | 0.725  | 0.263 | 2.000   | 0.535  |
| 6 - 7                                    | 58  | 0.886  | 0.371 | 2.114   | 0.784  |
| 8 - 9                                    | 32  | 2.538  | 0.987 | 6.528   | 0.053  |
| 10 - 11                                  | 38  | 2.285  | 0.925 | 5.642   | 0.073  |
| 12 - 14                                  | 29  | 6.663  | 2.363 | 18.793  | <0.001 |
| > 14                                     | 11  | 25.385 | 2.947 | 218.685 | 0.003  |
| SOFA                                     |     |        |       |         |        |
| < 8                                      | 140 | Ref.   |       |         | NA     |
| ≥ 8                                      | 110 | 4.173  | 2.440 | 7.137   | <0.001 |

|                                             |     |             |       |       |        |
|---------------------------------------------|-----|-------------|-------|-------|--------|
| APACHE II                                   | 252 | 1.088       | 1.050 | 1.127 | <0.001 |
| APACHE II                                   |     |             |       |       |        |
| 0 - 4                                       | 3   | Ref.        |       |       | <0.001 |
| 5 - 9                                       | 22  | 605807962.9 | 0.000 | NA    | 0.999  |
| 10 - 14                                     | 61  | 355407338.2 | 0.000 | NA    | 0.999  |
| 15 - 19                                     | 52  | 930129397.5 | 0.000 | NA    | 0.999  |
| 20 - 24                                     | 58  | 1854819442  | 0.000 | NA    | 0.999  |
| 25 - 29                                     | 28  | 3410474458  | 0.000 | NA    | 0.999  |
| 30 - 34                                     | 19  | 1453939111  | 0.000 | NA    | 0.999  |
| > 34                                        | 9   | 3230975802  | 0.000 | NA    | 0.999  |
| APACHE II                                   |     |             |       |       | <0.001 |
| < 21                                        | 148 | Ref.        |       |       | NA     |
| ≥ 21                                        | 104 | 4.126       | 2.414 | 7.051 | <0.001 |
| <b>Site of Infection</b>                    |     |             |       |       |        |
| Respiratory                                 | 143 | 1.283       | 0.769 | 2.140 | 0.339  |
| Urinary tract                               | 37  | 0.300       | 0.126 | 0.714 | 0.006  |
| Abdominal                                   | 61  | 1.256       | 0.701 | 2.249 | 0.444  |
| Neurological                                | 12  | 0.737       | 0.216 | 2.516 | 0.626  |
| Bones or joints                             | 2   | 0.000       | 0.000 | NA    | 0.999  |
| Skin or cutaneous sites                     | 19  | 2.774       | 1.053 | 7.309 | 0.039  |
| Intravascular catheter                      | 1   | 0.000       | 0.000 | NA    | 1.000  |
| Infective endocarditis                      | 1   | 2439367045  | 0.000 | NA    | >0.999 |
| Primary bacteraemia                         | 7   | 0.590       | 0.112 | 3.101 | 0.533  |
| Systemic                                    | 6   | 0.742       | 0.133 | 4.131 | 0.734  |
| <b>Microbiology</b>                         |     |             |       |       |        |
| Pathogens detection                         |     |             |       |       |        |
| No pathogens detected                       | 67  | 0.546       | 0.300 | 0.994 | 0.048  |
| Gram negative bacteria                      | 156 | 1.475       | 0.871 | 2.498 | 0.148  |
| Gram positive bacteria                      | 34  | 0.791       | 0.372 | 1.679 | 0.541  |
| Fungi                                       | 7   | 1.125       | 0.246 | 5.137 | 0.879  |
| Viruses                                     | 2   | 2464007117  | 0.000 | NA    | 0.999  |
| Other pathogens                             | 4   | 0.493       | 0.051 | 4.810 | 0.543  |
| <b>Completion of sepsis bundle elements</b> |     |             |       |       |        |
| Timing of antibiotics administration        |     |             |       |       |        |
| 0-60 minutes                                | 173 | Ref.        |       |       | 0.367  |
| 61-120 minutes                              | 21  | 1.048       | 0.412 | 2.665 | 0.921  |
| 121-180 minutes                             | 14  | 0.464       | 0.125 | 1.727 | 0.252  |
| >180 minutes                                | 17  | 1.916       | 0.704 | 5.214 | 0.203  |
| Timing of obtaining blood cultures          |     |             |       |       |        |

|                                                                |     |       |       |        |       |
|----------------------------------------------------------------|-----|-------|-------|--------|-------|
| 0-60 minutes                                                   | 135 | Ref.  |       |        | 0.939 |
| 61-120 minutes                                                 | 14  | 1.328 | 0.441 | 3.995  | 0.614 |
| 121-180 minutes                                                | 10  | 0.885 | 0.239 | 3.281  | 0.855 |
| >180 minutes                                                   | 38  | 0.774 | 0.369 | 1.626  | 0.500 |
| Timing of obtaining lactate measurement                        |     |       |       |        |       |
| 0-60 minutes                                                   | 141 | Ref.  |       |        | 0.763 |
| 61-120 minutes                                                 | 10  | 1.012 | 0.273 | 3.748  | 0.986 |
| 121-180 minutes                                                | 6   | 0.304 | 0.035 | 2.668  | 0.282 |
| >180 minutes                                                   | 41  | 0.971 | 0.476 | 1.981  | 0.936 |
| Completion of the sepsis bundle within 1 hour                  | 87  | 0.978 | 0.571 | 1.675  | 0.936 |
| Completion of the administration of antibiotics within 1 hour  | 173 | 0.701 | 0.397 | 1.237  | 0.220 |
| Permutations of the completed elements within 1 hour           |     |       |       |        |       |
| No elements completed                                          | 20  | Ref.  |       |        | 0.228 |
| Antibiotics only                                               | 44  | 0.700 | 0.234 | 2.096  | 0.524 |
| Blood cultures only                                            | 13  | 0.667 | 0.152 | 2.926  | 0.591 |
| Lactate only                                                   | 23  | 1.636 | 0.487 | 5.500  | 0.426 |
| Antibiotics + Lactate                                          | 17  | 0.321 | 0.069 | 1.491  | 0.147 |
| Antibiotics + Blood cultures                                   | 25  | 1.625 | 0.491 | 5.341  | 0.424 |
| Blood cultures + Lactate                                       | 12  | 2.100 | 0.490 | 8.998  | 0.318 |
| Antibiotics + Blood cultures + Lactate                         | 87  | 0.962 | 0.357 | 2.597  | 0.939 |
| Completion of the sepsis bundle within 3 hours                 | 108 | 0.961 | 0.571 | 1.615  | 0.879 |
| Completion of the administration of antibiotics within 3 hours | 205 | 0.403 | 0.196 | 0.830  | 0.014 |
| Permutation of the completed elements of 3-hour sepsis bundle  |     |       |       |        |       |
| No elements completed                                          | 8   | Ref.  |       |        | 0.049 |
| Antibiotics only                                               | 37  | 0.193 | 0.038 | 0.971  | 0.046 |
| Blood cultures only                                            | 5   | 0.900 | 0.091 | 8.899  | 0.928 |
| Lactate only                                                   | 16  | 0.600 | 0.106 | 3.400  | 0.564 |
| Antibiotics + Lactate                                          | 24  | 0.158 | 0.028 | 0.897  | 0.037 |
| Antibiotics + Blood cultures                                   | 36  | 0.600 | 0.124 | 2.894  | 0.525 |
| Blood cultures + Lactate                                       | 7   | 0.500 | 0.170 | 13.225 | 0.715 |
| Antibiotics + Blood cultures + Lactate                         | 108 | 0.382 | 0.087 | 1.682  | 0.203 |
| <b>Life-sustaining treatments during ICU stay</b>              |     |       |       |        |       |



|                                      |     |       |       |        |        |
|--------------------------------------|-----|-------|-------|--------|--------|
| Respiratory support                  |     |       |       |        |        |
| Mechanical ventilation               | 173 | 7.546 | 3.645 | 15.625 | <0.001 |
| Duration of mechanical ventilation   | 167 | 0.998 | 0.969 | 1.028  | 0.909  |
| Non-invasive ventilation             | 20  | 0.785 | 0.302 | 2.041  | 0.619  |
| Duration of non-invasive ventilation | 20  | 4.738 | 1.076 | 20.863 | 0.040  |
| High-flow nasal oxygen               | 38  | 0.408 | 0.184 | 0.904  | 0.027  |
| Duration of high-flow nasal oxygen   | 33  | 1.154 | 0.862 | 1.546  | 0.336  |
| Additional ICU support               |     |       |       |        |        |
| Vasopressors/inotropes               | 163 | 3.408 | 1.899 | 6.116  | <0.001 |
| Renal replacement therapy            | 101 | 3.356 | 1.976 | 5.702  | <0.001 |
| Red blood cell transfusion           | 93  | 1.708 | 1.014 | 2.876  | 0.044  |
| Platelet transfusion                 | 50  | 2.746 | 1.455 | 5.185  | 0.002  |
| Fresh frozen plasma transfusion      | 58  | 1.841 | 1.018 | 3.329  | 0.043  |
| Surgical source control              | 25  | 0.435 | 0.168 | 1.132  | 0.088  |
| Non-surgical source control          | 78  | 0.554 | 0.314 | 0.977  | 0.041  |

Abbreviations: **APACHE II**, Acute Physiology and Chronic Health Examination II; **CI**, confidence interval; **ICU**, intensive care unit; **NA**: not available; **OR**: odds ratio; **qSOFA**, quick Sequential (Sepsis-Related) Organ Failure Assessment; **Ref.**, reference; **SIRS**, systemic inflammatory response syndrome; **SOFA**, Sequential (Sepsis-Related) Organ Failure Assessment.

**Table S16.** Factors associated with hospital mortality in patients with sepsis: multivariable logistic regression analyses (backward elimination)

| Step | Factors                      | Number of patients | Adjusted OR | 95.0% CI for adjusted OR |       | P     |
|------|------------------------------|--------------------|-------------|--------------------------|-------|-------|
|      |                              |                    |             | Lower                    | Upper |       |
| 1    | University affiliation       |                    |             |                          |       |       |
|      | No                           | 153                | Ref.        |                          |       | NA    |
|      | Yes                          | 99                 | 2.062       | 0.922                    | 4.612 | 0.078 |
|      | Training program in ICU      |                    |             |                          |       |       |
|      | No                           | 50                 | Ref.        |                          |       | NA    |
|      | Yes                          | 202                | 0.308       | 0.103                    | 0.923 | 0.035 |
|      | Cardiovascular disease       | 78                 | 2.307       | 1.005                    | 5.295 | 0.049 |
|      | Chronic neurological disease | 36                 | 0.239       | 0.070                    | 0.821 | 0.023 |
|      | SOFA                         |                    |             |                          |       |       |
|      | < 8                          | 140                | Ref.        |                          |       | NA    |
|      | ≥ 8                          | 110                | 2.042       | 0.888                    | 4.695 | 0.093 |
|      | APACHE II                    |                    |             |                          |       |       |
|      | < 21                         | 148                | Ref.        |                          |       | NA    |

|   |                                                                |     |       |       |        |       |
|---|----------------------------------------------------------------|-----|-------|-------|--------|-------|
|   | ≥ 21                                                           | 104 | 2.463 | 1.134 | 5.348  | 0.023 |
|   | Urinary Tract                                                  | 37  | 0.231 | 0.065 | 0.821  | 0.024 |
|   | Abdominal                                                      | 61  | 0.968 | 0.382 | 2.452  | 0.945 |
|   | Skin or Cutaneous Sites                                        | 19  | 2.817 | 0.810 | 9.792  | 0.103 |
|   | Pathogens detection                                            |     |       |       |        |       |
|   | No pathogens detected                                          | 67  | 1.248 | 0.340 | 4.584  | 0.738 |
|   | Gram-negative bacteria                                         | 156 | 1.980 | 0.611 | 6.414  | 0.254 |
|   | Completion of the sepsis bundle within 1 hour                  | 87  | 1.533 | 0.411 | 5.724  | 0.525 |
|   | Completion of the administration of antibiotics within 1 hour  | 173 | 2.106 | 0.409 | 10.828 | 0.373 |
|   | Completion of the sepsis bundle within 3 hours                 | 108 | 0.808 | 0.214 | 3.053  | 0.754 |
|   | Completion of the administration of antibiotics within 3 hours | 205 | 0.212 | 0.038 | 1.179  | 0.076 |
|   | Respiratory support                                            |     |       |       |        |       |
|   | Mechanical ventilation                                         | 173 | 3.789 | 1.408 | 10.196 | 0.008 |
|   | High-flow nasal oxygen                                         | 38  | 0.931 | 0.305 | 2.837  | 0.899 |
|   | Additional ICU support                                         |     |       |       |        |       |
|   | Vasopressors/inotropes                                         | 163 | 0.987 | 0.387 | 2.516  | 0.979 |
|   | Renal replacement therapy                                      | 101 | 1.513 | 0.665 | 3.442  | 0.323 |
|   | Red blood cell transfusion                                     | 93  | 1.022 | 0.456 | 2.291  | 0.959 |
|   | Platelet transfusion                                           | 50  | 0.905 | 0.358 | 2.289  | 0.834 |
|   | Fresh frozen plasma transfusion                                | 58  | 1.625 | 0.668 | 3.952  | 0.285 |
|   | Surgical source control                                        | 25  | 0.369 | 0.108 | 1.260  | 0.112 |
|   | Non-surgical source control                                    | 78  | 0.454 | 0.206 | 0.998  | 0.049 |
|   | Constant                                                       |     | 0.147 |       |        | 0.018 |
| 2 | University affiliation                                         |     |       |       |        |       |
|   | No                                                             | 153 | Ref.  |       |        | NA    |
|   | Yes                                                            | 99  | 2.064 | 0.924 | 4.607  | 0.077 |
|   | Training program in ICU                                        |     |       |       |        |       |
|   | No                                                             | 50  | Ref.  |       |        | NA    |
|   | Yes                                                            | 202 | 0.307 | 0.104 | 0.905  | 0.032 |
|   | Cardiovascular disease                                         | 78  | 2.308 | 1.007 | 5.292  | 0.048 |
|   | Chronic neurological disease                                   | 36  | 0.24  | 0.071 | 0.813  | 0.022 |
|   | SOFA                                                           |     |       |       |        |       |

|   |                                                                |     |       |       |        |       |
|---|----------------------------------------------------------------|-----|-------|-------|--------|-------|
|   | < 8                                                            | 140 | Ref.  |       |        | NA    |
|   | ≥ 8                                                            | 110 | 2.035 | 0.916 | 4.521  | 0.081 |
|   | APACHE II                                                      |     |       |       |        |       |
|   | < 21                                                           | 148 | Ref.  |       |        | NA    |
|   | ≥ 21                                                           | 104 | 2.459 | 1.142 | 5.295  | 0.022 |
|   | Urinary Tract                                                  | 37  | 0.231 | 0.065 | 0.820  | 0.023 |
|   | Abdominal                                                      | 61  | 0.968 | 0.382 | 2.452  | 0.946 |
|   | Skin or Cutaneous Sites                                        | 19  | 2.816 | 0.810 | 9.787  | 0.103 |
|   | Pathogens detection                                            |     |       |       |        |       |
|   | No pathogens detected                                          | 67  | 1.246 | 0.342 | 4.538  | 0.739 |
|   | Gram-negative bacteria                                         | 156 | 1.977 | 0.615 | 6.352  | 0.253 |
|   | Completion of the sepsis bundle within 1 hour                  | 87  | 1.533 | 0.411 | 5.723  | 0.525 |
|   | Completion of the administration of antibiotics within 1 hour  | 173 | 2.107 | 0.410 | 10.831 | 0.372 |
|   | Completion of the sepsis bundle within 3 hours                 | 108 | 0.808 | 0.214 | 3.049  | 0.753 |
|   | Completion of the administration of antibiotics within 3 hours | 205 | 0.212 | 0.038 | 1.178  | 0.076 |
|   | Respiratory support                                            |     |       |       |        |       |
|   | Mechanical ventilation                                         | 173 | 3.775 | 1.461 | 9.753  | 0.006 |
|   | High-flow nasal oxygen                                         | 38  | 0.930 | 0.305 | 2.832  | 0.898 |
|   | Additional ICU support                                         |     |       |       |        |       |
|   | Renal replacement therapy                                      | 101 | 1.511 | 0.670 | 3.406  | 0.320 |
|   | Red blood cell transfusion                                     | 93  | 1.020 | 0.459 | 2.269  | 0.961 |
|   | Platelet transfusion                                           | 50  | 0.906 | 0.359 | 2.286  | 0.835 |
|   | Fresh frozen plasma transfusion                                | 58  | 1.626 | 0.669 | 3.952  | 0.284 |
|   | Surgical source control                                        | 25  | 0.369 | 0.108 | 1.257  | 0.111 |
|   | Non-surgical source control                                    | 78  | 0.454 | 0.206 | 0.998  | 0.049 |
|   | Constant                                                       |     | 0.147 |       |        | 0.018 |
| 3 | University affiliation                                         |     |       |       |        |       |
|   | No                                                             | 153 | Ref.  |       |        | NA    |
|   | Yes                                                            | 99  | 2.062 | 0.924 | 4.602  | 0.077 |
|   | Training program in ICU                                        |     |       |       |        |       |
|   | No                                                             | 50  | Ref.  |       |        | NA    |
|   | Yes                                                            | 202 | 0.308 | 0.105 | 0.904  | 0.032 |

|   |                                                                |     |       |       |        |       |
|---|----------------------------------------------------------------|-----|-------|-------|--------|-------|
|   | Cardiovascular disease                                         | 78  | 2.306 | 1.007 | 5.282  | 0.048 |
|   | Chronic neurological disease                                   | 36  | 0.241 | 0.071 | 0.812  | 0.022 |
|   | SOFA                                                           |     |       |       |        |       |
|   | < 8                                                            | 140 | Ref.  |       |        | NA    |
|   | ≥ 8                                                            | 110 | 2.033 | 0.916 | 4.514  | 0.081 |
|   | APACHE II                                                      |     |       |       |        |       |
|   | < 21                                                           | 148 | Ref.  |       |        | NA    |
|   | ≥ 21                                                           | 104 | 2.457 | 1.142 | 5.283  | 0.022 |
|   | Urinary Tract                                                  | 37  | 0.230 | 0.065 | 0.819  | 0.023 |
|   | Abdominal                                                      | 61  | 0.969 | 0.383 | 2.453  | 0.947 |
|   | Skin or Cutaneous Sites                                        | 19  | 2.814 | 0.810 | 9.776  | 0.104 |
|   | Pathogens detection                                            |     |       |       |        |       |
|   | No pathogens detected                                          | 67  | 1.240 | 0.345 | 4.461  | 0.742 |
|   | Gram-negative bacteria                                         | 156 | 1.975 | 0.615 | 6.346  | 0.253 |
|   | Completion of the sepsis bundle within 1 hour                  | 87  | 1.534 | 0.411 | 5.727  | 0.524 |
|   | Completion of the administration of antibiotics within 1 hour  | 173 | 2.106 | 0.410 | 10.830 | 0.373 |
|   | Completion of the sepsis bundle within 3 hours                 | 108 | 0.807 | 0.214 | 3.042  | 0.751 |
|   | Completion of the administration of antibiotics within 3 hours | 205 | 0.212 | 0.038 | 1.179  | 0.076 |
|   | Respiratory support                                            |     |       |       |        |       |
|   | Mechanical ventilation                                         | 173 | 3.782 | 1.469 | 9.739  | 0.006 |
|   | High-flow nasal oxygen                                         | 38  | 0.929 | 0.305 | 2.822  | 0.896 |
|   | Additional ICU support                                         |     |       |       |        |       |
|   | Renal replacement therapy                                      | 101 | 1.518 | 0.688 | 3.349  | 0.301 |
|   | Platelet transfusion                                           | 50  | 0.911 | 0.372 | 2.233  | 0.839 |
|   | Fresh frozen plasma transfusion                                | 58  | 1.631 | 0.677 | 3.927  | 0.275 |
|   | Surgical source control                                        | 25  | 0.370 | 0.109 | 1.254  | 0.110 |
|   | Non-surgical source control                                    | 78  | 4.454 | 0.207 | 0.998  | 0.049 |
|   | Constant                                                       |     | 0.147 |       |        | 0.017 |
| 4 | University affiliation                                         |     |       |       |        |       |
|   | No                                                             | 153 | Ref.  |       |        | NA    |
|   | Yes                                                            | 99  | 2.056 | 0.926 | 4.564  | 0.077 |
|   | Training program in ICU                                        |     |       |       |        |       |
|   | No                                                             | 50  | Ref.  |       |        | NA    |

|   |                                                                |     |       |       |        |       |
|---|----------------------------------------------------------------|-----|-------|-------|--------|-------|
|   | Yes                                                            | 202 | 0.307 | 0.105 | 0.900  | 0.031 |
|   | Cardiovascular disease                                         | 78  | 2.316 | 1.021 | 5.254  | 0.045 |
|   | Chronic neurological disease                                   | 36  | 0.241 | 0.071 | 0.813  | 0.022 |
|   | SOFA                                                           |     |       |       |        |       |
|   | < 8                                                            | 140 | Ref.  |       |        | NA    |
|   | ≥ 8                                                            | 110 | 2.026 | 0.920 | 4.461  | 0.080 |
|   | APACHE II                                                      |     |       |       |        |       |
|   | < 21                                                           | 148 | Ref.  |       |        | NA    |
|   | ≥ 21                                                           | 104 | 2.459 | 1.143 | 5.290  | 0.021 |
|   | Urinary Tract                                                  | 37  | 0.233 | 0.068 | 0.794  | 0.020 |
|   | Skin or Cutaneous Sites                                        | 19  | 2.831 | 0.826 | 9.710  | 0.098 |
|   | Pathogens detection                                            |     |       |       |        |       |
|   | No pathogens detected                                          | 67  | 1.232 | 0.348 | 4.361  | 0.747 |
|   | Gram-negative bacteria                                         | 156 | 1.976 | 0.615 | 6.343  | 0.253 |
|   | Completion of the sepsis bundle within 1 hour                  | 87  | 1.540 | 0.414 | 5.727  | 0.519 |
|   | Completion of the administration of antibiotics within 1 hour  | 173 | 2.097 | 0.410 | 10.738 | 0.374 |
|   | Completion of the sepsis bundle within 3 hours                 | 108 | 0.802 | 0.215 | 2.989  | 0.742 |
|   | Completion of the administration of antibiotics within 3 hours | 205 | 0.213 | 0.038 | 1.181  | 0.077 |
|   | Respiratory support                                            |     |       |       |        |       |
|   | Mechanical ventilation                                         | 173 | 3.785 | 1.471 | 9.741  | 0.006 |
|   | High-flow nasal oxygen                                         | 38  | 0.930 | 0.306 | 2.824  | 0.899 |
|   | Additional ICU support                                         |     |       |       |        |       |
|   | Renal replacement therapy                                      | 101 | 1.509 | 0.697 | 3.268  | 0.297 |
|   | Platelet transfusion                                           | 50  | 0.915 | 0.376 | 2.227  | 0.844 |
|   | Fresh frozen plasma transfusion                                | 58  | 1.626 | 0.678 | 3.897  | 0.276 |
|   | Surgical source control                                        | 25  | 0.366 | 0.113 | 1.180  | 0.092 |
|   | Non-surgical source control                                    | 78  | 0.454 | 0.207 | 0.998  | 0.050 |
|   | Constant                                                       |     | 0.147 |       |        | 0.017 |
| 5 | University affiliation                                         |     |       |       |        |       |
|   | No                                                             | 153 | Ref.  |       |        | NA    |
|   | Yes                                                            | 99  | 2.062 | 0.930 | 4.572  | 0.075 |
|   | Training program in ICU                                        |     |       |       |        |       |
|   | No                                                             | 50  | Ref.  |       |        | NA    |

|   |                                                                |     |       |       |        |       |
|---|----------------------------------------------------------------|-----|-------|-------|--------|-------|
|   | Yes                                                            | 202 | 0.302 | 0.106 | 0.858  | 0.025 |
|   | Cardiovascular disease                                         | 78  | 2.311 | 1.019 | 5.240  | 0.045 |
|   | Chronic neurological disease                                   | 36  | 0.242 | 0.072 | 0.814  | 0.022 |
|   | SOFA                                                           |     |       |       |        |       |
|   | < 8                                                            | 140 | Ref.  |       |        | NA    |
|   | ≥ 8                                                            | 110 | 2.016 | 0.919 | 4.425  | 0.080 |
|   | APACHE II                                                      |     |       |       |        |       |
|   | < 21                                                           | 148 | Ref.  |       |        | NA    |
|   | ≥ 21                                                           | 104 | 2.465 | 1.147 | 5.297  | 0.021 |
|   | Urinary Tract                                                  | 37  | 0.233 | 0.068 | 0.794  | 0.020 |
|   | Skin or Cutaneous Sites                                        | 19  | 2.839 | 0.829 | 9.727  | 0.097 |
|   | Pathogens detection                                            |     |       |       |        |       |
|   | No pathogens detected                                          | 67  | 1.225 | 0.347 | 4.325  | 0.753 |
|   | Gram-negative bacteria                                         | 156 | 1.962 | 0.614 | 6.268  | 0.255 |
|   | Completion of the sepsis bundle within 1 hour                  | 87  | 1.525 | 0.414 | 5.622  | 0.526 |
|   | Completion of the administration of antibiotics within 1 hour  | 173 | 2.123 | 0.418 | 10.771 | 0.364 |
|   | Completion of the sepsis bundle within 3 hours                 | 108 | 0.811 | 0.220 | 2.992  | 0.783 |
|   | Completion of the administration of antibiotics within 3 hours | 205 | 0.212 | 0.038 | 1.178  | 0.076 |
|   | Respiratory support                                            |     |       |       |        |       |
|   | Mechanical ventilation                                         | 173 | 3.838 | 1.525 | 9.658  | 0.004 |
|   | Additional ICU support                                         |     |       |       |        |       |
|   | Renal replacement therapy                                      | 101 | 1.519 | 0.705 | 3.269  | 0.286 |
|   | Platelet transfusion                                           | 50  | 0.914 | 0.376 | 2.226  | 0.844 |
|   | Fresh frozen plasma transfusion                                | 58  | 1.638 | 0.689 | 3.897  | 0.264 |
|   | Surgical source control                                        | 25  | 0.369 | 0.116 | 1.180  | 0.093 |
|   | Non-surgical source control                                    | 78  | 0.456 | 0.208 | 1.000  | 0.050 |
|   | Constant                                                       |     | 0.146 |       |        | 0.016 |
| 6 | University affiliation                                         |     |       |       |        |       |
|   | No                                                             | 153 | Ref.  |       |        | NA    |
|   | Yes                                                            | 99  | 2.036 | 0.927 | 4.473  | 0.077 |
|   | Training program in ICU                                        |     |       |       |        |       |
|   | No                                                             | 50  | Ref.  |       |        | NA    |
|   | Yes                                                            | 202 | 0.305 | 0.108 | 0.862  | 0.025 |

|   |                                                                |     |       |       |        |       |
|---|----------------------------------------------------------------|-----|-------|-------|--------|-------|
|   | Cardiovascular disease                                         | 78  | 2.311 | 1.020 | 5.232  | 0.045 |
|   | Chronic neurological disease                                   | 36  | 0.244 | 0.073 | 0.818  | 0.022 |
|   | SOFA                                                           |     |       |       |        |       |
|   | < 8                                                            | 140 | Ref.  |       |        | NA    |
|   | ≥ 8                                                            | 110 | 1.999 | 0.915 | 4.368  | 0.082 |
|   | APACHE II                                                      |     |       |       |        |       |
|   | < 21                                                           | 148 | Ref.  |       |        | NA    |
|   | ≥ 21                                                           | 104 | 2.457 | 1.145 | 5.272  | 0.021 |
|   | Urinary Tract                                                  | 37  | 2.457 | 1.145 | 5.272  | 0.021 |
|   | Skin or Cutaneous Sites                                        | 19  | 0.231 | 0.068 | 0.786  | 0.019 |
|   | Pathogens detection                                            |     |       |       |        |       |
|   | No pathogens detected                                          | 67  | 1.236 | 0.351 | 4.357  | 0.741 |
|   | Gram-negative bacteria                                         | 156 | 1.966 | 0.615 | 6.283  | 0.254 |
|   | Completion of the sepsis bundle within 1 hour                  | 87  | 1.523 | 0.413 | 5.613  | 0.527 |
|   | Completion of the administration of antibiotics within 1 hour  | 173 | 2.107 | 0.416 | 10.676 | 0.368 |
|   | Completion of the sepsis bundle within 3 hours                 | 108 | 0.810 | 0.220 | 2.987  | 0.752 |
|   | Completion of the administration of antibiotics within 3 hours | 205 | 0.215 | 0.039 | 1.187  | 0.078 |
|   | Respiratory support                                            |     |       |       |        |       |
|   | Mechanical ventilation                                         | 173 | 3.822 | 1.520 | 9.610  | 0.004 |
|   | Additional ICU support                                         |     |       |       |        |       |
|   | Renal replacement therapy                                      | 101 | 1.507 | 0.702 | 3.235  | 0.293 |
|   | Fresh frozen plasma transfusion                                | 58  | 1.596 | 0.698 | 3.649  | 0.268 |
|   | Surgical source control                                        | 25  | 0.367 | 0.115 | 1.171  | 0.090 |
|   | Non-surgical source control                                    | 78  | 0.460 | 0.211 | 1.003  | 0.051 |
|   | Constant                                                       |     | 0.145 |       |        | 0.016 |
| 7 | University affiliation                                         |     |       |       |        |       |
|   | No                                                             | 153 | Ref.  |       |        | NA    |
|   | Yes                                                            | 99  | 2.024 | 0.923 | 4.435  | 0.078 |
|   | Training program in ICU                                        |     |       |       |        |       |
|   | No                                                             | 50  | Ref.  |       |        | NA    |
|   | Yes                                                            | 202 | 0.302 | 0.107 | 0.853  | 0.024 |
|   | Cardiovascular disease                                         | 78  | 2.310 | 1.020 | 5.230  | 0.045 |
|   | Chronic neurological disease                                   | 36  | 0.246 | 0.074 | 0.826  | 0.023 |

|   |                                                                |     |       |       |        |       |
|---|----------------------------------------------------------------|-----|-------|-------|--------|-------|
|   | SOFA                                                           |     |       |       |        |       |
|   | < 8                                                            | 140 | Ref.  |       |        | NA    |
|   | ≥ 8                                                            | 110 | 1.952 | 0.907 | 4.201  | 0.087 |
|   | APACHE II                                                      |     |       |       |        |       |
|   | < 21                                                           | 148 | Ref.  |       |        | NA    |
|   | ≥ 21                                                           | 104 | 2.504 | 1.176 | 5.329  | 0.017 |
|   | Urinary Tract                                                  | 37  | 0.233 | 0.069 | 0.789  | 0.019 |
|   | Skin or Cutaneous Sites                                        | 19  | 2.892 | 0.845 | 9.897  | 0.091 |
|   | Pathogens detection                                            |     |       |       |        |       |
|   | No pathogens detected                                          | 67  | 1.249 | 0.355 | 4.398  | 0.729 |
|   | Gram-negative bacteria                                         | 156 | 1.967 | 0.614 | 6.299  | 0.255 |
|   | Completion of the sepsis bundle within 1 hour                  | 87  | 1.284 | 0.600 | 2.751  | 0.520 |
|   | Completion of the administration of antibiotics within 1 hour  | 173 | 2.172 | 0.433 | 10.903 | 0.346 |
|   | Completion of the administration of antibiotics within 3 hours | 205 | 0.215 | 0.039 | 1.195  | 0.079 |
|   | Respiratory support                                            |     |       |       |        |       |
|   | Mechanical ventilation                                         | 173 | 3.840 | 1.528 | 9.649  | 0.004 |
|   | Additional ICU support                                         |     |       |       |        |       |
|   | Renal replacement therapy                                      | 101 | 1.513 | 0.705 | 3.248  | 0.288 |
|   | Fresh frozen plasma transfusion                                | 58  | 1.614 | 0.710 | 3.671  | 0.253 |
|   | Surgical source control                                        | 25  | 0.375 | 0.119 | 1.186  | 0.095 |
|   | Non-surgical source control                                    | 78  | 0.461 | 0.211 | 1.005  | 0.052 |
|   | Constant                                                       |     | 0.139 |       |        | 0.013 |
| 8 | University affiliation                                         |     |       |       |        |       |
|   | No                                                             | 153 | Ref.  |       |        | NA    |
|   | Yes                                                            | 99  | 2.038 | 0.931 | 4.460  | 0.075 |
|   | Training program in ICU                                        |     |       |       |        |       |
|   | No                                                             | 50  | Ref.  |       |        | NA    |
|   | Yes                                                            | 202 | 0.306 | 0.109 | 0.862  | 0.025 |
|   | Cardiovascular disease                                         | 78  | 2.249 | 1.010 | 5.010  | 0.047 |
|   | Chronic neurological disease                                   | 36  | 0.250 | 0.075 | 0.836  | 0.024 |
|   | SOFA                                                           |     |       |       |        |       |
|   | < 8                                                            | 140 | Ref.  |       |        | NA    |
|   | ≥ 8                                                            | 110 | 1.945 | 0.905 | 4.178  | 0.088 |
|   | APACHE II                                                      |     |       |       |        |       |



|   |                                                                |     |       |       |        |       |
|---|----------------------------------------------------------------|-----|-------|-------|--------|-------|
|   | < 21                                                           | 148 | Ref.  |       |        | NA    |
|   | ≥ 21                                                           | 104 | 2.504 | 1.177 | 5.329  | 0.017 |
|   | Urinary Tract                                                  | 37  | 0.237 | 0.071 | 0.798  | 0.020 |
|   | Skin or Cutaneous Sites                                        | 19  | 2.731 | 0.833 | 8.952  | 0.097 |
|   | Pathogens detection                                            |     |       |       |        |       |
|   | Gram-negative bacteria                                         | 156 | 1.684 | 0.789 | 3.593  | 0.178 |
|   | Completion of the sepsis bundle within 1 hour                  | 87  | 1.267 | 0.594 | 2.704  | 0.540 |
|   | Completion of the administration of antibiotics within 1 hour  | 173 | 2.200 | 0.436 | 11.099 | 0.340 |
|   | Completion of the administration of antibiotics within 3 hours | 205 | 0.213 | 0.038 | 1.188  | 0.078 |
|   | Respiratory support                                            |     |       |       |        |       |
|   | Mechanical ventilation                                         | 173 | 3.815 | 1.519 | 9.584  | 0.004 |
|   | Additional ICU support                                         |     |       |       |        |       |
|   | Renal replacement therapy                                      | 101 | 1.511 | 0.704 | 3.241  | 0.290 |
|   | Fresh frozen plasma transfusion                                | 58  | 1.604 | 0.706 | 3.644  | 0.259 |
|   | Surgical source control                                        | 25  | 0.380 | 0.121 | 1.196  | 0.098 |
|   | Non-surgical source control                                    | 78  | 0.461 | 0.212 | 1.006  | 0.052 |
|   | Constant                                                       |     | 0.163 |       |        | 0.005 |
| 9 | University affiliation                                         |     |       |       |        |       |
|   | No                                                             | 153 | Ref.  |       |        | NA    |
|   | Yes                                                            | 99  | 2.074 | 0.949 | 4.532  | 0.067 |
|   | Training program in ICU                                        |     |       |       |        |       |
|   | No                                                             | 50  | Ref.  |       |        | NA    |
|   | Yes                                                            | 202 | 0.309 | 0.110 | 0.870  | 0.026 |
|   | Cardiovascular disease                                         | 78  | 2.215 | 0.997 | 4.920  | 0.051 |
|   | Chronic neurological disease                                   | 36  | 0.252 | 0.076 | 0.842  | 0.025 |
|   | SOFA                                                           |     |       |       |        |       |
|   | < 8                                                            | 140 | Ref.  |       |        | NA    |
|   | ≥ 8                                                            | 110 | 1.968 | 0.916 | 4.228  | 0.083 |
|   | APACHE II                                                      |     |       |       |        |       |
|   | < 21                                                           | 148 | Ref.  |       |        | NA    |
|   | ≥ 21                                                           | 104 | 2.487 | 1.170 | 5.283  | 0.018 |
|   | Urinary Tract                                                  | 37  | 0.248 | 0.074 | 0.830  | 0.024 |
|   | Skin or Cutaneous Sites                                        | 19  | 2.715 | 0.831 | 8.875  | 0.098 |
|   | Pathogens detection                                            |     |       |       |        |       |

|    |                                                                |     |       |       |       |       |
|----|----------------------------------------------------------------|-----|-------|-------|-------|-------|
|    | Gram-negative bacteria                                         | 156 | 1.669 | 0.782 | 3.561 | 0.186 |
|    | Completion of the administration of antibiotics within 1 hour  | 173 | 1.988 | 0.411 | 9.618 | 0.393 |
|    | Completion of the administration of antibiotics within 3 hours | 205 | 0.214 | 0.039 | 1.180 | 0.077 |
|    | Respiratory support                                            |     |       |       |       |       |
|    | Mechanical ventilation                                         | 173 | 3.742 | 1.496 | 9.363 | 0.005 |
|    | Additional ICU support                                         |     |       |       |       |       |
|    | Renal replacement therapy                                      | 101 | 1.486 | 0.695 | 3.174 | 0.307 |
|    | Fresh frozen plasma transfusion                                | 58  | 1.558 | 0.691 | 3.513 | 0.285 |
|    | Surgical source control                                        | 25  | 0.374 | 0.119 | 1.176 | 0.092 |
|    | Non-surgical source control                                    | 78  | 0.466 | 0.214 | 1.013 | 0.054 |
|    | Constant                                                       |     | 0.182 |       |       | 0.005 |
| 10 | University affiliation                                         |     |       |       |       |       |
|    | No                                                             | 153 | Ref.  |       |       | NA    |
|    | Yes                                                            | 99  | 2.024 | .931  | 4.396 | 0.075 |
|    | Training program in ICU                                        |     |       |       |       |       |
|    | No                                                             | 50  | Ref.  |       |       | NA    |
|    | Yes                                                            | 202 | 0.324 | 0.116 | 0.903 | 0.031 |
|    | Cardiovascular disease                                         | 78  | 2.168 | 0.980 | 4.793 | 0.056 |
|    | Chronic neurological disease                                   | 36  | 0.249 | 0.075 | 0.829 | 0.023 |
|    | SOFA                                                           |     |       |       |       |       |
|    | < 8                                                            | 140 | Ref.  |       |       | NA    |
|    | ≥ 8                                                            | 110 | 2.023 | 0.946 | 4.326 | 0.069 |
|    | APACHE II                                                      |     |       |       |       |       |
|    | < 21                                                           | 148 | Ref.  |       |       | NA    |
|    | ≥ 21                                                           | 104 | 2.529 | 1.194 | 5.355 | 0.015 |
|    | Urinary Tract                                                  | 37  | 0.264 | 0.080 | 0.871 | 0.029 |
|    | Skin or Cutaneous Sites                                        | 19  | 2.731 | 0.841 | 8.868 | 0.095 |
|    | Pathogens detection                                            |     |       |       |       |       |
|    | Gram-negative bacteria                                         | 156 | 1.589 | 0.752 | 3.360 | 0.225 |
|    | Completion of the administration of antibiotics within 3 hours | 205 | 0.387 | 0.143 | 1.050 | 0.062 |
|    | Respiratory support                                            |     |       |       |       |       |
|    | Mechanical ventilation                                         | 173 | 3.878 | 1.558 | 9.657 | 0.004 |
|    | Additional ICU support                                         |     |       |       |       |       |

|    |                                                                |     |       |       |        |       |
|----|----------------------------------------------------------------|-----|-------|-------|--------|-------|
|    | Renal replacement therapy                                      | 101 | 1.434 | 0.676 | 3.041  | 0.348 |
|    | Fresh frozen plasma transfusion                                | 58  | 1.534 | 0.682 | 3.451  | 0.301 |
|    | Surgical source control                                        | 25  | 0.392 | 0.126 | 1.220  | 0.106 |
|    | Non-surgical source control                                    | 78  | 0.462 | 0.212 | 1.006  | 0.052 |
|    | Constant                                                       |     | 0.184 |       |        | 0.006 |
| 11 | University affiliation                                         |     |       |       |        |       |
|    | No                                                             | 153 | Ref.  |       |        | NA    |
|    | Yes                                                            | 99  | 2.059 | 0.949 | 4.464  | 0.067 |
|    | Training program in ICU                                        |     |       |       |        |       |
|    | No                                                             | 50  | Ref.  |       |        | NA    |
|    | Yes                                                            | 202 | 0.320 | 0.115 | 0.887  | 0.028 |
|    | Cardiovascular disease                                         | 78  | 2.212 | 1.002 | 4.881  | 0.049 |
|    | Chronic neurological disease                                   | 36  | 0.234 | 0.070 | 0.779  | 0.018 |
|    | SOFA                                                           |     |       |       |        |       |
|    | < 8                                                            | 140 | Ref.  |       |        | NA    |
|    | ≥ 8                                                            | 110 | 2.239 | 1.080 | 4.641  | 0.030 |
|    | APACHE II                                                      |     |       |       |        |       |
|    | < 21                                                           | 148 | Ref.  |       |        | NA    |
|    | ≥ 21                                                           | 104 | 2.608 | 1.234 | 5.510  | 0.012 |
|    | Urinary Tract                                                  | 37  | 0.275 | 0.084 | 0.900  | 0.033 |
|    | Skin or Cutaneous Sites                                        | 19  | 2.766 | 0.865 | 8.848  | 0.086 |
|    | Pathogens detection                                            |     |       |       |        |       |
|    | Gram-negative bacteria                                         | 156 | 1.646 | 0.783 | 3.461  | 0.188 |
|    | Completion of the administration of antibiotics within 3 hours | 205 | 0.401 | 0.149 | 1.077  | 0.070 |
|    | Respiratory support                                            |     |       |       |        |       |
|    | Mechanical ventilation                                         | 173 | 4.050 | 1.637 | 10.023 | 0.002 |
|    | Additional ICU support                                         |     |       |       |        |       |
|    | Fresh frozen plasma transfusion                                | 58  | 1.666 | 0.758 | 3.659  | 0.204 |
|    | Surgical source control                                        | 25  | 0.370 | 0.120 | 1.142  | 0.084 |
|    | Non-surgical source control                                    | 78  | 0.480 | 0.223 | 1.033  | 0.060 |
|    | Constant                                                       |     | 0.184 |       |        | 0.006 |
| 12 | University affiliation                                         |     |       |       |        |       |
|    | No                                                             | 153 | Ref.  |       |        | NA    |
|    | Yes                                                            | 99  | 1.963 | 0.913 | 4.223  | 0.084 |
|    | Training program in ICU                                        |     |       |       |        |       |

|    |                                                                |     |       |       |        |       |
|----|----------------------------------------------------------------|-----|-------|-------|--------|-------|
|    | No                                                             | 50  | Ref.  |       |        | NA    |
|    | Yes                                                            | 202 | 0.357 | 0.133 | 0.961  | 0.042 |
|    | Cardiovascular disease                                         | 78  | 2.208 | 1.005 | 4.852  | 0.049 |
|    | Chronic neurological disease                                   | 36  | 0.224 | 0.068 | 0.737  | 0.014 |
|    | SOFA                                                           |     |       |       |        |       |
|    | < 8                                                            | 140 | Ref.  |       |        | NA    |
|    | ≥ 8                                                            | 110 | 2.430 | 1.184 | 4.989  | 0.016 |
|    | APACHE II                                                      |     |       |       |        |       |
|    | < 21                                                           | 148 | Ref.  |       |        | NA    |
|    | ≥ 21                                                           | 104 | 2.584 | 1.224 | 5.452  | 0.013 |
|    | Urinary Tract                                                  | 37  | 0.307 | 0.097 | 0.967  | 0.044 |
|    | Skin or Cutaneous Sites                                        | 19  | 2.803 | 0.878 | 8.950  | 0.082 |
|    | Pathogens detection                                            |     |       |       |        |       |
|    | Gram-negative bacteria                                         | 156 | 1.728 | 0.828 | 3.606  | 0.145 |
|    | Completion of the administration of antibiotics within 3 hours | 205 | 0.393 | 0.147 | 1.050  | 0.063 |
|    | Respiratory support                                            |     |       |       |        |       |
|    | Mechanical ventilation                                         | 173 | 4.138 | 1.678 | 10.200 | 0.002 |
|    | Additional ICU support                                         |     |       |       |        |       |
|    | Surgical source control                                        | 25  | 0.371 | 0.118 | 1.167  | 0.090 |
|    | Non-surgical source control                                    | 78  | 0.507 | 0.236 | 1.086  | 0.080 |
|    | Constant                                                       |     | 0.177 |       |        | 0.004 |
| 13 | University affiliation                                         |     |       |       |        |       |
|    | No                                                             | 153 | Ref.  |       |        | NA    |
|    | Yes                                                            | 99  | 1.966 | 0.917 | 4.213  | 0.082 |
|    | Training program in ICU                                        |     |       |       |        |       |
|    | No                                                             | 50  | Ref.  |       |        | NA    |
|    | Yes                                                            | 202 | 0.379 | 0.143 | 1.009  | 0.052 |
|    | Cardiovascular disease                                         | 78  | 2.308 | 1.060 | 5.027  | 0.035 |
|    | Chronic neurological disease                                   | 36  | 0.226 | 0.070 | .731   | 0.013 |
|    | SOFA                                                           |     |       |       |        |       |
|    | < 8                                                            | 140 | Ref.  |       |        | NA    |
|    | ≥ 8                                                            | 110 | 2.403 | 1.176 | 4.908  | 0.016 |
|    | APACHE II                                                      |     |       |       |        |       |
|    | < 21                                                           | 148 | Ref.  |       |        | NA    |
|    | ≥ 21                                                           | 104 | 2.341 | 1.129 | 4.856  | 0.022 |
|    | Urinary Tract                                                  | 37  | 0.315 | 0.101 | .986   | 0.047 |
|    | Skin or Cutaneous Sites                                        | 19  | 2.465 | 0.787 | 7.716  | 0.121 |
|    | Completion of the administration of antibiotics                | 205 | 0.359 | 0.135 | 0.957  | 0.041 |

|    |                                                                |     |       |       |        |       |
|----|----------------------------------------------------------------|-----|-------|-------|--------|-------|
|    | within 3 hours                                                 |     |       |       |        |       |
|    | Respiratory support                                            |     |       |       |        |       |
|    | Mechanical ventilation                                         | 173 | 4.556 | 1.860 | 11.160 | 0.001 |
|    | Additional ICU support                                         |     |       |       |        |       |
|    | Surgical source control                                        | 25  | 0.382 | 0.122 | 1.194  | 0.098 |
|    | Non-surgical source control                                    | 78  | 0.564 | 0.267 | 1.191  | 0.133 |
|    | Constant                                                       |     | 0.226 |       |        | 0.010 |
| 14 | University affiliation                                         |     |       |       |        |       |
|    | No                                                             | 153 | Ref.  |       |        | NA    |
|    | Yes                                                            | 99  | 1.967 | 0.921 | 4.200  | 0.080 |
|    | Training program in ICU                                        |     |       |       |        |       |
|    | No                                                             | 50  | Ref.  |       |        | NA    |
|    | Yes                                                            | 202 | 0.338 | 0.131 | 0.870  | 0.025 |
|    | Cardiovascular disease                                         | 78  | 2.177 | 1.005 | 4.719  | 0.049 |
|    | Chronic neurological disease                                   | 36  | 0.206 | 0.066 | 0.645  | 0.007 |
|    | SOFA                                                           |     |       |       |        |       |
|    | < 8                                                            | 140 | Ref.  |       |        | NA    |
|    | ≥ 8                                                            | 110 | 2.359 | 1.160 | 4.797  | 0.018 |
|    | APACHE II                                                      |     |       |       |        |       |
|    | < 21                                                           | 148 | Ref.  |       |        | NA    |
|    | ≥ 21                                                           | 104 | 2.631 | 1.295 | 5.345  | 0.007 |
|    | Urinary Tract                                                  | 37  | 0.282 | 0.092 | 0.865  | 0.027 |
|    | Skin or Cutaneous Sites                                        | 19  | 2.195 | 0.707 | 6.809  | 0.174 |
|    | Completion of the administration of antibiotics within 3 hours | 205 | 0.395 | 0.152 | 1.029  | 0.057 |
|    | Respiratory support                                            |     |       |       |        |       |
|    | Mechanical ventilation                                         | 173 | 4.070 | 1.696 | 9.770  | 0.002 |
|    | Additional ICU support                                         |     |       |       |        |       |
|    | Surgical source control                                        | 25  | 0.384 | 0.124 | 1.192  | 0.098 |
|    | Constant                                                       |     | 0.224 |       |        | 0.008 |
| 15 | University affiliation                                         |     |       |       |        |       |
|    | No                                                             | 153 | Ref.  |       |        | NA    |
|    | Yes                                                            | 99  | 2.024 | 0.953 | 4.299  | 0.066 |
|    | Training program in ICU                                        |     |       |       |        |       |
|    | No                                                             | 50  | Ref.  |       |        | NA    |
|    | Yes                                                            | 202 | 0.308 | 0.121 | 0.788  | 0.014 |
|    | Cardiovascular disease                                         | 78  | 2.218 | 1.026 | 4.795  | 0.043 |
|    | Chronic neurological disease                                   | 36  | 0.196 | 0.063 | 0.609  | 0.005 |
|    | SOFA                                                           |     |       |       |        |       |
|    | < 8                                                            | 140 | Ref.  |       |        | NA    |

|    |                                                                |     |       |       |       |       |
|----|----------------------------------------------------------------|-----|-------|-------|-------|-------|
|    | ≥ 8                                                            | 110 | 2.358 | 1.161 | 4.789 | 0.018 |
|    | APACHE II                                                      |     |       |       |       |       |
|    | < 21                                                           | 148 | Ref.  |       |       | NA    |
|    | ≥ 21                                                           | 104 | 2.625 | 1.296 | 5.316 | 0.007 |
|    | Urinary Tract                                                  | 37  | 0.280 | 0.091 | 0.863 | 0.027 |
|    | Completion of the administration of antibiotics within 3 hours | 205 | 0.400 | 0.155 | 1.032 | 0.058 |
|    | Respiratory support                                            |     |       |       |       |       |
|    | Mechanical ventilation                                         | 173 | 3.893 | 1.644 | 9.220 | 0.002 |
|    | Additional ICU support                                         |     |       |       |       |       |
|    | Surgical source control                                        | 25  | 0.406 | 0.131 | 1.264 | 0.120 |
|    | Constant                                                       |     | 0.264 |       |       | 0.015 |
| 16 | University affiliation                                         |     |       |       |       |       |
|    | No                                                             | 153 | Ref.  |       |       | NA    |
|    | Yes                                                            | 99  | 1.852 | 0.884 | 3.879 | 0.103 |
|    | Training program in ICU                                        |     |       |       |       |       |
|    | No                                                             | 50  | Ref.  |       |       | NA    |
|    | Yes                                                            | 202 | 0.312 | 0.123 | 0.787 | 0.014 |
|    | Cardiovascular disease                                         | 78  | 2.286 | 1.065 | 4.909 | 0.034 |
|    | Chronic neurological disease                                   | 36  | 0.206 | 0.067 | 0.637 | 0.006 |
|    | SOFA                                                           |     |       |       |       |       |
|    | < 8                                                            | 140 | Ref.  |       |       | NA    |
|    | ≥ 8                                                            | 110 | 2.450 | 1.217 | 4.929 | 0.012 |
|    | APACHE II                                                      |     |       |       |       |       |
|    | < 21                                                           | 148 | Ref.  |       |       | NA    |
|    | ≥ 21                                                           | 104 | 2.665 | 1.327 | 5.352 | 0.006 |
|    | Urinary Tract                                                  | 37  | 0.283 | 0.094 | 0.852 | 0.025 |
|    | Completion of the administration of antibiotics within 3 hours | 205 | 0.377 | 0.147 | 0.969 | 0.043 |
|    | Respiratory support                                            |     |       |       |       |       |
|    | Mechanical ventilation                                         | 173 | 3.754 | 1.592 | 8.856 | 0.003 |
|    | Constant                                                       |     | 0.248 |       |       | 0.010 |
| 17 | Training program in ICU                                        |     |       |       |       |       |
|    | No                                                             | 50  | Ref.  |       |       | NA    |
|    | Yes                                                            | 202 | 0.392 | 0.162 | 0.949 | 0.038 |
|    | Cardiovascular disease                                         | 78  | 2.181 | 1.019 | 4.664 | 0.044 |
|    | Chronic neurological disease                                   | 36  | 0.179 | 0.058 | 0.546 | 0.003 |
|    | SOFA                                                           |     |       |       |       |       |
|    | < 8                                                            | 140 | Ref.  |       |       | NA    |
|    | ≥ 8                                                            | 110 | 2.717 | 1.371 | 5.382 | 0.004 |

|  |                                                                |     |       |       |        |        |
|--|----------------------------------------------------------------|-----|-------|-------|--------|--------|
|  | APACHE II                                                      |     |       |       |        |        |
|  | < 21                                                           | 148 | Ref.  |       |        | NA     |
|  | ≥ 21                                                           | 104 | 2.668 | 1.338 | 5.321  | 0.005  |
|  | Urinary Tract                                                  | 37  | 0.312 | 0.105 | 0.932  | 0.037  |
|  | Completion of the administration of antibiotics within 3 hours | 205 | 0.381 | 0.151 | 0.965  | 0.042  |
|  | Respiratory support                                            |     |       |       |        |        |
|  | Mechanical ventilation                                         | 173 | 4.391 | 1.912 | 10.085 | <0.001 |
|  | Constant                                                       |     | 0.230 |       |        | 0.007  |

Abbreviations: **AOR**: adjusted odds ratio; **APACHE II**, Acute Physiology and Chronic Health Examination II; **CI**: confidence interval; **ICU**, intensive care unit; **NA**: not available; **Ref.**, reference; **SOFA**, Sequential (Sepsis-Related) Organ Failure Assessment.

**Table S17.** Factors associated with intensive care unit mortality in patients with sepsis: univariable regression analyses

| Factors                           | Number of patients | OR    | 95.0% CI for OR |       | P      |
|-----------------------------------|--------------------|-------|-----------------|-------|--------|
|                                   |                    |       | Lower           | Upper |        |
| Participating hospital            |                    |       |                 |       |        |
| 115 People's                      | 25                 | Ref.  |                 |       | 0.005  |
| Bach Mai                          | 26                 | 0.243 | 0.075           | 0.789 | 0.019  |
| Bai Chay                          | 14                 | 0.156 | 0.036           | 0.664 | 0.012  |
| Can Tho                           | 7                  | 0.292 | 0.052           | 1.650 | 0.163  |
| Cho Ray                           | 41                 | 0.336 | 0.116           | 0.976 | 0.045  |
| Da Nang                           | 12                 | 0.389 | 0.093           | 1.624 | 0.195  |
| Dong Da                           | 9                  | 0.194 | 0.038           | 1.000 | 0.050  |
| Hanoi Medical University          | 12                 | 0.389 | 0.093           | 1.624 | 0.195  |
| Hue                               | 39                 | 0.100 | 0.031           | 0.323 | <0.001 |
| Saint Paul                        | 9                  | 0.000 | 0.000           | NA    | 0.999  |
| Thai Nguyen                       | 2                  | 0.389 | 0.021           | 7.111 | 0.524  |
| Thanh Nhan                        | 1                  | 0.000 | 0.000           | NA    | >0.999 |
| Vietnam–Czechoslovakia Friendship | 48                 | 0.056 | 0.016           | 0.189 | <0.001 |
| Vinmec Times City International   | 7                  | 0.000 | 0.000           | NA    | 0.999  |
| <b>Hospital characteristics</b>   |                    |       |                 |       |        |
| University affiliation            |                    |       |                 |       |        |
| No                                | 153                | Ref.  |                 |       | NA     |
| Yes                               | 99                 | 2.260 | 1.322           | 3.862 | 0.003  |
| <b>ICU characteristics</b>        |                    |       |                 |       |        |
| Type of ICU                       |                    |       |                 |       |        |
| Medical                           | 110                | Ref.  |                 |       | NA     |

|                                     |     |                |       |        |        |
|-------------------------------------|-----|----------------|-------|--------|--------|
| Mixed                               | 142 | 1.050          | 0.619 | 1.781  | 0.857  |
| Nurse to patient ratio              |     |                |       |        |        |
| 1 nurse : 4 or more patients        | 58  | Ref.           |       |        | 0.660  |
| 1 or more nurses : 1 patient        | 7   | 0.000          | 0.000 | NA     | 0.999  |
| 1 nurse : 2 patients                | 187 | 1.347          | 0.710 | 2.553  | 0.362  |
| Intensivist to patient ratio        |     |                |       |        |        |
| 1 intensivist : 5 or fewer patients | 165 | Ref.           |       |        | 0.082  |
| 1 intensivist : 6 to 8 patients     | 75  | 0.553          | 0.298 | 1.025  | 0.060  |
| 1 intensivist : 12 or more patients | 12  | 1.750          | 0.540 | 5.668  | 0.351  |
| Training programme in ICU           |     |                |       |        |        |
| No                                  | 50  | Ref.           |       |        | NA     |
| Yes                                 | 202 | 0.458          | 0.243 | 0.861  | 0.015  |
| <b>Baseline characteristics</b>     |     |                |       |        |        |
| Age (year)                          | 252 | 0.998          | 0.983 | 1.014  | 0.802  |
| Age (year) group                    |     |                |       |        |        |
| < 20                                | 3   | Ref.           |       |        |        |
| 20 - 39                             | 19  | 1.455          | 0.112 | 18.956 | 0.775  |
| 40 - 59                             | 74  | 1.020          | 0.088 | 11.805 | 0.987  |
| ≥ 60                                | 156 | 0.943          | 0.084 | 10.651 | 0.962  |
| Sex (male)                          | 162 | 0.728          | 0.417 | 1.272  | 0.265  |
| Collection batch                    |     |                |       |        |        |
| Collection 1 (Jan)                  | 80  | Ref.           |       |        | 0.038  |
| Collection 2 (April)                | 62  | 2.821          | 1.377 | 5.779  | 0.005  |
| Collection 3 (July)                 | 54  | 1.743          | 0.815 | 3.725  | 0.152  |
| Collection 4 (Oct)                  | 56  | 1.399          | 0.649 | 3.016  | 0.391  |
| Admission type                      |     |                |       |        |        |
| Medical                             | 236 | Ref.           |       |        | 0.620  |
| Elective surgical                   | 2   | 0.000          | 0.000 | NA     | 0.999  |
| Unscheduled surgical                | 14  | 0.522          | 0.142 | 1.924  | 0.329  |
| Admission source                    |     |                |       |        |        |
| Emergency department                | 138 | Ref.           |       |        | 0.615  |
| Operating room                      | 4   | 0.712          | 0.072 | 7.041  | 0.772  |
| General wards                       | 56  | 0.931          | 0.475 | 1.825  | 0.836  |
| Other ICUs or HDU                   | 16  | 0.712          | 0.217 | 2.333  | 0.575  |
| Inter-hospital transfer             | 37  | 1.816          | 0.867 | 3.802  | 0.114  |
| Others                              | 1   | 34512417<br>56 | 0.000 | NA     | >0.999 |
| Comorbidities                       |     |                |       |        |        |
| Cardiovascular disease              | 78  | 1.506          | 0.863 | 2.627  | 0.150  |
| Chronic lung disease                | 30  | 0.840          | 0.367 | 1.924  | 0.680  |



|                                          |     |        |       |        |        |
|------------------------------------------|-----|--------|-------|--------|--------|
| Chronic neurological disease             | 36  | 0.526  | 0.229 | 1.212  | 0.131  |
| Chronic kidney disease                   | 23  | 0.864  | 0.341 | 2.188  | 0.757  |
| Peptic ulcer disease                     | 9   | 1.000  | 0.244 | 4.101  | >0.999 |
| Chronic liver disease                    | 27  | 1.200  | 0.524 | 2.750  | 0.666  |
| Diabetes mellitus                        | 67  | 1.063  | 0.589 | 1.917  | 0.840  |
| Connective tissue disease                | 3   | 1.000  | 0.089 | 11.188 | >0.999 |
| Immunosuppression                        | 10  | 0.852  | 0.215 | 3.381  | 0.820  |
| Haematological malignancies              | 5   | 1.341  | 0.220 | 8.186  | 0.750  |
| Solid malignant tumours                  | 12  | 2.077  | 0.649 | 6.648  | 0.218  |
| <b>Vital signs</b>                       |     |        |       |        |        |
| GCS                                      | 251 | 0.589  | 0.794 | 0.930  | <0.001 |
| HR (beats per min)                       | 252 | 1.017  | 1.003 | 1.030  | 0.014  |
| Temperature (°C)                         | 252 | 0.910  | 0.700 | 1.184  | 0.484  |
| MBP (mmHg)                               | 252 | 0.978  | 0.965 | 0.992  | 0.002  |
| SBP (mmHg)                               | 252 | 0.985  | 0.976 | 0.995  | 0.002  |
| RR (breaths per min)                     | 252 | 0.993  | 0.949 | 1.040  | 0.774  |
| <b>Blood investigations</b>              |     |        |       |        |        |
| Total WBC (x10 <sup>9</sup> /L)          | 252 | 1.001  | 0.973 | 1.030  | 0.941  |
| PLT (x10 <sup>9</sup> /L)                | 252 | 0.997  | 0.994 | 0.999  | 0.005  |
| Hb (g/dL)                                | 251 | 0.918  | 0.828 | 1.018  | 0.105  |
| Hct (%)                                  | 252 | 0.973  | 0.940 | 1.007  | 0.123  |
| K <sup>+</sup> (mmol/L)                  | 252 | 0.966  | 0.692 | 1.348  | 0.837  |
| Na <sup>+</sup> (mmol/L)                 | 252 | 1.038  | 1.005 | 1.073  | 0.025  |
| Creatinine (μmol/L)                      | 252 | 1.000  | 0.998 | 1.002  | 0.926  |
| Bilirubin (μmol/l)                       | 232 | 1.001  | 0.997 | 1.005  | 0.631  |
| pH                                       | 248 | 0.131  | 0.016 | 1.108  | 0.062  |
| PaO <sub>2</sub> (mmHg)                  | 244 | 1.002  | 0.999 | 1.006  | 0.212  |
| FiO <sub>2</sub>                         | 245 | 11.704 | 3.405 | 40.224 | <0.001 |
| PaO <sub>2</sub> /FiO <sub>2</sub> ratio | 243 | 0.998  | 0.997 | 1.000  | 0.119  |
| <b>Severity of illness scores</b>        |     |        |       |        |        |
| qSOFA                                    | 252 | 1.768  | 1.231 | 2.540  | 0.002  |
| qSOFA                                    |     |        |       |        |        |
| 0 - 1                                    | 69  | Ref.   |       |        | NA     |
| 2 - 3                                    | 183 | 1.959  | 1.039 | 3.694  | 0.038  |
| SIRS                                     | 252 | 1.045  | 0.798 | 1.368  | 0.750  |
| SOFA                                     | 250 | 1.244  | 1.149 | 1.346  | <0.001 |
| SOFA                                     |     |        |       |        |        |
| 2 - 3                                    | 46  | Ref.   |       |        | <0.001 |
| 4 - 5                                    | 36  | 1.147  | 0.373 | 3.527  | 0.811  |
| 6 - 7                                    | 58  | 1.239  | 0.459 | 3.343  | 0.672  |
| 8 - 9                                    | 32  | 2.850  | 1.002 | 8.109  | 0.050  |
| 10 - 11                                  | 38  | 3.845  | 1.422 | 10.401 | 0.008  |

|                            |     |                 |       |        |        |
|----------------------------|-----|-----------------|-------|--------|--------|
| 12 - 14                    | 29  | 10.556          | 3.529 | 31.569 | <0.001 |
| > 14                       | 11  | 12.667          | 2.742 | 58.517 | 0.001  |
| <b>SOFA</b>                |     |                 |       |        |        |
| < 10                       | 172 | Ref.            |       |        | NA     |
| ≥ 10                       | 78  | 4.650           | 2.620 | 8.254  | <0.001 |
| <b>APACHE II</b>           | 252 | 1.076           | 1.039 | 1.114  | <0.001 |
| <b>APACHE II</b>           |     |                 |       |        |        |
| 0 - 4                      | 3   | Ref.            |       |        | 0.002  |
| 5 - 9                      | 22  | 47512569<br>8.2 | 0.000 | NA     | 0.999  |
| 10 - 14                    | 61  | 27959319<br>9.3 | 0.000 | NA     | 0.999  |
| 15 - 19                    | 52  | 71796772<br>1.6 | 0.000 | NA     | 0.999  |
| 20 - 24                    | 58  | 13125347<br>41  | 0.000 | -NA    | 0.999  |
| 25 - 29                    | 28  | 24965695<br>78  | 0.000 | NA     | 0.999  |
| 30 - 34                    | 19  | 74558186<br>4.8 | 0.000 | NA     | 0.999  |
| > 34                       | 9   | 20192842<br>17  | 0.000 | NA     | 0.999  |
| <b>APACHE II</b>           |     |                 |       |        |        |
| < 19                       | 129 | Ref.            |       |        | NA     |
| ≥ 19                       | 123 | 3.535           | 1.025 | 6.171  | <0.001 |
| <b>Site of Infection</b>   |     |                 |       |        |        |
| Respiratory                | 143 | 1.186           | 0.697 | 2.018  | 0.529  |
| Urinary tract              | 37  | 0.340           | 0.136 | 0.851  | 0.021  |
| Abdominal                  | 61  | 1.416           | 0.779 | 2.575  | 0.254  |
| Neurological               | 12  | 0.654           | 0.172 | 2.483  | 0.533  |
| Bones or joints            | 2   | 0.000           | 0.000 | NA     | 0.999  |
| Skin or cutaneous sites    | 19  | 2.387           | 0.931 | 6.123  | 0.070  |
| Intravascular catheter     | 1   | 0.000           | 0.000 | NA     | >0.999 |
| Infective endocarditis     | 1   | 32698768<br>34  | 0.000 | NA     | >0.999 |
| Primary bacteraemia        | 7   | 0.325           | 0.039 | 2.747  | 0.302  |
| Systemic                   | 6   | 1.000           | 0.179 | 5.573  | >0.999 |
| <b>Microbiology</b>        |     |                 |       |        |        |
| <b>Pathogens detection</b> |     |                 |       |        |        |
| No pathogens detected      | 67  | 0.599           | 0.320 | 1.121  | 0.109  |
| Gram negative bacteria     | 156 | 1.258           | 0.729 | 2.171  | 0.409  |
| Gram positive bacteria     | 34  | 0.950           | 0.439 | 2.055  | 0.896  |

|                                                                       |     |                |       |       |       |
|-----------------------------------------------------------------------|-----|----------------|-------|-------|-------|
| Fungi                                                                 | 7   | 1.519          | 0.332 | 6.946 | 0.590 |
| Viruses                                                               | 2   | 33097533<br>84 | 0.000 | NA    | 0.999 |
| Other pathogens                                                       | 4   | 0.663          | 0.068 | 6.469 | 0.723 |
| <b>Completion of sepsis bundle elements</b>                           |     |                |       |       |       |
| Timing of antibiotics administration                                  |     |                |       |       |       |
| 0-60 minutes                                                          | 173 | Ref.           |       |       | 0.693 |
| 61-120 minutes                                                        | 21  | 1.132          | 0.432 | 2.966 | 0.801 |
| 121-180 minutes                                                       | 14  | 0.617          | 0.165 | 2.304 | 0.473 |
| >180 minutes                                                          | 17  | 1.585          | 0.572 | 4.389 | 0.376 |
| Timing of obtaining blood cultures                                    |     |                |       |       |       |
| 0-60 minutes                                                          | 135 | Ref.           |       |       | 0.557 |
| 61-120 minutes                                                        | 14  | 1.812          | 0.600 | 5.474 | 0.292 |
| 121-180 minutes                                                       | 10  | 0.777          | 0.192 | 3.143 | 0.723 |
| >180 minutes                                                          | 38  | 0.738          | 0.337 | 1.618 | 0.449 |
| Timing of obtaining lactate measurement                               |     |                |       |       |       |
| 0-60 minutes                                                          | 141 | Ref.           |       |       | 0.785 |
| 61-120 minutes                                                        | 10  | 1.377          | 0.370 | 5.119 | 0.633 |
| 121-180 minutes                                                       | 6   | 0.413          | 0.047 | 3.638 | 0.426 |
| >180 minutes                                                          | 41  | 0.855          | 0.400 | 1.826 | 0.685 |
| Completion of the sepsis bundle within 1 hour                         | 87  | 0.931          | 0.532 | 1.630 | 0.802 |
| Completion of the initial administration of antibiotics within 1 hour | 173 | 0.671          | 0.374 | 1.202 | 0.180 |
| Permutations of the completed elements within 1 hour                  |     |                |       |       |       |
| No elements completed                                                 | 20  | Ref.           |       |       | 0.368 |
| Antibiotics only                                                      | 44  | 0.696          | 0.224 | 2.163 | 0.532 |
| Blood cultures only                                                   | 13  | 0.825          | 0.185 | 3.676 | 0.801 |
| Lactate only                                                          | 23  | 1.702          | 0.497 | 5.826 | 0.397 |
| Antibiotics + Lactate                                                 | 17  | 0.248          | 0.044 | 1.408 | 0.115 |
| Antibiotics + Blood cultures                                          | 25  | 1.459          | 0.434 | 4.901 | 0.541 |
| Blood cultures + Lactate                                              | 12  | 1.327          | 0.305 | 5.770 | 0.706 |
| Antibiotics + Blood cultures + Lactate                                | 87  | 0.881          | 0.317 | 2.452 | 0.809 |
| Completion of the sepsis bundle within 3 hours                        | 108 | 0.938          | 0.546 | 1.609 | 0.815 |

|                                                                        |     |       |       |        |        |
|------------------------------------------------------------------------|-----|-------|-------|--------|--------|
| Completion of the initial administration of antibiotics within 3 hours | 205 | 0.434 | 0.211 | 0.889  | 0.023  |
| Permutation of the completed elements of 3-hour sepsis bundle          |     |       |       |        |        |
| No elements completed                                                  | 8   | Ref.  |       |        | 0.141  |
| Antibiotics only                                                       | 37  | 0.276 | 0.056 | 1.355  | 0.113  |
| Blood cultures only                                                    | 5   | 1.500 | 0.156 | 14.420 | 0.725  |
| Lactate only                                                           | 16  | 0.778 | 0.142 | 4.265  | 0.772  |
| Antibiotics + Lactate                                                  | 24  | 0.200 | 0.035 | 1.154  | 0.072  |
| Antibiotics + Blood cultures                                           | 36  | 0.714 | 0.154 | 3.319  | 0.668  |
| Blood cultures + Lactate                                               | 7   | 1.333 | 0.173 | 10.254 | 0.782  |
| Antibiotics + Blood cultures + Lactate                                 | 108 | 0.479 | 0.113 | 2.030  | 0.318  |
| <b>Life-sustaining treatments during ICU stay</b>                      |     |       |       |        |        |
| Respiratory support                                                    |     |       |       |        |        |
| Mechanical ventilation                                                 | 173 | 6.856 | 3.109 | 15.116 | <0.001 |
| Duration of mechanical ventilation                                     | 167 | 1.005 | 0.976 | 1.036  | 0.722  |
| Non-invasive ventilation                                               | 20  | 0.841 | 0.311 | 2.273  | 0.732  |
| Duration of non-invasive ventilation                                   | 20  | 7.408 | 1.097 | 50.015 | 0.040  |
| High-flow nasal oxygen                                                 | 38  | 0.257 | 0.096 | 0.685  | 0.007  |
| Duration of high-flow nasal oxygen                                     | 33  | 1.369 | 0.953 | 1.967  | 0.089  |
| Additional ICU support                                                 |     |       |       |        |        |
| Vasopressors/inotropes                                                 | 163 | 2.956 | 1.600 | 5.460  | 0.001  |
| Renal replacement therapy                                              | 101 | 4.239 | 2.432 | 7.388  | <0.001 |
| Red blood cell transfusion                                             | 93  | 1.682 | 0.983 | 2.879  | 0.058  |
| Platelet transfusion                                                   | 50  | 2.966 | 1.571 | 5.597  | 0.001  |
| Fresh frozen plasma transfusion                                        | 58  | 1.891 | 1.036 | 3.453  | 0.038  |
| Surgical source control                                                | 25  | 0.599 | 0.230 | 1.562  | 0.295  |
| Non-surgical source control                                            | 78  | 0.535 | 0.293 | 0.977  | 0.042  |

Abbreviations: **APACHE II**, Acute Physiology and Chronic Health Examination II; **CI**: confidence interval; **ICU**, intensive care unit; **NA**: not available; **OR**: odds ratio; **qSOFA**, quick Sequential (Sepsis-Related) Organ Failure Assessment; **Ref.**, reference; **SIRS**, systemic inflammatory response syndrome; **SOFA**, Sequential (Sepsis-Related) Organ Failure Assessment.

**Table S18.** Factors associated with intensive care unit mortality in patients with sepsis: multivariable logistic regression analyses (backward elimination)

| Step | Factors                                                       | Number of patients | Adjusted OR | 95.0% CI for adjusted OR |        | p     |
|------|---------------------------------------------------------------|--------------------|-------------|--------------------------|--------|-------|
|      |                                                               |                    |             | Lower                    | Upper  |       |
| 1    | University affiliation                                        |                    |             |                          |        |       |
|      | No                                                            | 153                | Ref.        |                          |        | NA    |
|      | Yes                                                           | 99                 | 2.512       | 1.020                    | 6.188  | 0.045 |
|      | Intensivist to patient ratio                                  |                    |             |                          |        |       |
|      | 1 intensivist : 5 or fewer patients                           | 165                | Ref.        |                          |        | 0.111 |
|      | 1 intensivist : 6 to 8 patients                               | 75                 | 3.315       | 1.069                    | 10.286 | 0.038 |
|      | 1 intensivist : 12 or more patients                           | 12                 | 1.278       | 0.244                    | 6.712  | 0.772 |
|      | Training program in ICU                                       |                    |             |                          |        |       |
|      | No                                                            | 50                 | Ref.        |                          |        | NA    |
|      | Yes                                                           | 202                | 0.277       | 0.095                    | 0.807  | 0.019 |
|      | Cardiovascular disease                                        | 78                 | 2.026       | 0.870                    | 4.718  | 0.102 |
|      | Chronic neurological disease                                  | 36                 | 0.815       | 0.240                    | 2.773  | 0.744 |
|      | Solid malignant tumors                                        | 12                 | 5.711       | 1.256                    | 25.979 | 0.024 |
|      | SOFA                                                          |                    |             |                          |        |       |
|      | < 10                                                          | 172                | Ref.        |                          |        | NA    |
|      | ≥ 10                                                          | 78                 | 3.022       | 1.267                    | 7.208  | 0.013 |
|      | APACHE II                                                     |                    |             |                          |        |       |
|      | < 19                                                          | 129                | Ref.        |                          |        | NA    |
|      | ≥ 19                                                          | 123                | 1.623       | 0.676                    | 3.900  | 0.279 |
|      | Urinary Tract                                                 | 37                 | 0.191       | 0.050                    | 0.723  | 0.015 |
|      | Abdominal                                                     | 61                 | 0.852       | 0.314                    | 2.308  | 0.752 |
|      | Skin or Cutaneous Sites                                       | 19                 | 3.648       | 0.948                    | 14.032 | 0.060 |
|      | Pathogens detection                                           |                    |             |                          |        |       |
|      | No pathogens detected                                         | 67                 | 1.298       | 0.336                    | 5.018  | 0.706 |
|      | Gram-negative bacteria                                        | 156                | 1.413       | 0.432                    | 4.628  | 0.568 |
|      | Completion of the sepsis bundle within 1 hour                 | 87                 | 0.946       | 0.228                    | 3.937  | 0.940 |
|      | Completion of the administration of antibiotics within 1 hour | 173                | 1.622       | 0.293                    | 8.964  | 0.579 |
|      | Completion of the sepsis bundle within 3 hours                | 108                | 0.898       | 0.214                    | 3.771  | 0.884 |
|      | Completion of the                                             | 205                | 0.239       | 0.037                    | 1.545  | 0.133 |

|   |                                              |     |       |       |        |       |
|---|----------------------------------------------|-----|-------|-------|--------|-------|
|   | administration of antibiotics within 3 hours |     |       |       |        |       |
|   | Respiratory support                          |     |       |       |        |       |
|   | Mechanical ventilation                       | 173 | 2.813 | 0.939 | 8.432  | 0.065 |
|   | High-flow nasal oxygen                       | 38  | 0.181 | 0.035 | 0.925  | 0.040 |
|   | Additional ICU support                       |     |       |       |        |       |
|   | Vasopressors/inotropes                       | 163 | 0.899 | 0.327 | 2.471  | 0.836 |
|   | Renal replacement therapy                    | 101 | 3.551 | 1.471 | 8.569  | 0.005 |
|   | Red blood cell transfusion                   | 93  | 0.612 | 0.258 | 1.451  | 0.264 |
|   | Platelet transfusion                         | 50  | 1.384 | 0.536 | 3.569  | 0.502 |
|   | Fresh frozen plasma transfusion              | 58  | 1.427 | 0.573 | 3.553  | 0.445 |
|   | Surgical source control                      | 25  | 0.662 | 0.182 | 2.404  | 0.531 |
|   | Non-surgical source control                  | 78  | 0.322 | 0.132 | 0.783  | 0.012 |
|   | Constant                                     |     | 0.118 |       |        | 0.013 |
| 2 | University affiliation                       |     |       |       |        |       |
|   | No                                           | 153 | Ref.  |       |        | NA    |
|   | Yes                                          | 99  | 2.507 | 1.019 | 6.170  | 0.045 |
|   | Intensivist to patient ratio                 |     |       |       |        |       |
|   | 1 intensivist : 5 or fewer patients          | 165 | Ref.  |       |        | 0.108 |
|   | 1 intensivist : 6 to 8 patients              | 75  | 3.295 | 1.074 | 10.110 | 0.037 |
|   | 1 intensivist : 12 or more patients          | 12  | 1.288 | 0.249 | 6.675  | 0.763 |
|   | Training program in ICU                      |     |       |       |        |       |
|   | No                                           | 50  | Ref.  |       |        | NA    |
|   | Yes                                          | 202 | 0.278 | 0.096 | 0.807  | 0.019 |
|   | Cardiovascular disease                       | 78  | 2.030 | 0.873 | 4.720  | 0.100 |
|   | Chronic neurological disease                 | 36  | 0.813 | 0.239 | 2.758  | 0.739 |
|   | Solid malignant tumors                       | 12  | 5.677 | 1.259 | 25.608 | 0.024 |
|   | SOFA                                         |     |       |       |        |       |
|   | < 10                                         | 172 | Ref.  |       |        | NA    |
|   | ≥ 10                                         | 78  | 3.031 | 1.275 | 7.208  | 0.012 |
|   | APACHE II                                    |     |       |       |        |       |
|   | < 19                                         | 129 | Ref.  |       |        | NA    |
|   | ≥ 19                                         | 123 | 1.617 | 0.677 | 3.860  | 0.279 |

|   |                                                                |     |           |       |        |       |
|---|----------------------------------------------------------------|-----|-----------|-------|--------|-------|
|   | Urinary Tract                                                  | 37  | 0.190     | 0.050 | 0.720  | 0.015 |
|   | Abdominal                                                      | 61  | 0.855     | 0.317 | 2.304  | 0.757 |
|   | Skin or Cutaneous Sites                                        | 19  | 3.633     | 0.949 | 13.907 | 0.060 |
|   | Pathogens detection                                            |     |           |       |        |       |
|   | No pathogens detected                                          | 67  | 1.297     | 0.335 | 5.012  | 0.707 |
|   | Gram-negative bacteria                                         | 156 | 1.418     | 0.434 | 4.629  | 0.563 |
|   | Completion of the administration of antibiotics within 1 hour  | 173 | 1.624     | 0.294 | 8.977  | 0.578 |
|   | Completion of the sepsis bundle within 3 hours                 | 108 | 0.858     | 0.377 | 1.954  | 0.716 |
|   | Completion of the administration of antibiotics within 3 hours | 205 | 0.239     | 0.037 | 1.544  | 0.133 |
|   | Respiratory support                                            |     |           |       |        |       |
|   | Mechanical ventilation                                         | 173 | 2.813     | 0.938 | 8.432  | 0.065 |
|   | High-flow nasal oxygen                                         | 38  | 0.182     | 0.036 | 0.925  | 0.040 |
|   | Additional ICU support                                         |     |           |       |        |       |
|   | Vasopressors/inotropes                                         | 163 | 0.898     | 0.327 | 2.469  | 0.835 |
|   | Renal replacement therapy                                      | 101 | 3.544     | 1.470 | 8.540  | 0.005 |
|   | Red blood cell transfusion                                     | 93  | 0.611     | 0.258 | 1.450  | 0.264 |
|   | Platelet transfusion                                           | 50  | 1.384     | 0.537 | 3.570  | 0.501 |
|   | Fresh frozen plasma transfusion                                | 58  | 1.425     | 0.572 | 3.550  | 0.446 |
|   | Surgical source control                                        | 25  | 0.659     | 0.182 | 2.380  | 0.524 |
|   | Non-surgical source control                                    | 78  | 0.322     | 0.132 | 0.782  | 0.012 |
|   | Constant                                                       |     | 0.118     |       |        | 0.013 |
| 3 | University affiliation                                         |     |           |       |        |       |
|   | No                                                             | 153 | Reference |       |        | NA    |
|   | Yes                                                            | 99  | 2.509     | 1.019 | 6.180  | 0.045 |
|   | Intensivist to patient ratio                                   |     |           |       |        |       |
|   | 1 intensivist : 5 or fewer patients                            | 165 | Reference |       |        | 0.108 |
|   | 1 intensivist : 6 to 8 patients                                | 75  | 3.300     | 1.076 | 10.120 | 0.037 |
|   | 1 intensivist : 12 or more patients                            | 12  | 1.311     | 0.256 | 6.722  | 0.746 |
|   | Training program in ICU                                        |     |           |       |        |       |

|                                                                |     |       |       |        |       |
|----------------------------------------------------------------|-----|-------|-------|--------|-------|
| No                                                             | 50  | Ref.  |       |        | NA    |
| Yes                                                            | 202 | 0.272 | 0.095 | 0.778  | 0.015 |
| Cardiovascular disease                                         | 78  | 2.043 | 0.881 | 4.741  | 0.096 |
| Chronic neurological disease                                   | 36  | 0.821 | .243  | 2.776  | 0.751 |
| Solid malignant tumors                                         | 12  | 5.733 | 1.272 | 25.841 | 0.023 |
| SOFA                                                           |     |       |       |        |       |
| < 10                                                           | 172 | Ref.  |       |        | NA    |
| ≥ 10                                                           | 78  | 2.957 | 1.285 | 6.806  | 0.011 |
| APACHE II                                                      |     |       |       |        |       |
| < 19                                                           | 129 | Ref.  |       |        | NA    |
| ≥ 19                                                           | 123 | 1.604 | 0.674 | 3.817  | 0.285 |
| Urinary Tract                                                  | 37  | 0.190 | 0.050 | 0.719  | 0.015 |
| Abdominal                                                      | 61  | 0.856 | 0.318 | 2.307  | 0.759 |
| Skin or Cutaneous Sites                                        | 19  | 3.605 | 0.945 | 13.751 | 0.060 |
| Pathogens detection                                            |     |       |       |        |       |
| No pathogens detected                                          | 67  | 1.277 | 0.333 | 4.893  | 0.721 |
| Gram-negative bacteria                                         | 156 | 1.405 | 0.432 | 4.570  | 0.572 |
| Completion of the administration of antibiotics within 1 hour  | 173 | 1.624 | 0.293 | 9.016  | 0.579 |
| Completion of the sepsis bundle within 3 hours                 | 108 | 0.851 | 0.375 | 1.931  | 0.700 |
| Completion of the administration of antibiotics within 3 hours | 205 | 0.240 | 0.037 | 1.553  | 0.134 |
| Respiratory support                                            |     |       |       |        |       |
| Mechanical ventilation                                         | 173 | 2.722 | .951  | 7.789  | 0.062 |
| High-flow nasal oxygen                                         | 38  | 0.181 | .036  | 0.924  | 0.040 |
| Additional ICU support                                         |     | 3.464 | 1.478 | 8.117  | 0.004 |
| Renal replacement therapy                                      | 101 | 0.604 | 0.256 | 1.425  | 0.250 |
| Red blood cell transfusion                                     | 93  | 1.393 | 0.541 | 3.586  | 0.492 |
| Platelet transfusion                                           | 50  | 1.431 | 0.574 | 3.566  | 0.442 |
| Fresh frozen plasma transfusion                                | 58  | 0.656 | 0.182 | 2.368  | 0.520 |
| Surgical source control                                        | 25  | 0.323 | 0.133 | 0.784  | 0.013 |
| Non-surgical source control                                    | 78  | 0.118 |       |        | 0.013 |
| Constant                                                       |     | 0.118 |       |        | 0.013 |



|   |                                                                |     |       |       |        |       |
|---|----------------------------------------------------------------|-----|-------|-------|--------|-------|
| 4 | University affiliation                                         |     |       |       |        |       |
|   | No                                                             | 153 | Ref.  |       |        | NA    |
|   | Yes                                                            | 99  | 2.478 | 1.010 | 6.083  | 0.048 |
|   | Intensivist to patient ratio                                   |     |       |       |        |       |
|   | 1 intensivist : 5 or fewer patients                            | 165 | Ref.  |       |        | 0.112 |
|   | 1 intensivist : 6 to 8 patients                                | 75  | 3.255 | 1.064 | 9.957  | 0.039 |
|   | 1 intensivist : 12 or more patients                            | 12  | 1.303 | 0.253 | 6.710  | 0.751 |
|   | Training program in ICU                                        |     |       |       |        |       |
|   | No                                                             | 50  | Ref.  |       |        | NA    |
|   | Yes                                                            | 202 | 0.269 | 0.094 | 0.768  | 0.014 |
|   | Cardiovascular disease                                         | 78  | 2.084 | 0.905 | 4.797  | 0.084 |
|   | Chronic neurological disease                                   | 36  | 0.822 | 0.242 | 2.793  | 0.754 |
|   | Solid malignant tumors                                         | 12  | 5.847 | 1.309 | 26.112 | 0.021 |
|   | SOFA                                                           |     |       |       |        |       |
|   | < 10                                                           | 172 | Ref.  |       |        | NA    |
|   | ≥ 10                                                           | 78  | 2.880 | 1.274 | 6.511  | 0.011 |
|   | APACHE II                                                      |     |       |       |        |       |
|   | < 19                                                           | 129 | Ref.  |       |        | NA    |
|   | ≥ 19                                                           | 123 | 1.632 | 0.690 | 3.861  | 0.265 |
|   | Urinary Tract                                                  | 37  | 0.201 | 0.056 | 0.720  | 0.014 |
|   | Skin or Cutaneous Sites                                        | 19  | 3.688 | 0.969 | 14.039 | 0.056 |
|   | Pathogens detection                                            |     |       |       |        |       |
|   | No pathogens detected                                          | 67  | 1.227 | 0.329 | 4.575  | 0.761 |
|   | Gram-negative bacteria                                         | 156 | 1.400 | 0.432 | 4.540  | 0.575 |
|   | Completion of the administration of antibiotics within 1 hour  | 173 | 1.580 | 0.286 | 8.710  | 0.600 |
|   | Completion of the sepsis bundle within 3 hours                 | 108 | 0.844 | 0.373 | 1.909  | 0.684 |
|   | Completion of the administration of antibiotics within 3 hours | 205 | 0.246 | 0.038 | 1.582  | 0.140 |
|   | Respiratory support                                            |     |       |       |        |       |
|   | Mechanical ventilation                                         | 173 | 2.714 | 0.949 | 7.757  | 0.062 |
|   | High-flow nasal oxygen                                         | 38  | 0.187 | 0.037 | 0.940  | 0.042 |
|   | Additional ICU support                                         |     |       |       |        |       |
|   | Renal replacement                                              | 101 | 3.332 | 1.478 | 7.513  | 0.004 |

|   |                                                               |     |       |       |        |       |
|---|---------------------------------------------------------------|-----|-------|-------|--------|-------|
|   | therapy                                                       |     |       |       |        |       |
|   | Red blood cell transfusion                                    | 93  | .604  | 0.256 | 1.427  | 0.251 |
|   | Platelet transfusion                                          | 50  | 1.425 | 0.558 | 3.634  | 0.459 |
|   | Fresh frozen plasma transfusion                               | 58  | 1.405 | 0.567 | 3.481  | 0.463 |
|   | Surgical source control                                       | 25  | 0.624 | 0.180 | 2.158  | 0.456 |
|   | Non-surgical source control                                   | 78  | 0.328 | 0.136 | 0.792  | 0.013 |
|   | Constant                                                      |     | 0.118 |       |        | 0.013 |
| 5 | University affiliation                                        |     |       |       |        |       |
|   | No                                                            | 153 | Ref.  |       |        | NA    |
|   | Yes                                                           | 99  | 2.509 | 1.026 | 6.136  | .044  |
|   | Intensivist to patient ratio                                  |     |       |       |        |       |
|   | 1 intensivist : 5 or fewer patients                           | 165 | Ref.  |       |        | 0.116 |
|   | 1 intensivist : 6 to 8 patients                               | 75  | 3.206 | 1.054 | 9.756  | 0.040 |
|   | 1 intensivist : 12 or more patients                           | 12  | 1.291 | 0.251 | 6.635  | 0.759 |
|   | Training program in ICU                                       |     |       |       |        |       |
|   | No                                                            | 50  | Ref.  |       |        | NA    |
|   | Yes                                                           | 202 | 0.272 | 0.096 | 0.775  | 0.015 |
|   | Cardiovascular disease                                        | 78  | 2.036 | 0.898 | 4.615  | 0.089 |
|   | Chronic neurological disease                                  | 36  | 0.829 | 0.244 | 2.816  | 0.764 |
|   | Solid malignant tumors                                        | 12  | 5.850 | 1.314 | 26.056 | 0.020 |
|   | SOFA                                                          |     |       |       |        |       |
|   | < 10                                                          | 172 | Ref.  |       |        | NA    |
|   | ≥ 10                                                          | 78  | 2.848 | 1.265 | 6.412  | 0.011 |
|   | APACHE II                                                     |     |       |       |        |       |
|   | < 19                                                          | 129 | Ref.  |       |        | NA    |
|   | ≥ 19                                                          | 123 | 1.629 | 0.689 | 3.853  | 0.267 |
|   | Urinary Tract                                                 | 37  | 0.205 | 0.058 | 0.725  | 0.014 |
|   | Skin or Cutaneous Sites                                       | 19  | 3.469 | 0.968 | 12.432 | 0.056 |
|   | Pathogens detection                                           |     |       |       |        |       |
|   | Gram-negative bacteria                                        | 156 | 1.221 | 0.560 | 2.663  | 0.615 |
|   | Completion of the administration of antibiotics within 1 hour | 173 | 1.592 | 0.289 | 8.754  | 0.593 |
|   | Completion of the sepsis bundle within 3 hours                | 108 | 0.836 | 0.370 | 1.885  | 0.665 |

|   |                                                                |     |       |       |        |       |
|---|----------------------------------------------------------------|-----|-------|-------|--------|-------|
|   | Completion of the administration of antibiotics within 3 hours | 205 | 0.244 | 0.038 | 1.567  | 0.137 |
|   | Respiratory support                                            |     |       |       |        |       |
|   | Mechanical ventilation                                         | 173 | 2.709 | 0.947 | 7.751  | 0.063 |
|   | High-flow nasal oxygen                                         | 38  | 0.191 | 0.038 | 0.950  | 0.043 |
|   | Additional ICU support                                         |     |       |       |        |       |
|   | Renal replacement therapy                                      | 101 | 3.356 | 1.489 | 7.564  | 0.003 |
|   | Red blood cell transfusion                                     | 93  | 0.593 | 0.253 | 1.388  | 0.228 |
|   | Platelet transfusion                                           | 50  | 1.416 | 0.556 | 3.605  | 0.466 |
|   | Fresh frozen plasma transfusion                                | 58  | 1.403 | 0.567 | 3.475  | 0.464 |
|   | Surgical source control                                        | 25  | 0.634 | 0.184 | 2.180  | 0.470 |
|   | Non-surgical source control                                    | 78  | 0.327 | 0.136 | 0.790  | 0.013 |
|   | Constant                                                       |     | 0.137 |       |        | 0.004 |
| 6 | University affiliation                                         |     |       |       |        |       |
|   | No                                                             | 153 | Ref.  |       |        | NA    |
|   | Yes                                                            | 99  | 2.571 | 1.065 | 6.206  | 0.036 |
|   | Intensivist to patient ratio                                   |     |       |       |        |       |
|   | 1 intensivist : 5 or fewer patients                            | 165 | Ref.  |       |        | 0.109 |
|   | 1 intensivist : 6 to 8 patients                                | 75  | 3.251 | 1.071 | 9.872  | 0.037 |
|   | 1 intensivist : 12 or more patients                            | 12  | 1.285 | 0.250 | 6.610  | 0.764 |
|   | Training program in ICU                                        |     |       |       |        |       |
|   | No                                                             | 50  | Ref.  |       |        | NA    |
|   | Yes                                                            | 202 | 0.276 | 0.098 | 0.780  | 0.015 |
|   | Cardiovascular disease                                         | 78  | 1.990 | 0.891 | 4.444  | 0.093 |
|   | Solid malignant tumors                                         | 12  | 6.020 | 1.364 | 26.577 | 0.018 |
|   | SOFA                                                           |     |       |       |        |       |
|   | < 10                                                           | 172 | Ref.  |       |        | NA    |
|   | ≥ 10                                                           | 78  | 2.887 | 1.288 | 6.473  | 0.010 |
|   | APACHE II                                                      |     |       |       |        |       |
|   | < 19                                                           | 129 | Ref.  |       |        | NA    |
|   | ≥ 19                                                           | 123 | 1.596 | 0.681 | 3.740  | 0.282 |
|   | Urinary Tract                                                  | 37  | 0.202 | 0.057 | 0.711  | 0.013 |
|   | Skin or Cutaneous Sites                                        | 19  | 3.549 | 0.993 | 12.684 | 0.051 |

|   |                                                                |     |       |       |        |       |
|---|----------------------------------------------------------------|-----|-------|-------|--------|-------|
|   | Pathogens detection                                            |     |       |       |        |       |
|   | Gram-negative bacteria                                         | 156 | 1.223 | 0.560 | 2.670  | 0.613 |
|   | Completion of the administration of antibiotics within 1 hour  | 173 | 1.614 | 0.293 | 8.895  | 0.582 |
|   | Completion of the sepsis bundle within 3 hours                 | 108 | 0.834 | 0.370 | 1.881  | 0.662 |
|   | Completion of the administration of antibiotics within 3 hours | 205 | 0.236 | 0.037 | 1.506  | 0.127 |
|   | Respiratory support                                            |     |       |       |        |       |
|   | Mechanical ventilation                                         | 173 | 2.690 | 0.942 | 7.683  | 0.065 |
|   | High-flow nasal oxygen                                         | 38  | 0.186 | 0.038 | 0.923  | 0.040 |
|   | Additional ICU support                                         |     |       |       |        |       |
|   | Renal replacement therapy                                      | 101 | 3.418 | 1.530 | 7.635  | 0.003 |
|   | Red blood cell transfusion                                     | 93  | 0.584 | 0.250 | 1.360  | 0.212 |
|   | Platelet transfusion                                           | 50  | 1.425 | 0.559 | 3.629  | 0.458 |
|   | Fresh frozen plasma transfusion                                | 58  | 1.413 | 0.572 | 3.490  | 0.454 |
|   | Surgical source control                                        | 25  | 0.637 | 0.185 | 2.194  | 0.475 |
|   | Non-surgical source control                                    | 78  | 0.320 | 0.134 | 0.764  | 0.010 |
|   | Constant                                                       |     | 0.133 |       |        | 0.003 |
| 7 | University affiliation                                         |     |       |       |        |       |
|   | No                                                             | 153 | Ref.  |       |        | NA    |
|   | Yes                                                            | 99  | 2.552 | 1.059 | 6.147  | 0.037 |
|   | Intensivist to patient ratio                                   |     |       |       |        |       |
|   | 1 intensivist : 5 or fewer patients                            | 165 | Ref.  |       |        | 0.119 |
|   | 1 intensivist : 6 to 8 patients                                | 75  | 3.055 | 1.044 | 8.936  | 0.041 |
|   | 1 intensivist : 12 or more patients                            | 12  | 1.177 | 0.241 | 5.750  | 0.840 |
|   | Training program in ICU                                        |     |       |       |        |       |
|   | No                                                             | 50  | Ref.  |       |        | NA    |
|   | Yes                                                            | 202 | 0.273 | 0.096 | 0.771  | 0.014 |
|   | Cardiovascular disease                                         | 78  | 2.003 | .897  | 4.474  | 0.090 |
|   | Solid malignant tumors                                         | 12  | 5.845 | 1.351 | 25.290 | 0.018 |
|   | SOFA                                                           |     |       |       |        |       |

|   |                                                                |     |       |       |        |       |
|---|----------------------------------------------------------------|-----|-------|-------|--------|-------|
|   | < 10                                                           | 172 | Ref.  |       |        | NA    |
|   | ≥ 10                                                           | 78  | 2.858 | 1.279 | 6.385  | 0.010 |
|   | APACHE II                                                      |     |       |       |        |       |
|   | < 19                                                           | 129 | Ref.  |       |        | NA    |
|   | ≥ 19                                                           | 123 | 1.598 | 0.682 | 3.742  | 0.280 |
|   | Urinary Tract                                                  | 37  | 0.201 | 0.057 | 0.704  | 0.012 |
|   | Skin or Cutaneous Sites                                        | 19  | 3.628 | 1.018 | 12.937 | 0.047 |
|   | Pathogens detection                                            |     |       |       |        |       |
|   | Gram-negative bacteria                                         | 156 | 1.229 | 0.563 | 2.679  | 0.605 |
|   | Completion of the administration of antibiotics within 1 hour  | 173 | 1.735 | 0.326 | 9.238  | 0.518 |
|   | Completion of the administration of antibiotics within 3 hours | 205 | .239  | 0.038 | 1.521  | 0.130 |
|   | Respiratory support                                            |     |       |       |        |       |
|   | Mechanical ventilation                                         | 173 | 2.709 | 0.947 | 7.747  | 0.063 |
|   | High-flow nasal oxygen                                         | 38  | 0.198 | 0.041 | 0.951  | 0.043 |
|   | Additional ICU support                                         |     |       |       |        |       |
|   | Renal replacement therapy                                      | 101 | 3.411 | 1.528 | 7.616  | 0.003 |
|   | Red blood cell transfusion                                     | 93  | 0.596 | 0.258 | 1.378  | 0.227 |
|   | Platelet transfusion                                           | 50  | 1.393 | 0.551 | 3.524  | 0.484 |
|   | Fresh frozen plasma transfusion                                | 58  | 1.449 | 0.592 | 3.550  | 0.417 |
|   | Surgical source control                                        | 25  | 0.653 | 0.191 | 2.230  | 0.497 |
|   | Non-surgical source control                                    | 78  | 0.322 | 0.135 | 0.769  | 0.011 |
|   | Constant                                                       |     | 0.123 |       |        | 0.002 |
| 8 | University affiliation                                         |     |       |       |        |       |
|   | No                                                             | 153 | Ref.  |       |        | NA    |
|   | Yes                                                            | 99  | 2.564 | 1.064 | 6.175  | 0.036 |
|   | Intensivist to patient ratio                                   |     |       |       |        |       |
|   | 1 intensivist : 5 or fewer patients                            | 165 | Ref.  |       |        | 0.107 |
|   | 1 intensivist : 6 to 8 patients                                | 75  | 3.128 | 1.073 | 9.113  | 0.037 |
|   | 1 intensivist : 12 or more patients                            | 12  | 1.195 | 0.246 | 5.798  | 0.825 |
|   | Training program in ICU                                        |     |       |       |        |       |

|   |                                                                |     |       |       |        |       |
|---|----------------------------------------------------------------|-----|-------|-------|--------|-------|
|   | No                                                             | 50  | Ref.  |       |        | NA    |
|   | Yes                                                            | 202 | 0.272 | 0.096 | 0.768  | 0.014 |
|   | Cardiovascular disease                                         | 78  | 2.040 | 0.916 | 4.543  | 0.081 |
|   | Solid malignant tumors                                         | 12  | 5.796 | 1.343 | 25.024 | 0.019 |
|   | SOFA                                                           |     |       |       |        |       |
|   | < 10                                                           | 172 | Ref.  |       |        | NA    |
|   | ≥ 10                                                           | 78  | 2.820 | 1.266 | 6.282  | 0.011 |
|   | APACHE II                                                      |     |       |       |        |       |
|   | < 19                                                           | 129 | Ref.  |       |        | NA    |
|   | ≥ 19                                                           | 123 | 1.578 | 0.676 | 3.683  | 0.292 |
|   | Urinary Tract                                                  | 37  | 0.201 | 0.057 | 0.707  | 0.012 |
|   | Skin or Cutaneous Sites                                        | 19  | 3.434 | 0.981 | 12.023 | 0.054 |
|   | Completion of the administration of antibiotics within 1 hour  | 173 | 1.625 | 0.314 | 8.406  | 0.562 |
|   | Completion of the administration of antibiotics within 3 hours | 205 | 0.249 | 0.040 | 1.552  | 0.136 |
|   | Respiratory support                                            |     |       |       |        |       |
|   | Mechanical ventilation                                         | 173 | 2.821 | 0.997 | 7.981  | 0.051 |
|   | High-flow nasal oxygen                                         | 38  | 0.201 | 0.042 | 0.963  | 0.045 |
|   | Additional ICU support                                         |     |       |       |        |       |
|   | Renal replacement therapy                                      | 101 | 3.429 | 1.538 | 7.645  | 0.003 |
|   | Red blood cell transfusion                                     | 93  | 0.618 | 0.271 | 1.409  | 0.252 |
|   | Platelet transfusion                                           | 50  | 1.384 | 0.549 | 3.492  | 0.491 |
|   | Fresh frozen plasma transfusion                                | 58  | 1.477 | .604  | 3.609  | 0.392 |
|   | Surgical source control                                        | 25  | 0.667 | 0.195 | 2.282  | 0.519 |
|   | Non-surgical source control                                    | 78  | 0.332 | 0.140 | 0.786  | 0.012 |
|   | Constant                                                       |     | 0.133 |       |        | 0.002 |
| 9 | University affiliation                                         |     |       |       |        |       |
|   | No                                                             | 153 | Ref.  |       |        | NA    |
|   | Yes                                                            | 99  | 2.518 | 1.049 | 6.042  | 0.039 |
|   | Intensivist to patient ratio                                   |     |       |       |        |       |
|   | 1 intensivist : 5 or fewer patients                            | 165 | Ref.  |       |        | 0.115 |
|   | 1 intensivist : 6 to 8 patients                                | 75  | 3.042 | 1.050 | 8.811  | 0.040 |

|    |                                                                |     |       |       |        |       |
|----|----------------------------------------------------------------|-----|-------|-------|--------|-------|
|    | 1 intensivist : 12 or more patients                            | 12  | 1.151 | 0.239 | 5.554  | 0.861 |
|    | Training program in ICU                                        |     |       |       |        |       |
|    | No                                                             | 50  | Ref.  |       |        | NA    |
|    | Yes                                                            | 202 | 0.282 | 0.101 | 0.788  | 0.016 |
|    | Cardiovascular disease                                         | 78  | 2.010 | 0.905 | 4.464  | 0.086 |
|    | Solid malignant tumors                                         | 12  | 5.854 | 1.368 | 25.056 | 0.017 |
|    | SOFA                                                           |     |       |       |        |       |
|    | < 10                                                           | 172 | Ref.  |       |        | NA    |
|    | ≥ 10                                                           | 78  | 2.858 | 1.287 | 6.346  | 0.010 |
|    | APACHE II                                                      |     |       |       |        |       |
|    | < 19                                                           | 129 | Ref.  |       |        | NA    |
|    | ≥ 19                                                           | 123 | 1.590 | 0.683 | 3.700  | 0.282 |
|    | Urinary Tract                                                  | 37  | 0.207 | 0.059 | 0.727  | 0.014 |
|    | Skin or Cutaneous Sites                                        | 19  | 3.541 | 1.009 | 12.428 | 0.048 |
|    | Completion of the administration of antibiotics within 3 hours | 205 | 0.381 | 0.126 | 1.158  | 0.089 |
|    | Respiratory support                                            |     |       |       |        |       |
|    | Mechanical ventilation                                         | 173 | 2.862 | 1.012 | 8.090  | 0.047 |
|    | High-flow nasal oxygen                                         | 38  | 0.200 | 0.042 | 0.954  | 0.043 |
|    | Additional ICU support                                         |     |       |       |        |       |
|    | Renal replacement therapy                                      | 101 | 3.380 | 1.515 | 7.538  | 0.003 |
|    | Red blood cell transfusion                                     | 93  | 0.612 | 0.268 | 1.397  | 0.244 |
|    | Platelet transfusion                                           | 50  | 1.390 | 0.553 | 3.492  | 0.484 |
|    | Fresh frozen plasma transfusion                                | 58  | 1.464 | 0.599 | 3.575  | 0.403 |
|    | Surgical source control                                        | 25  | 0.690 | 0.203 | 2.347  | 0.553 |
|    | Non-surgical source control                                    | 78  | 0.331 | 0.140 | .784   | 0.012 |
|    | Constant                                                       |     | 0.133 |       |        | 0.002 |
| 10 | University affiliation                                         |     |       |       |        |       |
|    | No                                                             | 153 | Ref.  |       |        | NA    |
|    | Yes                                                            | 99  | 2.422 | 1.020 | 5.752  | 0.045 |
|    | Intensivist to patient ratio                                   |     |       |       |        |       |
|    | 1 intensivist : 5 or fewer patients                            | 165 | Ref.  |       |        | 0.106 |
|    | 1 intensivist : 6 to 8 patients                                | 75  | 3.115 | 1.077 | 9.013  | 0.036 |

|    |                                                                |     |       |       |        |       |
|----|----------------------------------------------------------------|-----|-------|-------|--------|-------|
|    | 1 intensivist : 12 or more patients                            | 12  | 1.195 | 0.250 | 5.713  | 0.824 |
|    | Training program in ICU                                        |     |       |       |        |       |
|    | No                                                             | 50  | Ref.  |       |        | NA    |
|    | Yes                                                            | 202 | 0.279 | 0.100 | 0.778  | 0.015 |
|    | Cardiovascular disease                                         | 78  | 2.035 | 0.920 | 4.503  | 0.080 |
|    | Solid malignant tumors                                         | 12  | 5.880 | 1.367 | 25.293 | 0.017 |
|    | SOFA                                                           |     |       |       |        |       |
|    | < 10                                                           | 172 | Ref.  |       |        | NA    |
|    | ≥ 10                                                           | 78  | 2.853 | 1.287 | 6.324  | 0.010 |
|    | APACHE II                                                      |     |       |       |        |       |
|    | < 19                                                           | 129 | Ref.  |       |        | NA    |
|    | ≥ 19                                                           | 123 | 1.616 | 0.697 | 3.747  | 0.263 |
|    | Urinary Tract                                                  | 37  | 0.205 | 0.058 | .719   | 0.013 |
|    | Skin or Cutaneous Sites                                        | 19  | 3.452 | 1.002 | 11.897 | 0.050 |
|    | Completion of the administration of antibiotics within 3 hours | 205 | 0.378 | 0.125 | 1.143  | 0.085 |
|    | Respiratory support                                            |     |       |       |        |       |
|    | Mechanical ventilation                                         | 173 | 2.854 | 1.009 | 8.070  | 0.048 |
|    | High-flow nasal oxygen                                         | 38  | 0.205 | 0.043 | 0.977  | 0.047 |
|    | Additional ICU support                                         |     |       |       |        |       |
|    | Renal replacement therapy                                      | 101 | 3.464 | 1.561 | 7.691  | 0.002 |
|    | Red blood cell transfusion                                     | 93  | 0.599 | 0.264 | 1.358  | 0.220 |
|    | Platelet transfusion                                           | 50  | 1.394 | 0.556 | 3.494  | 0.479 |
|    | Fresh frozen plasma transfusion                                | 58  | 1.467 | 0.601 | 3.585  | 0.400 |
|    | Non-surgical source control                                    | 78  | 0.333 | 0.140 | 0.789  | 0.012 |
|    | Constant                                                       |     | 0.129 |       |        | 0.001 |
| 11 | University affiliation                                         |     |       |       |        |       |
|    | No                                                             | 153 | Ref.  |       |        | NA    |
|    | Yes                                                            | 99  | 2.581 | 1.108 | 6.011  | 0.028 |
|    | Intensivist to patient ratio                                   |     |       |       |        |       |
|    | 1 intensivist : 5 or fewer patients                            | 165 | Ref.  |       |        | 0.109 |
|    | 1 intensivist : 6 to 8 patients                                | 75  | 3.074 | 1.064 | 8.886  | 0.038 |
|    | 1 intensivist : 12 or                                          | 12  | 1.112 | 0.237 | 5.207  | 0.893 |



|    |                                                                |     |       |       |        |       |
|----|----------------------------------------------------------------|-----|-------|-------|--------|-------|
|    | more patients                                                  |     |       |       |        |       |
|    | Training program in ICU                                        |     |       |       |        |       |
|    | No                                                             | 50  | Ref.  |       |        | NA    |
|    | Yes                                                            | 202 | 0.269 | 0.097 | 0.747  | 0.012 |
|    | Cardiovascular disease                                         | 78  | 1.999 | 0.905 | 4.414  | 0.087 |
|    | Solid malignant tumors                                         | 12  | 5.912 | 1.384 | 25.250 | 0.016 |
|    | SOFA                                                           |     |       |       |        |       |
|    | < 10                                                           | 172 | Ref.  |       |        | NA    |
|    | ≥ 10                                                           | 78  | 2.913 | 1.318 | 6.435  | 0.008 |
|    | APACHE II                                                      |     |       |       |        |       |
|    | < 19                                                           | 129 | Ref.  |       |        | NA    |
|    | ≥ 19                                                           | 123 | 1.596 | 0.691 | 3.687  | 0.274 |
|    | Urinary Tract                                                  | 37  | 0.215 | 0.062 | 0.746  | 0.015 |
|    | Skin or Cutaneous Sites                                        | 19  | 3.527 | 1.029 | 12.091 | 0.045 |
|    | Completion of the administration of antibiotics within 3 hours | 205 | 0.369 | 0.122 | 1.111  | 0.076 |
|    | Respiratory support                                            |     |       |       |        |       |
|    | Mechanical ventilation                                         | 173 | 2.892 | 1.022 | 8.188  | 0.045 |
|    | High-flow nasal oxygen                                         | 38  | 0.203 | 0.043 | 0.963  | 0.045 |
|    | Additional ICU support                                         |     |       |       |        |       |
|    | Renal replacement therapy                                      | 101 | 3.524 | 1.591 | 7.808  | 0.002 |
|    | Platelet transfusion                                           | 50  | 0.646 | 0.294 | 1.419  | 0.277 |
|    | Fresh frozen plasma transfusion                                | 58  | 1.567 | 0.657 | 3.735  | 0.311 |
|    | Non-surgical source control                                    | 78  | 0.322 | 0.136 | 0.759  | 0.010 |
|    | Constant                                                       |     | 0.133 |       |        | 0.002 |
| 12 | University affiliation                                         |     |       |       |        |       |
|    | No                                                             | 153 | Ref.  |       |        | NA    |
|    | Yes                                                            | 99  | 2.431 | 1.058 | 5.588  | 0.036 |
|    | Intensivist to patient ratio                                   |     |       |       |        |       |
|    | 1 intensivist : 5 or fewer patients                            | 165 | Ref.  |       |        | 0.117 |
|    | 1 intensivist : 6 to 8 patients                                | 75  | 3.020 | 1.051 | 8.677  | 0.040 |
|    | 1 intensivist : 12 or more patients                            | 12  | 1.182 | 0.252 | 5.547  | 0.833 |
|    | Training program in ICU                                        |     |       |       |        |       |
|    | No                                                             | 50  | Ref.  |       |        | NA    |

|    |                                                                |     |       |       |        |       |
|----|----------------------------------------------------------------|-----|-------|-------|--------|-------|
|    | Yes                                                            | 202 | 0.298 | 0.111 | 0.803  | 0.017 |
|    | Cardiovascular disease                                         | 78  | 1.969 | 0.897 | 4.322  | 0.091 |
|    | Solid malignant tumors                                         | 12  | 5.678 | 1.355 | 23.795 | 0.018 |
|    | SOFA                                                           |     |       |       |        |       |
|    | < 10                                                           | 172 | Ref.  |       |        | NA    |
|    | ≥ 10                                                           | 78  | 3.035 | 1.378 | 6.684  | 0.006 |
|    | APACHE II                                                      |     |       |       |        |       |
|    | < 19                                                           | 129 | Ref.  |       |        | NA    |
|    | ≥ 19                                                           | 123 | 1.571 | 0.683 | 3.609  | 0.288 |
|    | Urinary Tract                                                  | 37  | 0.241 | 0.073 | 0.800  | 0.020 |
|    | Skin or Cutaneous Sites                                        | 19  | 3.518 | 1.019 | 12.146 | 0.047 |
|    | Completion of the administration of antibiotics within 3 hours | 205 | .354  | 0.118 | 1.060  | 0.064 |
|    | Respiratory support                                            |     |       |       |        |       |
|    | Mechanical ventilation                                         | 173 | 2.888 | 1.021 | 8.170  | 0.046 |
|    | High-flow nasal oxygen                                         | 38  | 0.194 | 0.041 | 0.912  | 0.038 |
|    | Additional ICU support                                         |     |       |       |        |       |
|    | Renal replacement therapy                                      | 101 | 3.725 | 1.694 | 8.192  | 0.001 |
|    | Platelet transfusion                                           | 50  | 0.715 | 0.334 | 1.531  | 0.388 |
|    | Non-surgical source control                                    | 78  | 0.333 | 0.142 | 0.781  | 0.011 |
|    | Constant                                                       |     | 0.132 |       |        | 0.001 |
| 13 | University affiliation                                         |     |       |       |        |       |
|    | No                                                             | 153 | Ref.  |       |        | NA    |
|    | Yes                                                            | 99  | 2.375 | 1.035 | 5.448  | 0.041 |
|    | Intensivist to patient ratio                                   |     |       |       |        |       |
|    | 1 intensivist : 5 or fewer patients                            | 165 | Ref.  |       |        | 0.123 |
|    | 1 intensivist : 6 to 8 patients                                | 75  | 2.983 | 1.037 | 8.576  | 0.043 |
|    | 1 intensivist : 12 or more patients                            | 12  | 1.189 | .252  | 5.610  | 0.827 |
|    | Training program in ICU                                        |     |       |       |        |       |
|    | No                                                             | 50  | Ref.  |       |        | NA    |
|    | Yes                                                            | 202 | 0.298 | 0.111 | 0.801  | 0.016 |
|    | Cardiovascular disease                                         | 78  | 1.987 | 0.907 | 4.352  | 0.086 |
|    | Solid malignant tumors                                         | 12  | 5.332 | 1.285 | 22.125 | 0.021 |
|    | SOFA                                                           |     |       |       |        |       |
|    | < 10                                                           | 172 | Ref.  |       |        | NA    |

|    |                                                                |     |       |       |        |       |
|----|----------------------------------------------------------------|-----|-------|-------|--------|-------|
|    | ≥ 10                                                           | 78  | 2.958 | 1.347 | 6.497  | 0.007 |
|    | APACHE II                                                      |     |       |       |        |       |
|    | < 19                                                           | 129 | Ref.  |       |        | NA    |
|    | ≥ 19                                                           | 123 | 1.601 | 0.697 | 3.680  | 0.268 |
|    | Urinary Tract                                                  | 37  | 0.244 | 0.075 | 0.798  | 0.020 |
|    | Skin or Cutaneous Sites                                        | 19  | 3.524 | 1.029 | 12.061 | 0.045 |
|    | Completion of the administration of antibiotics within 3 hours | 205 | 0.370 | 0.126 | 1.088  | 0.071 |
|    | Respiratory support                                            |     |       |       |        |       |
|    | Mechanical ventilation                                         | 173 | 2.736 | 0.976 | 7.669  | 0.056 |
|    | High-flow nasal oxygen                                         | 38  | 0.203 | 0.043 | 0.950  | 0.043 |
|    | Additional ICU support                                         |     |       |       |        |       |
|    | Renal replacement therapy                                      | 101 | 3.332 | 1.586 | 7.000  | 0.001 |
|    | Non-surgical source control                                    | 78  | 0.328 | 0.140 | 0.767  | 0.010 |
|    | Constant                                                       |     | 0.129 |       |        | 0.001 |
| 14 | University affiliation                                         |     |       |       |        |       |
|    | No                                                             | 153 | Ref.  |       |        | NA    |
|    | Yes                                                            | 99  | 2.474 | 1.085 | 5.643  | 0.031 |
|    | Intensivist to patient ratio                                   |     |       |       |        |       |
|    | 1 intensivist : 5 or fewer patients                            | 165 | Ref.  |       |        | 0.165 |
|    | 1 intensivist : 6 to 8 patients                                | 75  | 2.591 | 0.945 | 7.101  | 0.064 |
|    | 1 intensivist : 12 or more patients                            | 12  | 0.929 | 0.212 | 4.076  | 0.923 |
|    | Training program in ICU                                        |     |       |       |        |       |
|    | No                                                             | 50  | Ref.  |       |        | NA    |
|    | Yes                                                            | 202 | 0.287 | 0.107 | 0.769  | 0.013 |
|    | Cardiovascular disease                                         | 78  | 2.140 | .989  | 4.630  | 0.053 |
|    | Solid malignant tumors                                         | 12  | 4.904 | 1.197 | 20.082 | 0.027 |
|    | SOFA                                                           |     |       |       |        |       |
|    | < 10                                                           | 172 | Ref.  |       |        | NA    |
|    | ≥ 10                                                           | 78  | 3.194 | 1.473 | 6.925  | 0.003 |
|    | Urinary Tract                                                  | 37  | 0.259 | 0.080 | 0.838  | 0.024 |
|    | Skin or Cutaneous Sites                                        | 19  | 3.642 | 1.079 | 12.295 | 0.037 |
|    | Completion of the administration of antibiotics within 3 hours | 205 | 0.360 | 0.123 | 1.055  | 0.063 |

|    |                                                                |     |       |       |        |       |
|----|----------------------------------------------------------------|-----|-------|-------|--------|-------|
|    | Respiratory support                                            |     |       |       |        |       |
|    | Mechanical ventilation                                         | 173 | 3.156 | 1.159 | 8.593  | 0.025 |
|    | High-flow nasal oxygen                                         | 38  | 0.211 | 0.045 | 0.992  | 0.049 |
|    | Additional ICU support                                         |     |       |       |        |       |
|    | Renal replacement therapy                                      | 101 | 3.504 | 1.675 | 7.331  | 0.001 |
|    | Non-surgical source control                                    | 78  | 0.311 | 0.134 | 0.719  | 0.006 |
|    | Constant                                                       |     | 0.151 |       |        | 0.002 |
| 15 | University affiliation                                         |     |       |       |        |       |
|    | No                                                             | 153 | Ref.  |       |        | NA    |
|    | Yes                                                            | 99  | 2.580 | 1.167 | 5.703  | 0.019 |
|    | Training program in ICU                                        |     |       |       |        |       |
|    | No                                                             | 50  | Ref.  |       |        | NA    |
|    | Yes                                                            | 202 | 0.297 | 0.110 | 0.802  | 0.017 |
|    | Cardiovascular disease                                         | 78  | 2.088 | 0.973 | 4.478  | 0.059 |
|    | Solid malignant tumors                                         | 12  | 4.586 | 1.141 | 18.434 | 0.032 |
|    | SOFA                                                           |     |       |       |        |       |
|    | < 10                                                           | 172 | Ref.  |       |        | NA    |
|    | ≥ 10                                                           | 78  | 2.840 | 1.347 | 5.985  | 0.006 |
|    | Urinary Tract                                                  | 37  | 0.277 | 0.087 | 0.880  | 0.030 |
|    | Skin or Cutaneous Sites                                        | 19  | 2.937 | 0.928 | 9.289  | 0.067 |
|    | Completion of the administration of antibiotics within 3 hours | 205 | 0.326 | 0.115 | 0.923  | 0.035 |
|    | Respiratory support                                            |     |       |       |        |       |
|    | Mechanical ventilation                                         | 173 | 2.765 | 1.041 | 7.345  | 0.041 |
|    | High-flow nasal oxygen                                         | 38  | 0.432 | 0.116 | 1.618  | 0.213 |
|    | Additional ICU support                                         |     |       |       |        |       |
|    | Renal replacement therapy                                      | 101 | 3.302 | 1.604 | 6.799  | 0.001 |
|    | Non-surgical source control                                    | 78  | 0.382 | .174  | 0.840  | 0.017 |
|    | Constant                                                       |     | 0.200 |       |        | 0.006 |
| 16 | University affiliation                                         |     |       |       |        |       |
|    | No                                                             | 153 | Ref.  |       |        | NA    |
|    | Yes                                                            | 99  | 2.562 | 1.164 | 5.639  | 0.019 |
|    | Training program in ICU                                        |     |       |       |        |       |
|    | No                                                             | 50  | Ref.  |       |        | NA    |
|    | Yes                                                            | 202 | 0.267 | 0.100 | 0.713  | 0.008 |

|  |                                                                |     |       |       |        |       |
|--|----------------------------------------------------------------|-----|-------|-------|--------|-------|
|  | Cardiovascular disease                                         | 78  | 2.047 | 0.954 | 4.391  | 0.066 |
|  | Solid malignant tumors                                         | 12  | 4.630 | 1.130 | 18.970 | 0.033 |
|  | SOFA                                                           |     |       |       |        |       |
|  | < 10                                                           | 172 | Ref.  |       |        | NA    |
|  | ≥ 10                                                           | 78  | 2.801 | 1.332 | 5.891  | 0.007 |
|  | Urinary Tract                                                  | 37  | 0.276 | 0.087 | 0.878  | 0.029 |
|  | Skin or Cutaneous Sites                                        | 19  | 3.074 | 0.982 | 9.629  | 0.054 |
|  | Completion of the administration of antibiotics within 3 hours | 205 | 0.344 | 0.122 | 0.970  | 0.044 |
|  | Respiratory support                                            |     |       |       |        |       |
|  | Mechanical ventilation                                         | 173 | 3.086 | 1.180 | 8.072  | 0.022 |
|  | Additional ICU support                                         |     |       |       |        |       |
|  | Renal replacement therapy                                      | 101 | 3.433 | 1.669 | 7.058  | 0.001 |
|  | Non-surgical source control                                    | 78  | 0.385 | 0.175 | 0.842  | 0.017 |
|  | Constant                                                       |     | 0.182 |       |        | 0.004 |

Abbreviations: **AOR**: adjusted odds ratio; **APACHE II**, Acute Physiology and Chronic Health Examination II; **CI**: confidence interval; **ICU**, intensive care unit; **NA**: not available; **Ref.**, reference; **SOFA**, Sequential (Sepsis-Related) Organ Failure Assessment.

**Table S19. Breakdown of missing data**

| Variables                       | Number of patients with missing data |
|---------------------------------|--------------------------------------|
| <b>Hospital characteristics</b> |                                      |
| Type of hospital                | 0                                    |
| University affiliation          | 0                                    |
| <b>ICU characteristics</b>      |                                      |
| Nature of ICU                   | 0                                    |
| Type of ICU                     | 0                                    |
| Nurse to patient ratio          | 0                                    |
| Intensivist to patient ratio    | 0                                    |
| Training programme in ICU       | 0                                    |
| <b>Baseline characteristics</b> |                                      |
| Age (year)                      | 0                                    |
| Sex                             | 0                                    |
| Collection batch                | 0                                    |

|                                            |    |
|--------------------------------------------|----|
| Admission type                             | 0  |
| Admission source                           | 0  |
| Comorbidities                              | 0  |
| <b>Vital signs</b> (on admission into ICU) |    |
| GCS                                        | 1  |
| HR (beats per min)                         | 0  |
| Temperature (°C)                           | 0  |
| MBP (mmHg), mean(SD)                       | 0  |
| SBP (mmHg), mean (SD)                      | 0  |
| RR (breaths per min), median (IQR)         | 0  |
| <b>Blood investigations</b>                |    |
| Total WBC ( $\times 10^9/L$ )              | 0  |
| PLT ( $\times 10^9/L$ )                    | 0  |
| Hb (g/dL)                                  | 1  |
| Hct (%)                                    | 0  |
| K <sup>+</sup> (mmol/L)                    | 0  |
| Na <sup>+</sup> (mmol/L)                   | 0  |
| Creatinine ( $\mu\text{mol/L}$ )           | 0  |
| Bilirubin ( $\mu\text{mol/l}$ )            | 20 |
| pH, mean (SD)                              | 3  |
| PaO <sub>2</sub> (mmHg)                    | 8  |
| FiO <sub>2</sub> (mmHg)                    | 7  |
| PaO <sub>2</sub> /FiO <sub>2</sub> ratio   | 9  |
| <b>Severity of illness scores</b>          |    |
| qSOFA                                      | 0  |
| SIRS                                       | 0  |
| SOFA                                       | 2  |
| APACHE II                                  | 0  |
| <b>Site of Infection</b>                   |    |
| Respiratory                                | 0  |
| Urinary tract                              | 0  |
| Abdominal                                  | 0  |

|                                                        |   |
|--------------------------------------------------------|---|
| Neurological                                           | 0 |
| Bones or joints                                        | 0 |
| Skin or cutaneous sites                                | 0 |
| Intravascular catheter                                 | 0 |
| Infective endocarditis                                 | 0 |
| Primary bacteraemia                                    | 0 |
| Systemic                                               | 0 |
| <b>Measurements around time zero</b>                   |   |
| Blood culture                                          | 0 |
| Lactate measurement                                    | 0 |
| Antibiotic administration                              | 0 |
| Fluid bolus                                            | 2 |
| <b>Resources used in ICU</b> (anytime during ICU stay) |   |
| Vasopressors/Intropes                                  | 0 |
| Mechanical ventilation                                 | 1 |
| Noninvasive ventilation                                | 1 |
| High-flow nasal cannula                                | 1 |
| Renal replacement therapy                              | 1 |
| Red blood cell transfusion                             | 1 |
| Platelet transfusion                                   | 1 |
| Fresh frozen plasma transfusion                        | 1 |
| Surgical source control                                | 1 |
| Non-surgical source control                            | 1 |
| <b>In-hospital time course</b> (DD/MM/YY (HHMM))       |   |
| Admission date to the hospital                         | 0 |
| Admission date to the ICU                              | 0 |
| Time zero                                              | 0 |
| Time of blood culture                                  | 2 |
| Time of lactate measurement                            | 1 |
| Time of antibiotic administration                      | 2 |

|                                                                                       |   |
|---------------------------------------------------------------------------------------|---|
| Time of starting vasopressor                                                          | 3 |
| Time of first source control measure                                                  | 0 |
| Discharge date from current ICU stay or death date in your current ICU stay           | 1 |
| Discharge date from current hospital stay or death date in your current hospital stay | 1 |
